# Supplementary material for: Progress in health among regions of Ethiopia, 1990–2019: a subnational country analysis for the Global Burden of Disease Study 2019
Source: PubMed Central journal article supplement (PMC8987934; doi:10.1016/s0140-6736(21)02868-3), 2022-04-02
Supplement: mmc1.pdf [file mmc1.pdf]

# THE LANCET

## Supplementary appendix

This appendix formed part of the original submission and has been peer reviewed. We post it as supplied by the authors.

Supplement to: GBD 2019 Ethiopia Subnational-Level Disease Burden Initiative Collaborators. Progress in health among regions of Ethiopia, 1990–2019: a subnational country analysis for the Global Burden of Disease Study 2019. *Lancet* 2022; published online Mar, 13. [https://doi.org/10.1016/S0140-6736\(21\)02868-3](https://doi.org/10.1016/S0140-6736(21)02868-3).

## Supplementary appendix to “Progress in health among regions of Ethiopia, 1990–2019: a subnational country analysis for the Global Burden of Disease Study 2019”

This appendix provides supplemental figures and more detailed results for “Progress in health among regions of Ethiopia, 1990–2019: a subnational country analysis for the Global Burden of Disease Study 2019.”

### Table of Contents

|                                                                                                                                                                                              |    |
|----------------------------------------------------------------------------------------------------------------------------------------------------------------------------------------------|----|
| List of figures and tables .....                                                                                                                                                             | 3  |
| Figures.....                                                                                                                                                                                 | 3  |
| Tables .....                                                                                                                                                                                 | 3  |
| Section 1: Ethiopia subnational population and demography mapping over time, 1942-2019.....                                                                                                  | 5  |
| 1.1 Afar region .....                                                                                                                                                                        | 6  |
| 1.2 Amhara region.....                                                                                                                                                                       | 6  |
| 1.3 Oromia region .....                                                                                                                                                                      | 7  |
| 1.4 Southern Nations and Nationalities and People region .....                                                                                                                               | 8  |
| 1.5 Gambella region.....                                                                                                                                                                     | 8  |
| 1.6 Somali region .....                                                                                                                                                                      | 8  |
| 1.7 Benishangul-Gumuz region.....                                                                                                                                                            | 8  |
| 1.8 Harari region .....                                                                                                                                                                      | 9  |
| 1.9 Addis Ababa chartered city .....                                                                                                                                                         | 9  |
| 1.10 Dire Dawa chartered city.....                                                                                                                                                           | 9  |
| 1.11 Tigray region.....                                                                                                                                                                      | 9  |
| Section 2: Global Burden of Disease (GBD 2019) Method Summary .....                                                                                                                          | 11 |
| Section 3: Input Data Sources.....                                                                                                                                                           | 12 |
| Section 4: GBD Strengths and Limitations.....                                                                                                                                                | 12 |
| Section 5: Statement of GATHER Compliance.....                                                                                                                                               | 14 |
| Section 6: Author Contributions.....                                                                                                                                                         | 15 |
| Section 7: Figures and Tables.....                                                                                                                                                           | 16 |
| Figures.....                                                                                                                                                                                 | 16 |
| Figure S1. TFR for regions and chartered cities in Ethiopia, 2019.....                                                                                                                       | 16 |
| Figure S2. TFR percent change for regions and chartered cities in Ethiopia, 1990–2019.....                                                                                                   | 17 |
| Figure S3. Life expectancy between regions and cities, females and males in Ethiopia, in 2019 .....                                                                                          | 18 |
| Figure S4. Variation of life expectancy between regions and cities from 1980 to 2019 by sex, in Ethiopia.....                                                                                | 19 |
| Figure S5. LE percent change by regions and chartered cities in Ethiopia, 1990-2019.....                                                                                                     | 20 |
| Figure S6. Ranks of causes of death with age-standardised death rate per 100,000 for both sexes, in Ethiopia, 2019 .....                                                                     | 21 |
| Figure S7. Trends in YLL rates per 100 000 population for the seven causes with the highest national burden and LE improvement in Ethiopia and regions and chartered cities, 1990–2019 ..... | 22 |
| Tables .....                                                                                                                                                                                 | 26 |
| Table S1. SDI variance between 9 regions and 2 chartered cities in Ethiopia, 1990-2019.....                                                                                                  | 26 |

|                                                                                                                                                                                                                                 |    |
|---------------------------------------------------------------------------------------------------------------------------------------------------------------------------------------------------------------------------------|----|
| Table S2. LE for regions and chartered cities, both sexes, females and males in Ethiopia, 1990 to 2019.....                                                                                                                     | 27 |
| Table S3. LE and TFR variance and percent change between regions and chartered cities in Ethiopia, 1990-2019 .....                                                                                                              | 28 |
| Table S4. Female LE and TFR in regions and chartered cities in Ethiopia, 2019 .....                                                                                                                                             | 28 |
| Table S5. Age-standardised death, YLL, YLD and DALY rates per 100 000 populations for all causes combined and leading ten causes in Ethiopia’s regions and cities, both sexes, 2019 .....                                       | 29 |
| Table S6. Age-standardised death, YLL, YLD, and DALY rates for 100 000 population, both sexes for the leading 11 <sup>th</sup> -20 <sup>th</sup> causes in Ethiopia’s regions and chartered cities, 2019 .....                  | 34 |
| Table S7. SDI and LE for both sexes by age-standardised YLL rates for 5 leading causes in Ethiopia’s regions and chartered cities, both sexes, 2019.....                                                                        | 38 |
| Table S8. Age-standardised death rates per 100 000 population for all causes combined and leading 20 causes in Ethiopia’s regions and chartered cities, women and men, 2019 .....                                               | 39 |
| Table S9. Age-standardised YLL rates per 100 000 population for all causes combined and leading fifteen causes in Ethiopia’s regions and chartered cities, women and men, 2019.....                                             | 42 |
| Table S10. Age-standardised YLDs rates per 100 000 population for all causes combined and leading fifteen causes in Ethiopia’s regions and chartered cities, women, men, 2019.....                                              | 45 |
| Table S11. Age-standardised DALY rates per 100 000 populations for leading causes in Ethiopia’s 9 regions and 2 cities in 1990, 2019 and percentage changes for both sexes .....                                                | 48 |
| Table S12. Age-standardised DALY rates per 100 000 populations for all causes combined and leading fifteen causes in Ethiopia’s regions and chartered cities, women, men, 2019.....                                             | 49 |
| Table S13. Patterns of age-standardised leading causes of premature mortality in Ethiopia and regions and chartered cities, 2019 .....                                                                                          | 50 |
| Table S14. Burden of leading risk factors attributable to age-standardised YLL, YLD and DALYs rates in Ethiopia, both sexes, 2019 .....                                                                                         | 51 |
| Table S15. Risk factors attributable age-standardised DALY rates per 100 000 population for all risks combined and leading fifteen risk factors, in Ethiopia 9 regions and 2 cities, females, males, and both sexes, 2019 ..... | 52 |
| Table S16. Leading risk factors attribution to all-cause age-standardised YLLs rate per 100 000 populations for Ethiopia, 9 regions and 2 cities, both sexes, all age, in 2019 .....                                            | 55 |
| Table S17. Top 10 leading causes of national age-standardised death, YLL, YLD and DALY rates per 100,000 for both sexes in Ethiopia in 2019, and the percent change of variation from 1990.....                                 | 57 |
| Table S18. GATHER Checklist for “Progress in health among regions of Ethiopia, 1990-2019: a sub-national country analysis for the Global Burden of Disease Study 2019”.....                                                     | 59 |
| Section 8: References .....                                                                                                                                                                                                     | 61 |

## List of figures and tables

Figures and tables are available in Section 7.

### Figures

Figure S1. TFR for regions and chartered cities in Ethiopia, 2019

Figure S2. TFR percent change for regions and chartered cities in Ethiopia, 1990–2019

Figure S3. Life expectancy between regions and cities, females and males in Ethiopia, in 2019

Figure S4. Variation of life expectancy between regions and cities from 1980 to 2019 by sex, in Ethiopia

Figure S5. LE percent change by regions and chartered cities in Ethiopia, 1990-2019

Figure S6. Ranks of causes of death with age-standardised death rate per 100,000 for both sexes, in Ethiopia, 2019

Figure S7. Trends in YLL rates per 100 000 population for the seven causes with the highest national burden and LE improvement in Ethiopia and regions and chartered cities, 1990–2019

### Tables

Table S1. SDI variance between 9 regions and 2 chartered cities in Ethiopia, 1990-2019

Table S2. LE for regions and chartered cities, both sexes, females and males in Ethiopia, 1990 to 2019

Table S3. LE and TFR variance and percent change between regions and chartered cities in Ethiopia, 1990-2019

Table S4. Female LE and TFR in regions and chartered cities in Ethiopia, 2019

Table S5. Age-standardised death, YLL, YLD and DALY rates per 100 000 populations for all causes combined and leading ten causes in Ethiopia's regions and cities, both sexes, 2019

Table S6. Age-standardised death, YLL, YLD, and DALY rates for 100 000 population, both sexes for the leading 11<sup>th</sup>-20<sup>th</sup> causes in Ethiopia's regions and chartered cities, 2019

Table S7. SDI and LE for both sexes by age-standardised YLL rates for 5 leading causes in Ethiopia's regions and chartered cities, both sexes, 2019

Table S8. Age-standardised death rates per 100 000 population for all causes combined and leading 20 causes in Ethiopia's regions and chartered cities, women and men, 2019

Table S9. Age-standardised YLL rates per 100 000 population for all causes combined and leading fifteen causes in Ethiopia's regions and chartered cities, women and men, 2019

Table S10. Age-standardised YLDs rates per 100 000 population for all causes combined and leading fifteen causes in Ethiopia's regions and chartered cities, women, men, 2019

Table S11. Age-standardised DALY rates per 100 000 populations for leading causes in Ethiopia's 9 regions and 2 cities in 1990, 2019 and percentage changes for both sexes

Table S12. Age-standardised DALY rates per 100 000 populations for all causes combined and leading fifteen causes in Ethiopia's regions and chartered cities, women, men, 2019

Table S13. Patterns of age-standardised leading causes of premature mortality in Ethiopia and regions and chartered cities, 2019

Table S14. Burden of leading risk factors attributable to age-standardised YLL, YLD and DALYs rates in Ethiopia, both sexes, 2019

Table S15. Risk factors attributable age-standardised DALY rates per 100 000 populations for all risks combined and leading fifteen risk factors, in Ethiopia 9 regions and 2 cities, women, men, and both sexes, 2019

Table S16. Leading risk factors attribution to all-cause age-standardised YLLs rate per 100 000 populations for Ethiopia, 9 regions and 2 cities, both sexes, all age, in 2019

Table S17. Top 10 leading causes of national age-standardised death, YLL, YLD and DALY rates per 100,000 for both sexes in Ethiopia in 2019, and the percent change of variation from 1990

Table S18. GATHER Checklist for “Progress in health among regional states of Ethiopia, 1990-2019: a sub-national country analysis for the Global Burden of Disease Study 2019”

## Section 1: Ethiopia subnational population and demography mapping over time, 1942-2019

In 1942, Ethiopia was administratively divided into 12 subnational states and there were boundary changes following 1955, 1987 and 1995 constitutional changes.

**Table 1: Administrative boundary changes in Ethiopia following constitutional changes from 1942-1995**

| Build up time-1 | location Name | Build up time-2 | Location Name | Build up time-3 | Location Name | Build up time-4 | Location Name, 2019 |
|-----------------|---------------|-----------------|---------------|-----------------|---------------|-----------------|---------------------|
|                 | Ethiopia      |                 | Ethiopia      |                 | Ethiopia      |                 | Ethiopia            |
| 1942            | Arsi          | 1942            | Arsi          | 1942            | Arsi          | 1995            | Oromia              |
| 1942            | Gamo Gofa     | 1942            | Gamo Gofa     | 1987            | North Omo     | 1995            | SNNP                |
|                 |               |                 |               | 1987            | South Omo     | 1995            | SNNP                |
| 1942            | Gojam         | 1942            | Gojam         | 1987            | East Gojam    | 1995            | Amhara              |
|                 |               |                 |               | 1987            | West Gojam    | 1995            | Amhara              |
|                 |               |                 |               | 1987            | Metekel       | 1995            | B-Gumuz             |
| 1942            | Begemeder     | 1942            | Begemeder     | 1987            | North Gondar  | 1995            | Amhara              |
|                 |               |                 |               |                 |               | 1995            | Tigray              |
|                 |               |                 |               | 1987            | South Gondar  | 1995            | Amhara              |
| 1942            | Harerge       | 1960            | Bale          | 1987            | Bale          | 1995            | Oromia              |
|                 |               |                 | Harerge       | 1987            | Dire Dawa     | 1995            | Dire Dawa           |
|                 |               |                 |               |                 | Esat Harerge  | 1995            | Oromia              |
|                 |               |                 |               |                 | West Harerge  | 1995            | Harari              |
|                 |               |                 |               |                 | Ogaden (part) | 1995            | Oromia              |
| 1942            | Ilubabor      | 1942            | Ilubabor      | 1987            | Ilubabor      | 1995            | Somali              |
| 1942            | Kefa          | 1942            | Kefa          | 1987            | Gambella      | 1995            | Oromia              |
|                 |               |                 |               | 1942            | Kefa          | 1995            | Gambella            |
| 1942            | Shewa         | 1942            | Shewa         | 1987            | North Shewa   | 1995            | SNNP                |
|                 |               |                 |               | 1987            | South Shewa   | 1995            | Amhara              |
|                 |               |                 |               | 1987            | East Shewa    | 1995            | SNNP                |
|                 |               |                 |               | 1987            | West Shewa    | 1995            | Oromia              |
|                 |               | 1981            | Addis Ababa   | 1981            | Addis Ababa   | 1995            | Oromia              |
| 1942            | Sidamo        | 1942            | Sidamo        | 1987            | Sidamo        | 1995            | Addis Ababa         |
|                 |               |                 |               | 1987            | Borena        | 1995            | SNNP                |
| 1942            | Tigray        | 1942            | Tigray        | 1942            | Tigray        | 1995            | Oromia              |
| 1942            | Wellega       | 1942            | Wellega       | 1987            | Wellega       | 1995            | Tigray              |
|                 |               |                 |               | 1987            | Assosa        | 1995            | Benishangul-Gumuz   |
| 1942            | Wello         | 1942            | Wello         | 1987            | North Wello   | 1995            | Amhara              |
|                 |               |                 |               |                 |               |                 | Tigray              |
|                 |               |                 |               |                 |               |                 | Afar                |
|                 |               |                 |               | 1987            | South Wello   | 1995            | Amhara              |

In 1991, Ethiopia had 13 administrative subnational states. The current 9 Regions and 2 city councils of Ethiopia were established with the 1995 Ethiopia constitution. The boundaries of current regions differ from the former administrative regions. To map the population of regions for Ethiopia in the 2007, 1994, 1984 census (1–3); we used mainly district (called “woreda”) level mapping. The woreda structure was relatively stable over census years over government changes compared to other structures during the political changes between 1980 and 2017. The population is reasonably higher at woreda level. The three census rounds have produced a report at the woreda level. The current administrative system consists of the federal government, regions/chartered cities, zones, woredas (“districts”), and kebeles (lowest administrative units). The current government has also given more attention for districts for the decentralized health care system, including woreda based planning, to have decision-making occur near to the community and for resource allocation. Woreda level population mapping is also helpful to investigate the possibility of providing woreda level subnational estimates for Ethiopia in the future. Generally, mapping the

1994 and 2007 population has been easy since the location of data sources did not have geographic boundary changes for subnational states.

**Table 2: Administrative subnational regional states, provinces, districts in 1985**

| Administrative Regions | Awrajas (Province) | Districts |
|------------------------|--------------------|-----------|
| 1. Arsi                | 3                  | 22        |
| 2. Bale                | 5                  | 25        |
| 3. Gamo Gofa           | 4                  | 22        |
| 4. Gojam               | 7                  | 35        |
| 5. Gondar              | 7                  | 29        |
| 6. Harerge             | 15                 | 66        |
| 7. Ilubabor            | 5                  | 34        |
| 8. Kefa                | 6                  | 38        |
| 9. Shewa               | 11                 | 93        |
| 10. Sidamo             | 6                  | 34        |
| 11. Tigray             | 8                  | 55        |
| 12. Wellega            | 9                  | 49        |
| 13. Wello              | 12                 | 37        |
| Total                  | 98                 | 539       |

Source: Ministry of interior 1977 E.C (1985)

Reference: National Atlas of Ethiopia (CSA Library)

### 1.1 Afar region

Afar region did not exist in the 1984 census. Districts from the then Wello and Hararge regions jointly form the current Afar region. The districts' included were; DUBTI woreda (Wello), ELIDAR woreda (Wello), AWSSA woreda (Wello), AFAMBO woreda (Wello), MILE woreda (Wello), ARTUMA woreda (Wello), MISRAK AWASH woreda (Hararge), GEWANE woreda (Hararge). The population for these districts have been subtracted from the current Amhara and Oromia regions of their 1984 population as the then Wello Region has been included in Amhara and Hararge region included in Oromia. The 2007 and 1994 population by age and sex is available on the report for Afar region.

### 1.2 Amhara region

Amhara region was formed combining the former Gondar, Gojjam, Shewa and Wello regions. Some districts from Gondar moved to the current Tigray regional state, some districts from Gojjam moved to the current Benishangul-Gumuz region, some from the former Shewa moved to the current Oromia and SNNP region and from Wello moved to the current Tigray and Afar regions. The 2007 and 1994 population by age and sex is available on the report for Amhara region.

We used the following formula to estimate total population of the current Amhara region for the 1984 Amhara region:

$$\text{Amhara Region}_{\text{agesex } 1984} = (\text{Gondar}_{\text{agesex } 1984} - \text{Woredas to Tigray}_{\text{agesex } 1984}) + (\text{Gojjam}_{\text{agesex } 1984} - \text{Woredas to BG}_{\text{agesex } 1984}) + (\text{Shewa}_{\text{agesex } 1984} - \text{Woredas to SNNP}_{\text{agesex } 1984} - \text{Woreda to Oromia}_{\text{agesex } 1984}) + (\text{Wello}_{\text{agesex } 1984} - \text{Woreda to Tigray}_{\text{agesex } 1984} - \text{Woreda to Afar}_{\text{agesex } 1984})$$

where,  $\text{Amhara Region}_{\text{agesex } 1984}$  is the current Amhara region population for both sexes in 1984,  $\text{Gondar}_{\text{agesex } 1984}$  is the then Gondar's region population for both sexes in 1984,  $\text{Woredas to Tigray}_{\text{agesex } 1984}$  is woreda population for both sex classified to Tigray region of the 1984,  $\text{Gojjam}_{\text{agesex } 1984}$  is the then Gojjam's region population for both sexes in 1984,  $\text{Woredas to BG}_{\text{agesex } 1984}$  is woreda population for both sex in 1984 classified to the current Benishangul Gumuz,  $\text{Shewa}_{\text{agesex } 1984}$  is the then Shewa region population for both sexes in 1984,  $\text{Woredas to SNNP}_{\text{agesex } 1984}$  is woreda population for both sexes in 1984 classified to the current SNNP region,  $\text{Woreda to Oromia}_{\text{agesex } 1984}$  is woreda population for both sexes in 1984 classified to the current Oromia region,  $\text{Woreda to Somali}_{\text{agesex } 1984}$  is woreda population for both sexes in 1984 classified to the current Somali region,  $\text{Wello}_{\text{agesex } 1984}$  is the then Wello region population for both sexes in 1984,  $\text{Woreda to Tigray}_{\text{agesex } 1984}$  woreda population for both sex in 1984 classified to the current Tigray,  $\text{Woreda to Afar}_{\text{agesex } 1984}$  is woreda population for both sex in 1984 classified to the current Afar.

### 1.3 Oromia region

Many districts were further divided between 1994 (185 woreda) and 2007 census (280 woreda) and one woreda was included from the Somali region (CHINAKSAN district). The 2007 and 1994 population by age and sex is available on the report for Oromia region.

$$\text{Oromia Region}_{\text{agesex } 1984} \text{ Population} = (\text{Wellega}_{\text{agesex } 1984} - \text{Woredas to BENISHANGUL-GUMUZ}_{\text{agesex } 1984}) + (\text{Shewa}_{\text{agesex } 1984} - \text{Woreda to SNNP}_{\text{agesex } 1984}) - (\text{Woreda to Amhara}_{\text{agesex } 1984}) + ((\text{Hararge}_{\text{agesex } 1984} - \text{Woreda to Afar}_{\text{agesex } 1984} - \text{Woreda to Harari}_{\text{agesex } 1984} - \text{Woreda to Somali}_{\text{agesex } 1984} - \text{Woreda to Dire Dawa}_{\text{agesex } 1984})) + (\text{ILLUBABOUR}_{\text{agesex } 1984} - \text{Woredas to Gambella}_{\text{agesex } 1984} - \text{woredas to SNNP}_{\text{agesex } 1984}) + (\text{Bale}_{\text{agesex } 1984} - \text{Woredas to Somalia}_{\text{agesex } 1984}) + (\text{Keffa}_{\text{agesex } 1984} - \text{woredas to SNNP}_{\text{agesex } 1984}) + (\text{Arssi}_{\text{agesex } 1984}) + (\text{Sidamo}_{\text{agesex } 1984} - \text{Woredas to SNNP}_{\text{agesex } 1984})$$

where,  $\text{Oromia Region}_{\text{agesex } 1984}$  is Oromia region population for both sexes in 1984,  $\text{Wellega}_{\text{agesex } 1984}$  is the then Wellega's region population for both sexes in 1984,  $\text{Woredas to BENISHANGUL-GUMUZ}_{\text{agesex } 1984}$  is woreda population for both sex classified to Benishangul-Gumuz region of the 1984,  $\text{Shewa}_{\text{agesex } 1984}$  is the then Shewa's region population for both sexes in 1984,  $\text{Woreda to SNNP}_{\text{agesex } 1984}$  is woreda population for both sex in 1984 classified to the current SNNP region,  $\text{Woreda to Amhara}_{\text{agesex } 1984}$  is woreda population for both sexes in 1984 classified to the current Amhara region,  $\text{Hararge}_{\text{agesex } 1984}$  is the then Hararge region population for both sexes in 1984,  $\text{Woreda to Afar}_{\text{agesex } 1984}$  is woreda population for both sexes in 1984 classified to the current Afar region,  $\text{Woreda to Harari}_{\text{agesex } 1984}$  is woreda population for both sexes in 1984 classified to the current Harari region,  $\text{Woreda to Somali}_{\text{agesex } 1984}$  is woreda population for both sexes in 1984 classified to the current Somali region,  $\text{Woreda to Dire Dawa}_{\text{agesex } 1984}$  is woreda population for both sexes in 1984 classified to the current Dire Dawa city,  $\text{ILLUBABOUR}_{\text{agesex } 1984}$  is the then Illubabour's region population for both sexes in 1984,  $\text{Woredas to Gambella}_{\text{agesex } 1984}$  is woreda population for both sexes in 1984 classified to the current Gambella region,  $\text{woredas to SNNP}_{\text{agesex } 1984}$  is woreda population for both sexes in 1984 classified to the current SNNP region,  $\text{Bale}_{\text{agesex } 1984}$  is the then Bale's region population for both sexes in 1984,  $\text{Woredas to Somalia}_{\text{agesex } 1984}$  is woreda population for both sex in 1984 classified to the current Somali region,  $\text{Keffa}_{\text{agesex } 1984}$  is the then Keffa's region population for both sexes in 1984,  $\text{woredas to SNNP}_{\text{agesex } 1984}$  is woreda population for both sexes in 1984 classified to the current SNNP region,  $\text{Arssi}_{\text{agesex } 1984}$  is the then Arssi's region population for both sexes in 1984,  $\text{Sidamo}_{\text{agesex } 1984}$  is the then Sidamo's region population for both sexes in 1984 and  $\text{Woredas to SNNP}_{\text{agesex } 1984}$  is woreda population for both sexes in 1984 classified to the current SNNP region



#### 1.4 Southern Nations and Nationalities and People region

Southern Nations and Nationalities and People (SNNP) did not exist in the 1984 census. It was formed joining woredas from the former Shewa, Illubabour, Keffa, Gamo Gofa and Sidamo regions. The 2007 and 1994 population by age and sex is available on the report for SNNP region.

We used the following formula to conceptualize and estimate the 1984 population for the current SNNP Region.

$$\text{SNNP}_{\text{agesex1984}} = ((\text{Shewa}_{\text{agesex1984}} - \text{Woreda to Oromia}_{\text{agesex1984}}) - (\text{Woreda to Amhara}_{\text{agesex1984}})) + ((\text{ILLUBABOUR}_{\text{agesex1984}} - \text{Woredas to Gambella}_{\text{agesex1984}} - (\text{Woredas to Oromia}_{\text{agesex1984}})) + (\text{Keffa}_{\text{agesex1984}} - \text{Woredas to Oromia}_{\text{agesex1984}})) + (\text{Gamo Gofa}_{\text{agesex1984}}) + (\text{Sidamo}_{\text{agesex1984}} - \text{Woredas to Oromia}_{\text{agesex1984}})$$

where,  $\text{SNNP}_{\text{agesex1984}}$  is SNNP region population for both sexes in 1984,  $\text{Shewa}_{\text{agesex1984}}$  is Shewa region population for both sexes in 1984,  $\text{Woreda to Oromia}_{\text{agesex1984}}$  is woreda population for both sex classified to Oromia region of the 1984,  $\text{Woreda to Amhara}_{\text{agesex1984}}$  is woreda population for both sex classified to Amhara region,  $\text{ILLUBABOUR}_{\text{agesex1984}}$  is Illubabour region population for both sexes in 1984,  $\text{Woredas to Gambella}_{\text{agesex1984}}$  woreda population for both sex classified to Gambella region of the 1984,  $\text{Keffa}_{\text{agesex1984}}$  is Keffa region population for both sexes in 1984,  $\text{Gamo Gofa}_{\text{agesex1984}}$  is Gamo Gofa region population for both sexes in 1984,  $\text{Sidamo}_{\text{agesex1984}}$  Sidamo region population for both sexes in 1984.

#### 1.5 Gambella region

Gambella region did not exist in 1984 census. Woredas from the then ILLUBABOUR were separated to form the current Gambella. The woredas' included were; GAMBELLA woreda, ABOBO woreda, GOG JOR woreda, JIKAWO woreda, AKOBO woreda, GODARE woreda, ITANG woreda. These woredas were subtracted from the current Oromia region with their respective 1984 population. The 2007 and 1994 population by age and sex is available on the report for Gambella region.

#### 1.6 Somali region

Somali region did not exist in 1984 census. Woredas from the then HARARGE region and BALE region were considered to form the current Somali region. The woredas' included from the former HARARGE region were; AYISHA woreda, DENBEL woreda, SHINILE woreda, ERER woreda, DEGAHABUR AWRAJA, GODIE AWRAJA, KEBRI DEHAR AWRAJA, KELAFO AWRAJA, WELWEL AND WARDER AWRAJA, AFDEM woreda, BABILE woreda, GURSUM woreda, JIJIGA woreda, AWUBERE woreda, KEBRI BEYAH woreda, HARSHIN-woreda, FIK woreda, HAMERO woreda, MEYU MULUKE woreda; from BALE region were; LEGEHIDA woreda and GURADAMOLE woreda. Some of the locations included were Awaja (province, the structure which had many woredas under it) from the former HARARGE region as there were no woreda level reports. These woreda populations were subtracted from the current Oromia and Amhara region with their respective 1984 population. The 2007 and 1994 population by age and sex is available on the report for Somali region.

#### 1.7 Benishangul-Gumuz region

This region did not exist in the 1984 census. It was formed joining some woreda from the former Gojjam Region (DANGUR woreda, GUBA woreda, WENBERA woreda, MANDURA woreda, DIBATE woreda, GUANGUA woreda) and Wellega region (KURMUK woreda, ASOSA woreda, GIZEN woreda and BIEGI woreda). Population estimation to Benishangul Gumuz region to 1984 was relatively easy. The 2007 and 1994 population by age and sex is available on the report for Benishangul-Gumuz region.

Total population of the current Benishangul-Gumuz in 1984 was

$$\text{Total Population} = \text{DANGUR}_{\text{agesex1984}} + \text{GUBA}_{\text{agesex1984}} + \text{WENBERA}_{\text{agesex1984}} + \text{MANDURA}_{\text{agesex1984}} + \text{DIBATE}_{\text{agesex1984}} + \text{GUANGUA}_{\text{agesex1984}} + \text{KURMUK}_{\text{agesex1984}} + \text{ASOSA}_{\text{agesex1984}} + \text{GIZEN}_{\text{agesex1984}} + \text{BIEGI}_{\text{agesex1984}}$$

where, *DANGUR*<sub>agesex1984</sub> is Dangbur woreda population for both sexes in 1984, *GUBA*<sub>agesex1984</sub> is Guba woreda population for both sexes in 1984, *WENBERA*<sub>agesex1984</sub> is Wenbera woreda population for both sexes in 1984, *MANDURA*<sub>agesex1984</sub> is Mandura woreda population for both sexes in 1984, *DIBATE*<sub>agesex1984</sub> is Dibate woreda population for both sexes in 1984, *GUANGUA*<sub>agesex1984</sub> is Guangua woreda population for both sexes in 1984, *KURMUK*<sub>agesex1984</sub> is Kurmuk woreda population for both sexes in 1984, *ASOSA*<sub>agesex1984</sub> is Asosa woreda population for both sexes in 1984, *GIZEN*<sub>agesex1984</sub> is Gizen woreda population for both sexes in 1984, *BIEGI*<sub>agesex1984</sub> is Biegi woreda population for both sexes in 1984.

These woreda populations were subtracted from the current Amhara and Oromia regions with their 1984 population

## 1.8 Harari region

Harari region did not exist in 1984 census. Harar town and Harar rural kebeles separated from Hararge region to form the current Harari region. Relatively it has been easy to estimate the 1984 population. The 2007 and 1994 population by age and sex is available on the report for Harari subnational regional state. These woreda populations were subtracted from the current Oromia region of its 1984 population

## 1.9 Addis Ababa chartered city

Addis Ababa was city administration in the 2007, 1994 and 1984 census rounds and we considered reported population.

## 1.10 Dire Dawa chartered city

Dire Dawa chartered city did not exist in 1984 census. Woredas from the then HARARGE region, were considered to form the current Dire Dawa. The Woredas' included from the former HARARGE region were; Dire Dawa town and Gorgora woreda. The 2007 and 1994 population by age and sex is available on the report for Dire Dawa region. These woreda population were subtracted from the current Oromia region of its respective 1984 population

In terms of data sources, GBD 2019 has used 1057 distinct data sources by location for Ethiopia, regions and chartered cities.

## 1.11 Tigray region

According to census 1984 report of CSA (hard copies at CSA libraries which need to be digitalize); Tigray region was administratively divided into 8 Awrajas (provinces), 56 districts and 58 urban centers. However due to security and other reasons the census covered only 18 urban centers. The 1984 census has not covered the entire rural population of the region which is estimated to be 2,174,894 in 1984. In this case, we have not used woreda approach to map the population. Population data was not presented by sex and age for provinces. We used a different approach for Tigray

subnational state to take the whole population of the then Tigray Region for 1984 and add population of woreda or districts which were added in the 1994 census round. These were woreda which were under the then Gondar Region; TELEMET woreda (Population=60668), WELKAYIT woreda (Population=66415), TSEGEDE woreda (Population=69000), SETIT woreda (Population=36083); woreda which were under the then Wollo Region; ALAMATA woreda (Population=50731), OFLA woreda (Population=110994). These woreda were included to Tigray region in the 1994 and 2007 census. To map the population, we map the population of woreda using the former Gondar and Wollo region population age and sex structure (See the steps below). Then the population of these districts subtracted from the current Amhara region (currently involving the then Gondar and Wollo Regions). The 2007 and 1994 population by age and sex is available on the report for Tigray region.

**Table 3: Number of data sources by location in Ethiopia, GBD 2019**

| Location          | Numbers of distinct data sources by location |
|-------------------|----------------------------------------------|
| Ethiopia          | 313                                          |
| Addis Ababa       | 107                                          |
| Afar              | 57                                           |
| Amhara            | 75                                           |
| Benishangul-Gumuz | 54                                           |
| Dire Dawa         | 51                                           |
| Gambella          | 72                                           |
| Harari            | 52                                           |
| Oromia            | 80                                           |
| Somali            | 57                                           |
| SNNP              | 79                                           |
| Tigray            | 60                                           |
| <i>Total</i>      | <i>1057</i>                                  |

## Section 2: Global Burden of Disease (GBD 2019) Method Summary

The details of GBD demography methodology is published elsewhere (4), but in brief GBD estimates fertility, mortality and population using diversity of data sources. Spatiotemporal Gaussian process regression (ST-GPR) was used to generate age-specific fertility rates for 5-year age groups between ages 15 and 49 years, to synthesise data sources after correction for known biases. Adult mortality was measured as the probability of death between ages 15 and 60 years. HIV-free life tables were then estimated using estimates of under-5 and adult mortality rates using a relational model life table system created for GBD. Independent estimates of HIV-specific mortality generated by an epidemiological analysis of HIV prevalence surveys and antenatal clinic sero-surveillance and other sources were incorporated into the estimates in countries with large epidemics. Annual and single-year age estimates of net migration and population for each country and territory were generated using a Bayesian hierarchical cohort component model that analysed estimated age-specific fertility and mortality rates. GBD 2019 estimated each epidemiological quantity of interest for 23 age groups, males, females and both sexes combined for 204 countries and territories from 1990 to 2019 (5). All metrics were estimated separately for Ethiopia's 9 regions and 2 chartered cities, and are presented with their 95% uncertainty intervals (UIs). All estimates produced for GBD report 95% uncertainty intervals (UIs) that account for sampling and non-sampling error associated with data and various assumptions of the modelling process and are derived from the 2.5th and 97.5th percentiles of 1000 draws (6). The GBD disease and injury analytical framework generated estimates for every year from 1990 to 2019. GBD diseases and injuries were organised into a levelled cause hierarchy from the three broadest causes of death and disability at Level 1 to the most specific causes at Level 4. Within the three Level 1 causes (communicable, maternal, neonatal, and nutritional diseases; non-communicable diseases; and injuries), there were 174 Level 3 causes (7).

We estimated all-cause mortality rates for each age-sex-location-year using multistage models of adult and under-5 mortalities and the GBD model life table system (8). Cause-specific mortality rates were computed using the GBD cause-of-death database and, in most cases, the cause of death ensemble model (CODEm) as previously described (9). We estimated years of life lost (YLLs) for each cause by location, age, sex, and year by multiplying each cause specific death by the normative standard life expectancy and each age (10). The YLLs are years lost due to premature mortality and calculated by subtracting the age at death from the longest possible life expectancy for a person at that age. We estimated YLDs by multiplying the prevalence of each cause and its consequences by its disability weight, developed using population-based surveys, and corrected for comorbidity. Years lived with disability is measured by taking the prevalence of the condition multiplied by the disability weight for that condition (7). Disability weights are measured on a scale from 0 to 1, where 0 equals a state of full health and 1 equals death. Disability weights for the 440 health states (including combined health states) have been used to estimate YLDs for the GBD 2019 study and available online here: <http://ghdx.healthdata.org/record/ihme-data/gbd-2019-disability-weights>.

To estimate YLDs, a Bayesian meta-regression tool, DisMod-MR 2.1 published elsewhere in details (5), was used to evaluate all available data whilst ensuring consistency between incidence, prevalence, remission, and cause of death rates for each condition. The calculations for life expectancy at birth (LE) and maximum life expectancy at each age have been previously reported (8). Healthy life expectancy (HALE) summarizes overall population health accounting for length of life and level of health loss by age using YLD estimates and the GBD life tables, as previously described (4). Disability-adjusted life-years (DALYs), a combined measure of health lost to fatal and non-fatal causes, are calculated as the sum of YLLs and YLDs for each age-sex-location-year. One DALY equals one lost year of healthy life. We created maps of Ethiopia for the changes in all-cause, age-standardized YLLs and YLDs over time using Ethiopia census boundary data and geographic information software (11,12). GBD 2019 estimated Socio-demographic Index (SDI), it is a composite indicator of development status strongly correlated with health outcomes. It is the geometric mean of 0 to 1 indices of total fertility rate under the age of 25, mean education for those ages 15 and older, and lag distributed income (LDI) per capita. As a composite, a location with an SDI of 0 would have a theoretical minimum level of development relevant to health, while a location with an SDI of 1 would have a theoretical maximum level (8).

In the risk factor estimation, relative risk of mortality and morbidity, exposure to each risk factor, and ultimately attributable deaths or DALYs were estimated for each risk-outcome pair. The GBD 2019 estimation of attributable burden followed the general framework established for comparative risk assessment (CRA). GBD estimated the attributable burden for each risk by multiplying the YLLs and YLDs for each outcome of interest by the population attributable fraction (PAF) for the risk–outcome pair. The PAF represents the proportion of DALYs that would have been avoided in a given year if the exposure to a risk factor in the past had been at the theoretical minimum risk exposure level (13). The GBD risk factors were organised into a levelled hierarchy: Level 1 risk factors are behavioural; environmental and occupational; and metabolic; Level 2 risk factors include 20 clusters of risks; Level 3 includes 52 clusters of risks; and Level 4 includes 69 specific risk factors (14).

### **Section 3: Input Data Sources**

The EPHI, in collaboration with IHME, gathered 1057 distinct data sources by location for Ethiopia and all regions and cities that included census, demographic surveillance, household surveys, disease registry, health service utilisation, disease notification, and other data for this analysis (appendix section 1). A comprehensive description of data input sources (for each causes of death, covariates, fertility, mortality, non-fetal health outcomes, population and risk factors) and data quality of sources (data collection methods, completeness by age/sex and year, sample size and representativeness, and standard errors for the potential biases) and modelling for GBD 2019 has been reported here: <http://ghdx.healthdata.org/gbd-2019/data-input-sources>.

### **Section 4: GBD Strengths and Limitations**

The relevant limitations for burden of disease estimation in Ethiopia focus on data source availability and accessibility. When data were not available for a particular location, GBD modelled estimates use data from other locations and predictive covariates (5). Causes of death data sources used in GBD 2019 were mainly from verbal autopsy and sibling history, whose limitations have been discussed elsewhere (5,9). When new data or changes in modelling lead to

changes in estimates of disease burden, a strength of the GBD approach is that all previous estimates are recalculated with the newest model (4). Regardless of such rigorous and standardised methodology in GBD, the data incorporated into GBD 2019 were very scarce for Ethiopia and its regions and cities. The collaboration between EPHI and IHME helped to mitigate these limitations. The initiative has helped EPHI to transform the way health data is processed and used for health decisions at different levels. EPHI has built local data analytic capacity and platforms (<https://vizhub.ephi.gov.et>) and created an in-country data repository system to archive, access, and share data (<https://rtds.ephi.gov.et/public/>). A technical team from EPHI and IHME mapped and did inventory on priority data sources for different diseases and conditions, and accessed priority data types. The analysis has considered political, government and administrative changes over the years to map available data and populations. EPHI and IHME have organized one-week subnational review workshop and reviewed GBD 2019 subnational preliminary results with local researchers and collaborator experts in Ethiopia. Finally, a technical team from IHME and EPHI has reviewed final subnational results and agreed on the findings.

In GBD 2019, because of institutional collaboration, we used verbal autopsy data from seven Health and Demographic Surveillance Systems which represent Amhara, Oromia, SNNP, and Tigray regions. The data has been relatively comprehensive by age, sex, cause of death and location compared to scientific literatures. This resulted in including some data sources in the detail GBD causes. Because of the lack of completeness, misclassification of causes of death, unknown causes of death of these sources, there were wider uncertainties, as indicated with the 95% UI for age-standardised rates and therefore some of the variation could be due to different data sources rather than true underlying variation which largely affect policy debates, prioritization of causes, and health decisions.

The team overcame challenges of GBD regional level analysis to generate reliable estimates through institutional collaboration involving more than 700 GBD collaborator experts from Ethiopia. The estimates benefited from rounds of technical reviews and subnational review workshop having multidisciplinary researchers from EPHI, Ministry of Health, Central Statistical Agency, local universities, research institutes and non-governmental organizations in Ethiopia. The collaboration has helped to strengthen local data system in the National Data Management Center (NDMC) for health at EPHI. To improve estimates further, the collaboration has created sustainable system through building local burden of disease, evidence to policy translation and data repository and governance units at NDMC.

## **Section 5: Statement of GATHER Compliance**

This study complies with the Guidelines for Accurate and Transparent Health Estimates Reporting (GATHER) recommendations (5). GATHER defines best practices for documenting studies that synthesize evidence from multiple sources to quantitatively describe past and current population health and its determinants. These practices include documenting and sharing data inputs, analyses and methods, and results. Documenting the input data on which estimates are based, and the methods by which estimates are derived, is essential for the accurate interpretation and use of results. GBD 2019 analyses were completed with Python version 3.6.2, Stata version 13, and R version 3.5.0. Statistical code used for GBD estimation is publicly available online: <http://ghdx.healthdata.org/gbd2019/code>. See table S18 for the GATHER checklist.

The GATHER recommendations can be found at the GATHER website under [GATHER Statement](#).

## **Section 6: Author Contributions**

This section will be completed following re-submission of the manuscript.



## Section 7: Figures and Tables

### Figures

Figure S1. TFR for regions and chartered cities in Ethiopia, 2019

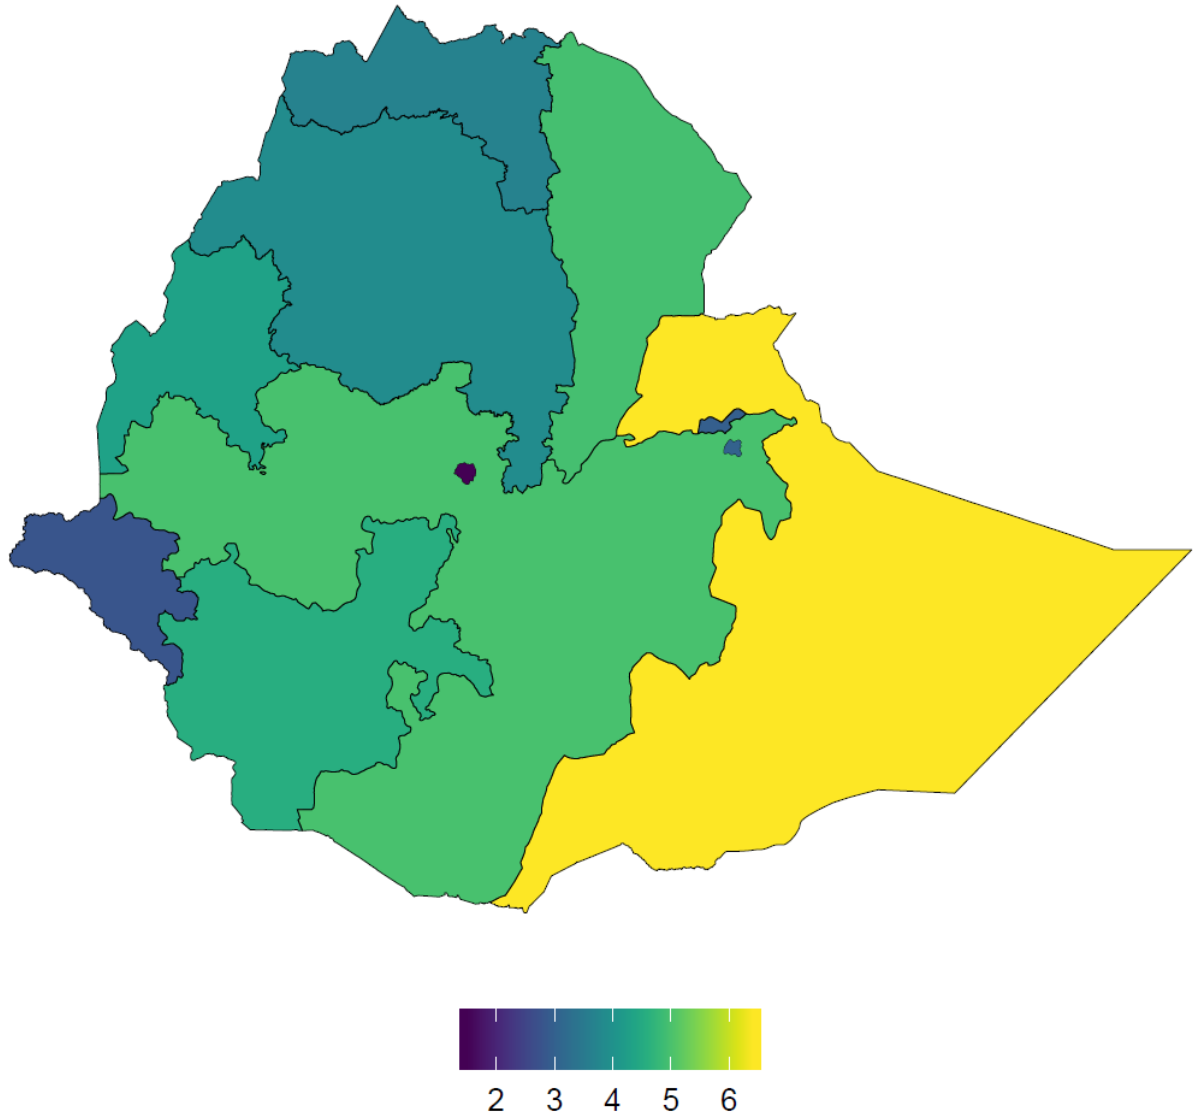

Figure S2. TFR percent change for regions and chartered cities in Ethiopia, 1990–2019

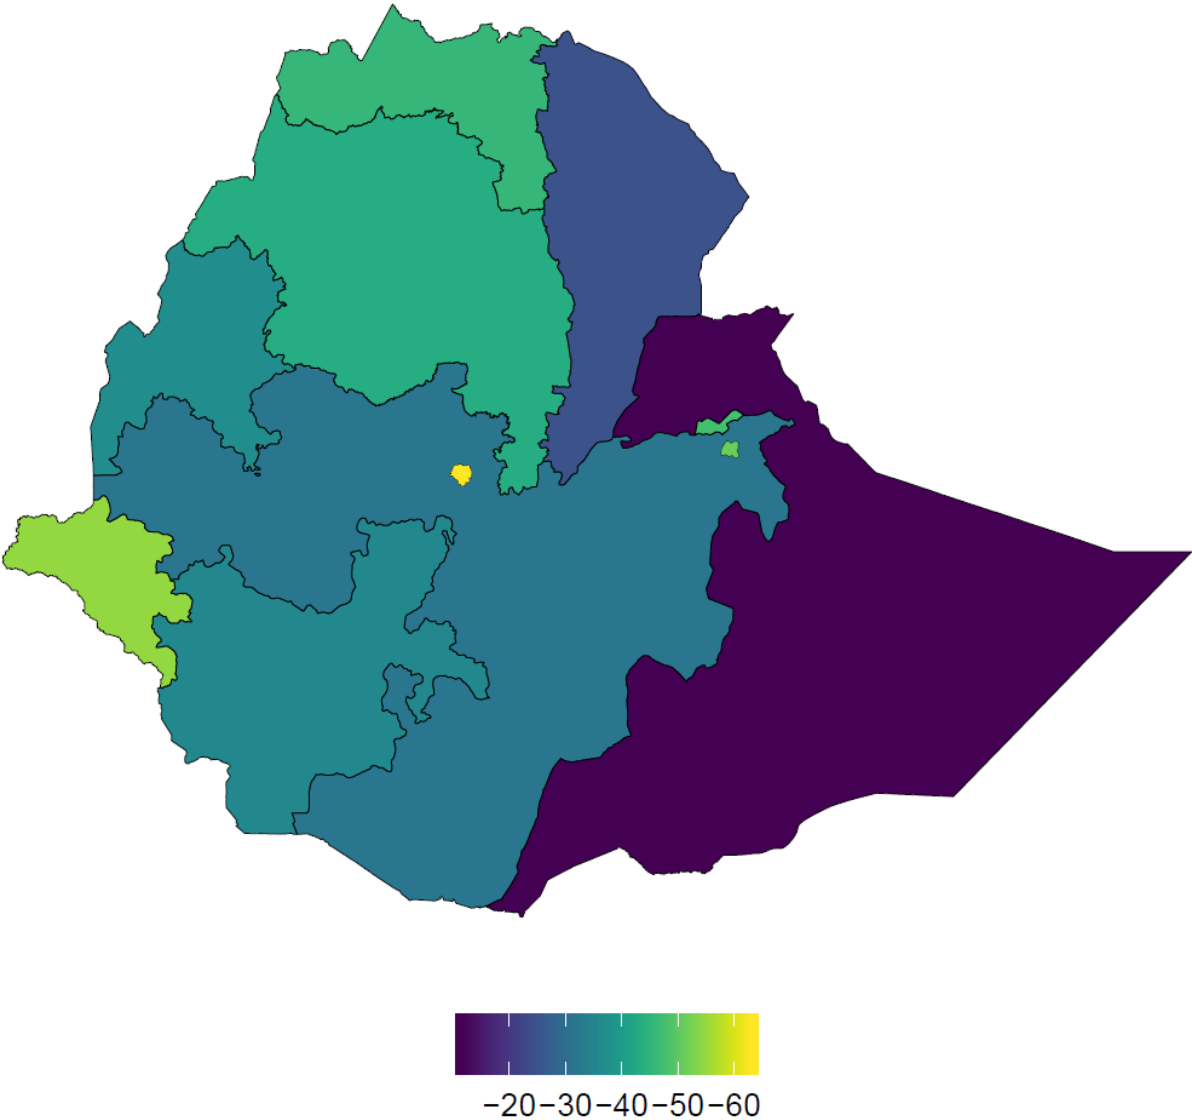

Figure S3. Life expectancy between regions and cities, females and males in Ethiopia, in 2019

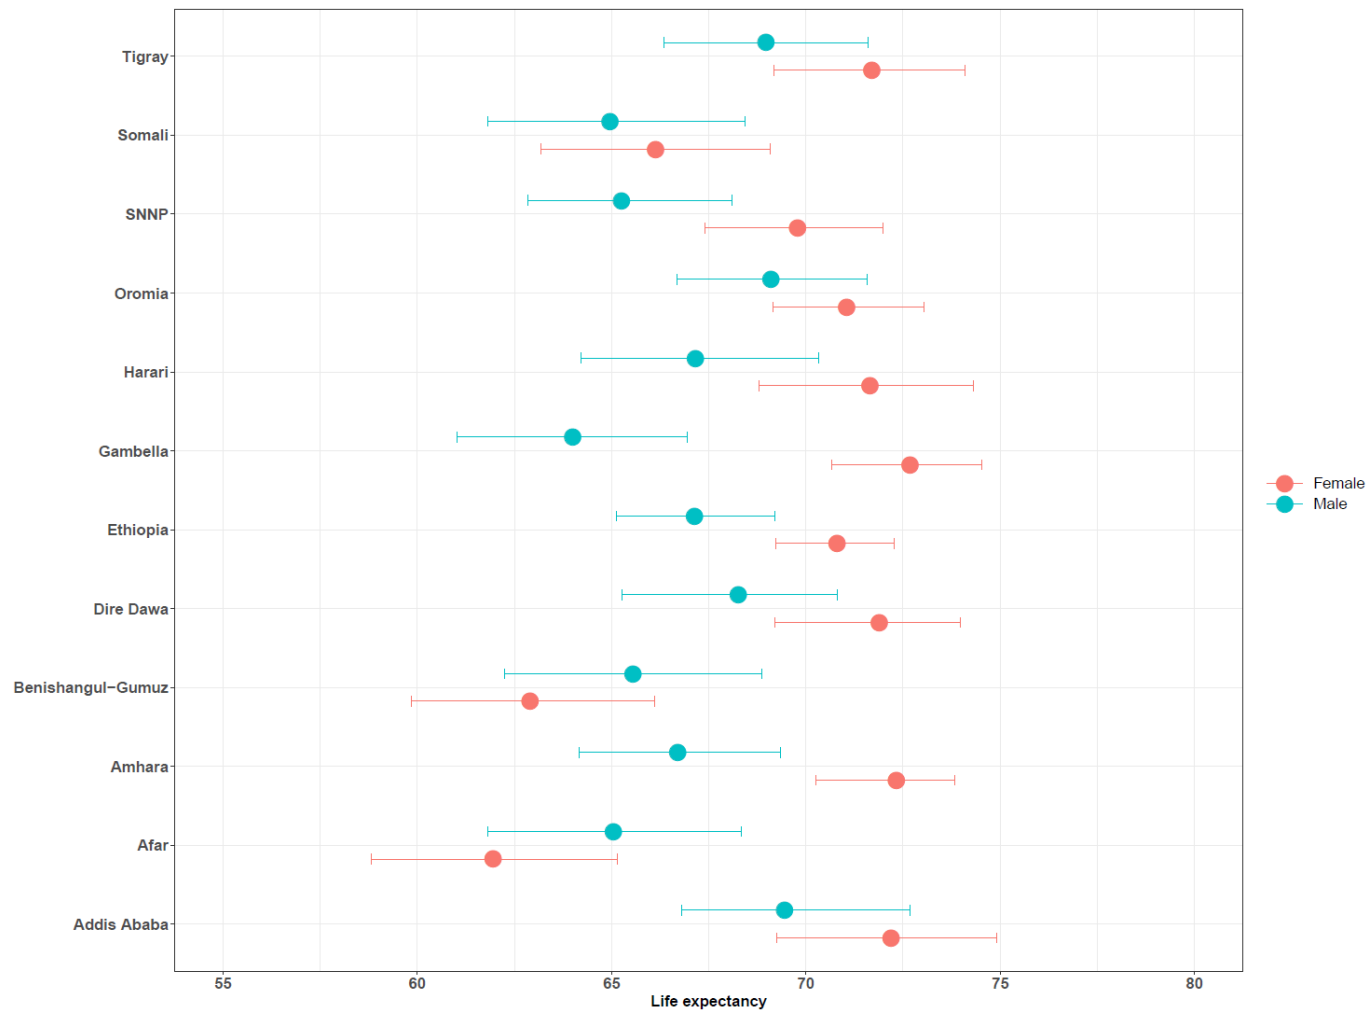

Figure S4. Variation of life expectancy between regions and cities from 1980 to 2019 by sex, in Ethiopia

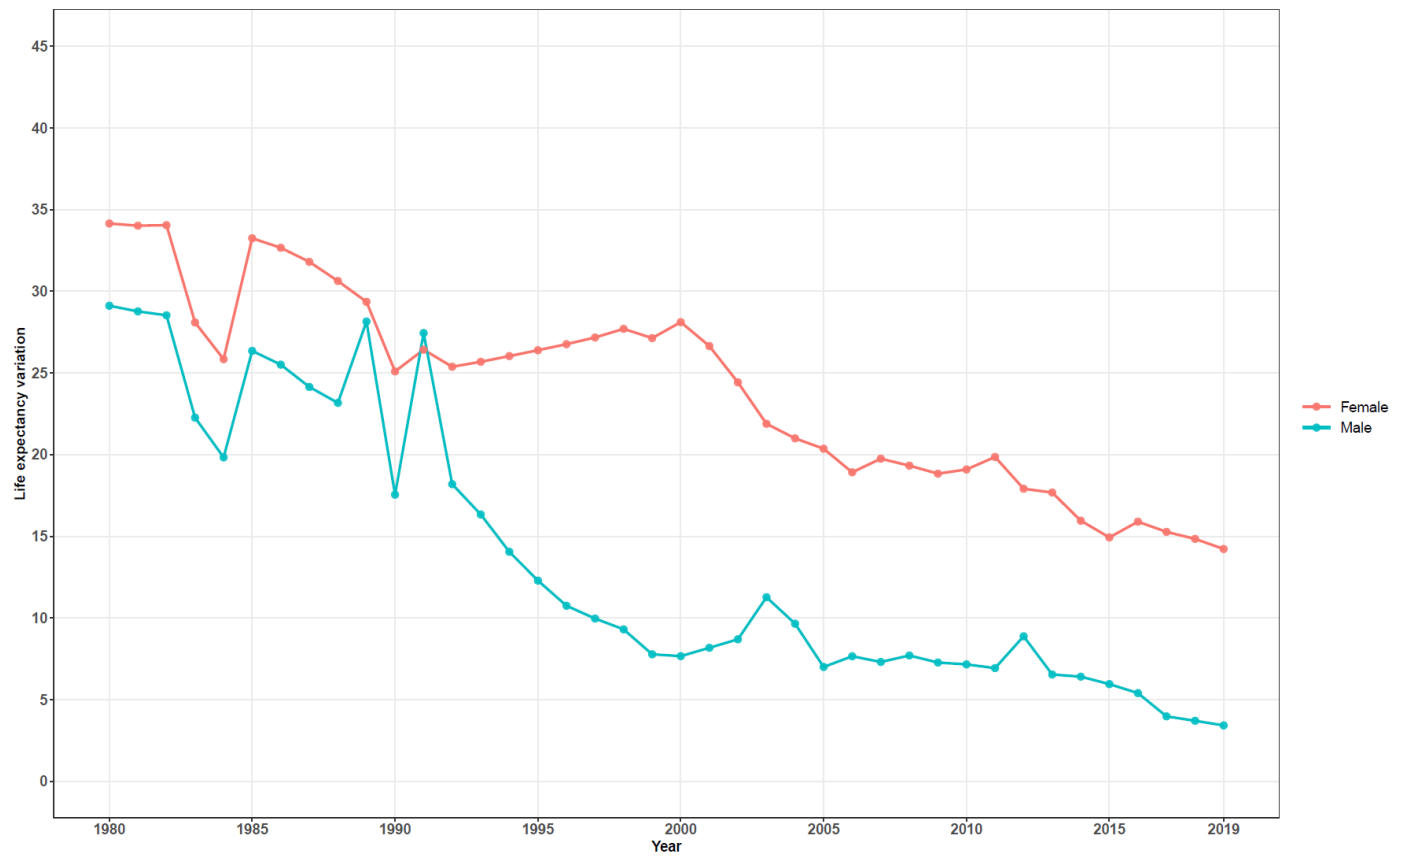

Figure S5. LE percent change by regions and chartered cities in Ethiopia, 1990-2019

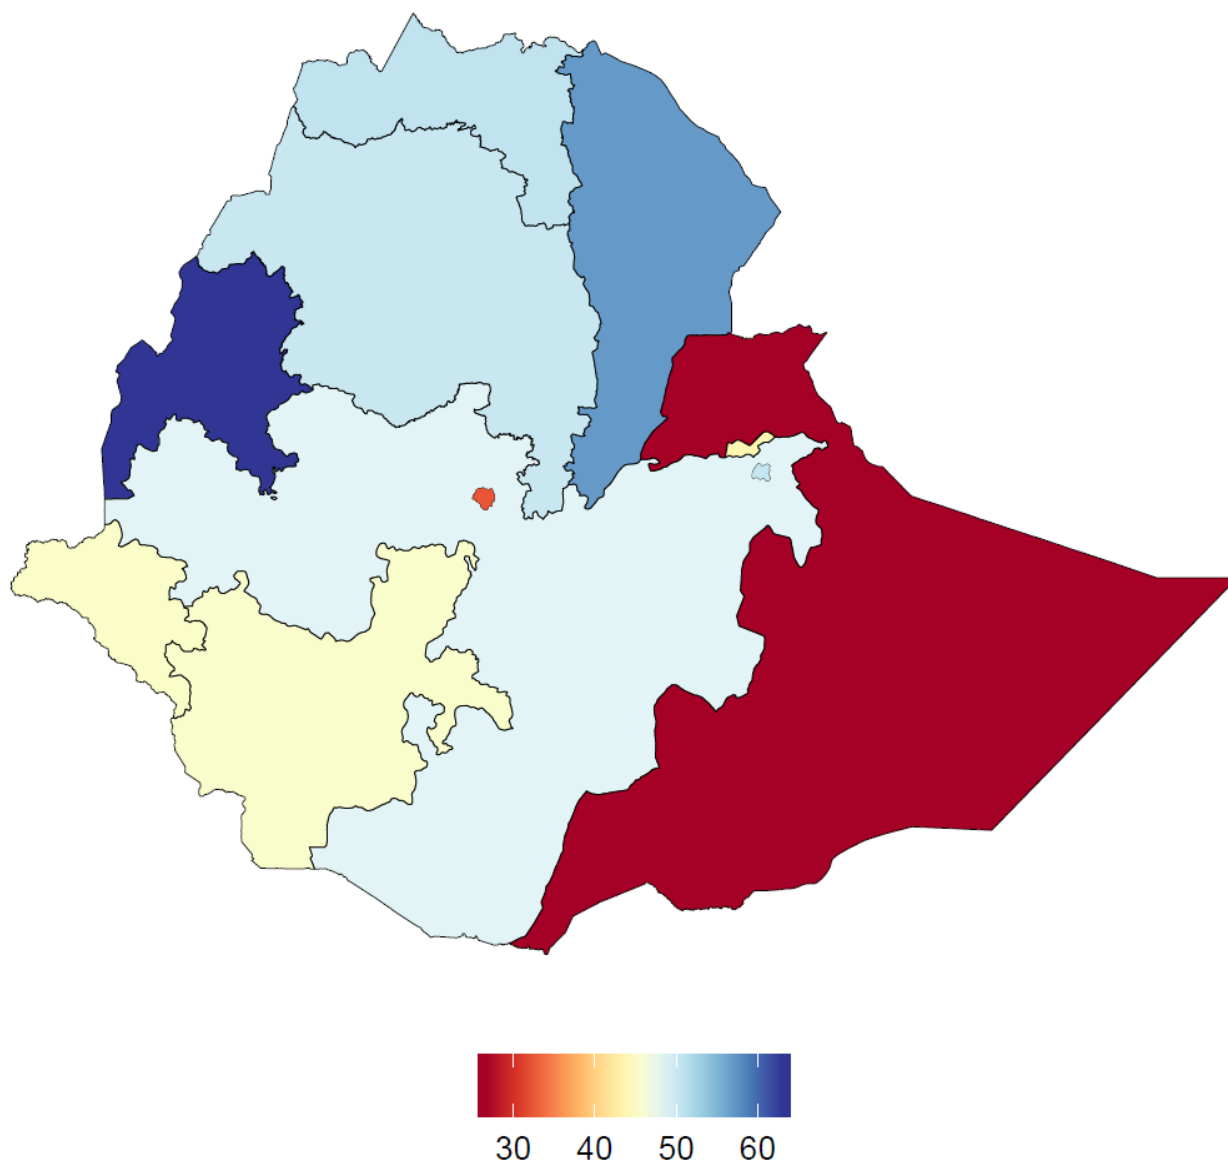

Figure S6. Ranks of causes of death with age-standardised death rate per 100,000 for both sexes, in Ethiopia, 2019

| Rank | Causes of death, 1990        | Death rate/100,000    |  | Rank | Causes of death, 2019        | Death rate/100,000  |
|------|------------------------------|-----------------------|--|------|------------------------------|---------------------|
| 1    | Tuberculosis                 | 317.34(262.65-381.28) |  | 1    | Stroke                       | 90.18(70.62-110.04) |
| 2    | Diarrheal diseases           | 305.77(146.2-483.73)  |  | 2    | Lower respiratory infections | 86.44(75.36-97.65)  |
| 3    | Lower respiratory infections | 223.01(184.74-264.35) |  | 3    | Ischemic heart disease       | 84.24(62.56-105.75) |
| 4    | Stroke                       | 151.89(118.73-182.4)  |  | 4    | Diarrheal diseases           | 76.45(45.12-112.15) |
| 5    | Ischemic heart disease       | 110.26(84.68-140.93)  |  | 5    | Tuberculosis                 | 60.9(50.44-71.5)    |
| 6    | War and conflict             | 100.47(100.47-100.47) |  | 6    | Cirrhosis and other CLD      | 52.18(44.17-62.07)  |
| 7    | Protein-energy malnutrition  | 83.04(55.79-117.63)   |  | 7    | Neonatal disorders           | 44.31(34.92-56.99)  |
| 8    | Neonatal disorders           | 78.42(69-88.94)       |  | 8    | Diabetes mellitus            | 36(31.01-41.43)     |
| 9    | Cirrhosis and other CLDs     | 77.13(46.75-107.53)   |  | 9    | HIV/AIDS                     | 33.56(28.68-39.58)  |
| 10   | Measles                      | 64.19(22.38-130.62)   |  | 10   | Hypertensive heart disease   | 31.97(17.85-53.09)  |
| 11   | Hypertensive heart disease   | 58.65(35.01-88.42)    |  | 11   | COPD                         | 28.32(22.68-33.35)  |
| 12   | Diabetes mellitus            | 57.91(47.8-73.1)      |  | 12   | Alzheimer's disease          | 27.82(6.68-75.12)   |
| 13   | Meningitis                   | 50.24(42.31-59.68)    |  | 13   | Chronic kidney disease       | 26.17(22.48-30.08)  |
| 14   | COPD                         | 46.39(36.4-56.4)      |  | 14   | Road injuries                | 14.51(12.16-17.36)  |
| 15   | Chronic kidney disease       | 39.59(32.49-46.12)    |  | 15   | Meningitis                   | 14.14(12-16.55)     |
| 16   | Maternal disorders           | 39.55(30.63-52.4)     |  | 16   | Protein-energy malnutrition  | 12.9(9.77-16.7)     |
| 17   | Road injuries                | 31.71(25.46-38.69)    |  | 17   | Self-harm                    | 10.13(8.21-12.9)    |
| 18   | HIV/AIDS                     | 31.22(17.32-61.22)    |  | 18   | Breast cancer                | 9.71(7.96-11.64)    |
| 19   | Alzheimer's disease          | 23.16(5.28-66.28)     |  | 19   | Interpersonal violence       | 9.68(7.94-11.89)    |
| 20   | Asthma                       | 22.71(15.51-31.92)    |  | 20   | Falls                        | 9.6(8.09-11.29)     |
| 21   | Self-harm                    | 21.67(16.78-26.42)    |  | 21   | Malaria                      | 9.12(1.77-24.43)    |
| 24   | Interpersonal violence       | 15.59(12.4-19.89)     |  | 23   | Asthma                       | 8.54(6.21-14.61)    |
| 33   | Falls                        | 12.19(9.12-15.35)     |  | 25   | Maternal disorders           | 8.16(5.96-11.04)    |
| 35   | Breast cancer                | 10.71(8.28-13.83)     |  | 68   | Measles                      | 1.45(0.44-3.48)     |
| 44   | Malaria                      | 7.34(1.07-23.73)      |  | 110  | war and conflict             | 0.15(0.14-0.17)     |

|  |                                                           |
|--|-----------------------------------------------------------|
|  | Communicable, maternal, neonatal and nutritional diseases |
|  | Non communicable diseases                                 |
|  | Injuries                                                  |

Figure S7. Trends in YLL rates per 100 000 population for the seven causes with the highest national burden and LE improvement in Ethiopia and regions and chartered cities, 1990–2019

Panel A: HIV/AIDS. Panel B: Tuberculosis. Panel C: Diarrhoeal diseases. Panel D: Lower respiratory infections. Panel E: Measles. Panel F: Protein-energy malnutrition. Panel G: Maternal disorders.

Panel A:

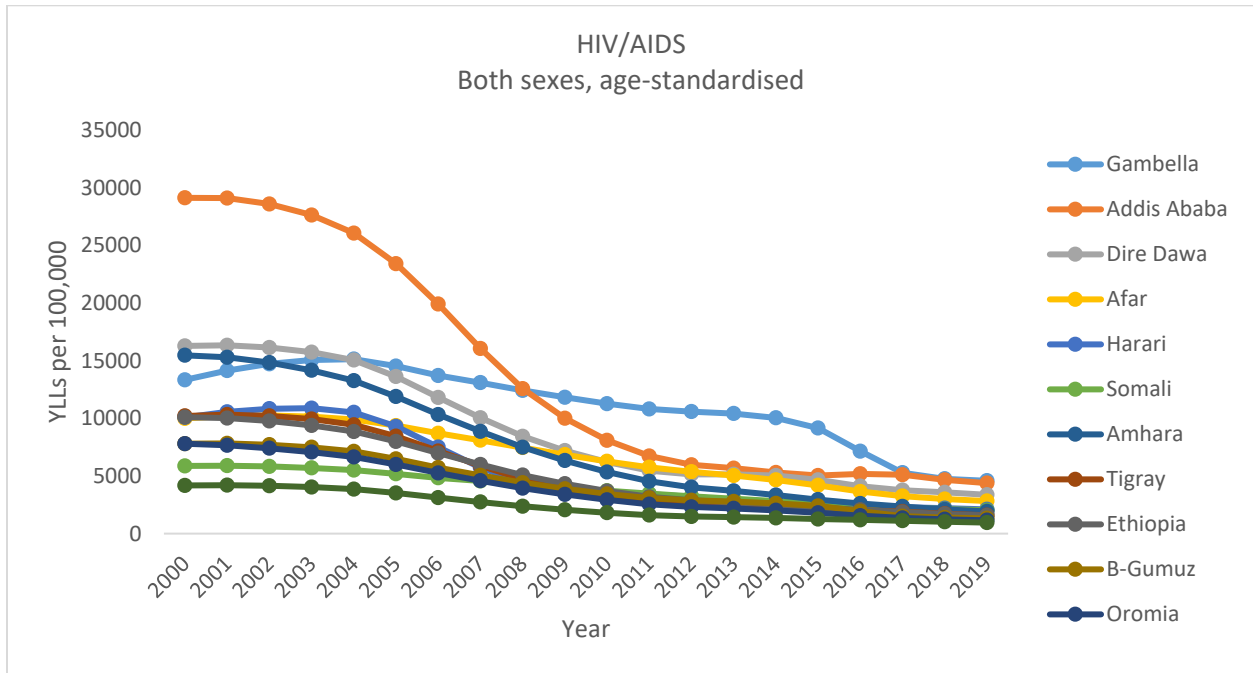

Panel B:

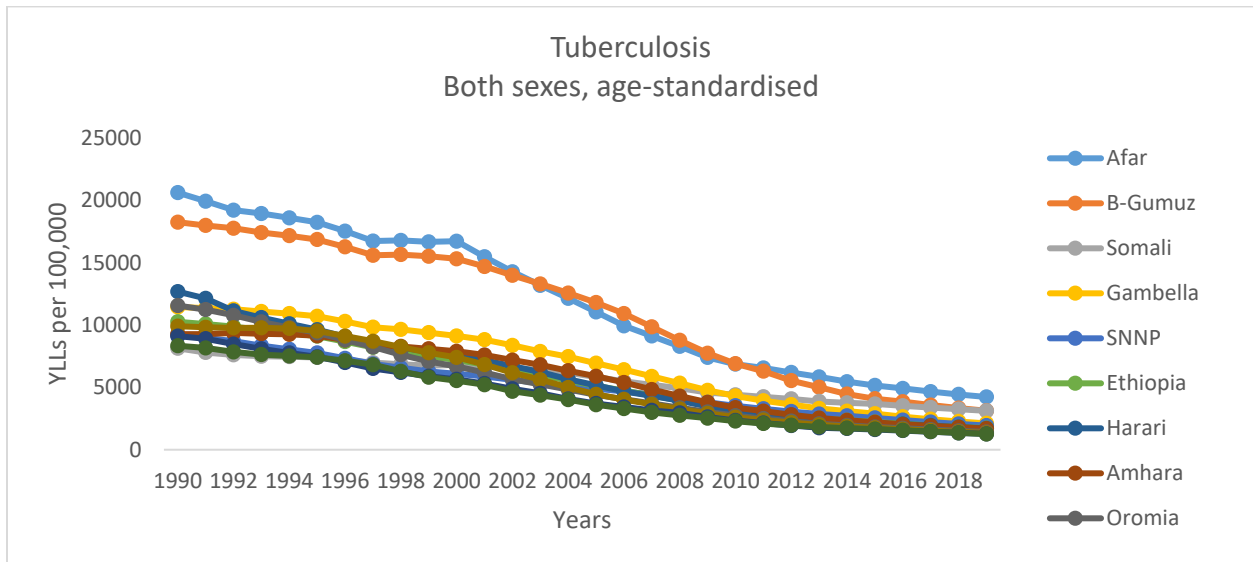

Panel C:

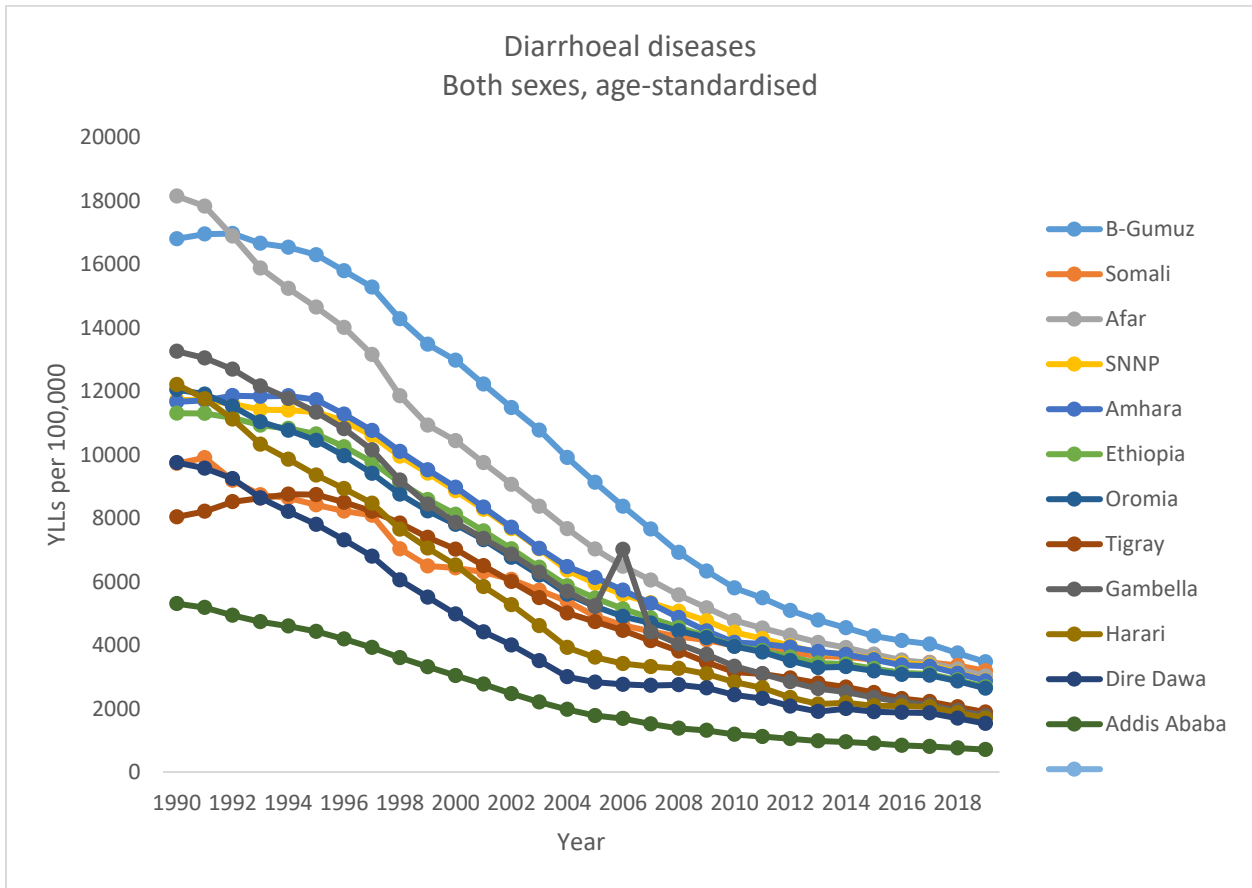

Panel D:

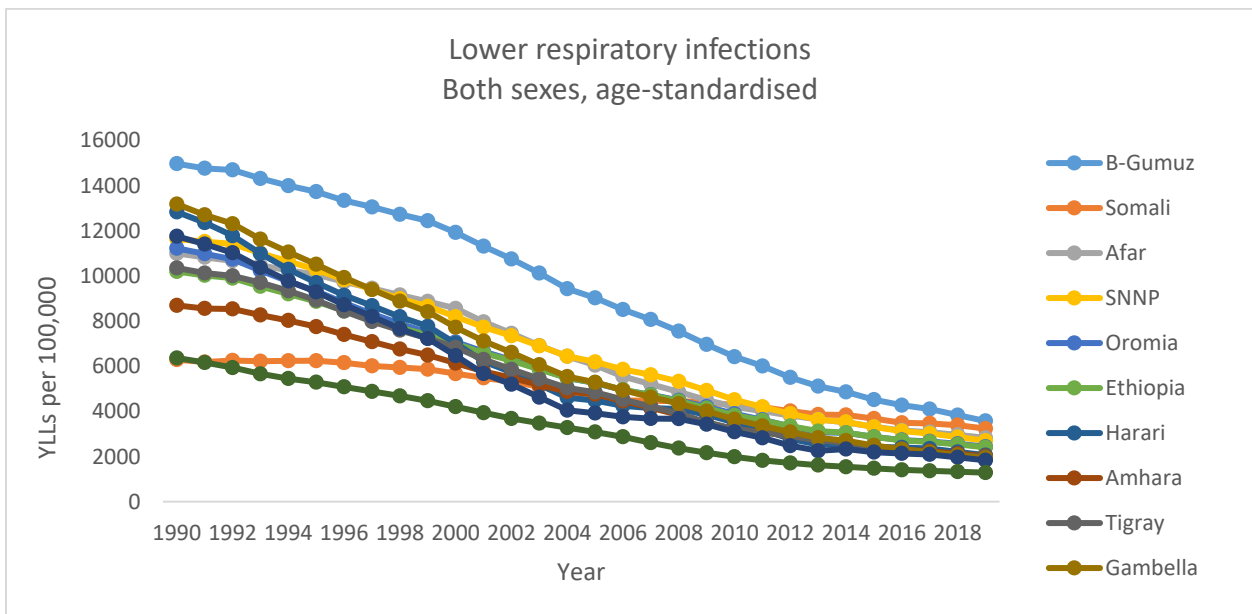

Panel E:



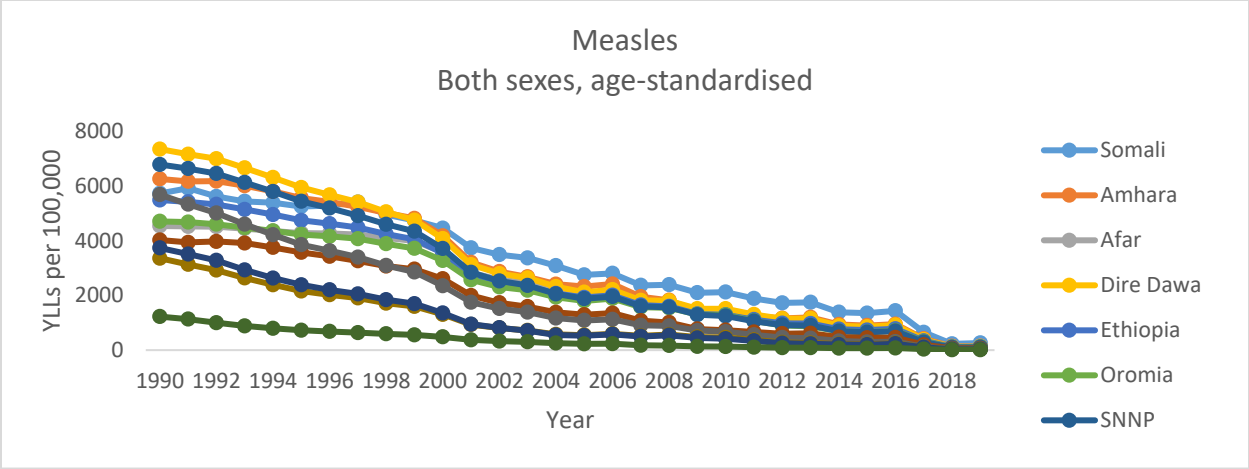

Panel F:

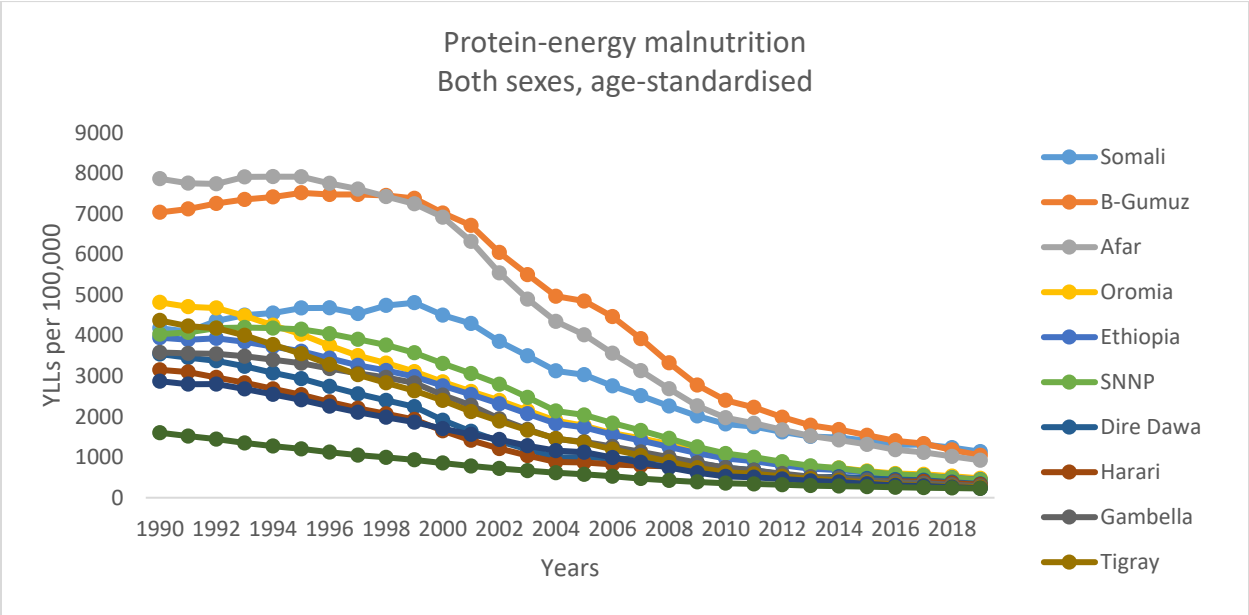

Panel G:

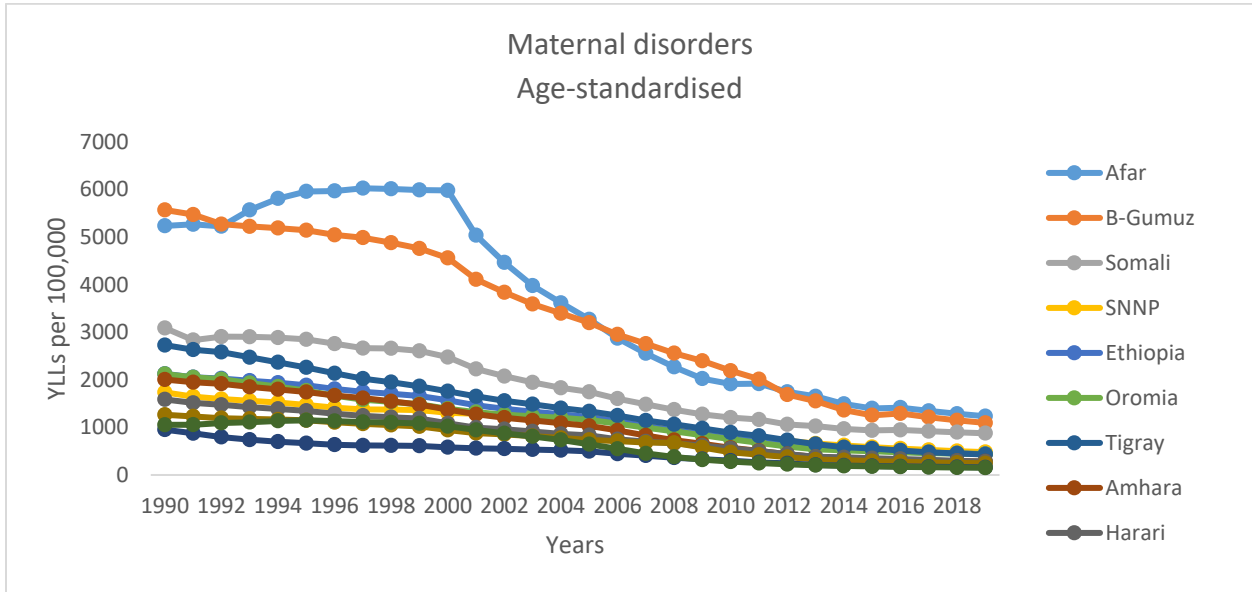

## Tables

Table S1. SDI variance between 9 regions and 2 chartered cities in Ethiopia, 1990-2019

| Year                     | Ethiopia | Addis Ababa | Afar | Amhara | B/Gumuz | Dire Dawa | Gambella | Harari | Oromia | Somali | SNNP | Tigray | SDI Variance |
|--------------------------|----------|-------------|------|--------|---------|-----------|----------|--------|--------|--------|------|--------|--------------|
| 1990                     | 0.13     | 0.38        | 0.08 | 0.10   | 0.10    | 0.26      | 0.16     | 0.27   | 0.11   | 0.04   | 0.11 | 0.13   | 0.01         |
| 1991                     | 0.13     | 0.39        | 0.07 | 0.10   | 0.10    | 0.27      | 0.16     | 0.27   | 0.10   | 0.02   | 0.11 | 0.13   | 0.01         |
| 1992                     | 0.14     | 0.41        | 0.08 | 0.11   | 0.10    | 0.29      | 0.17     | 0.29   | 0.11   | 0.04   | 0.12 | 0.14   | 0.01         |
| 1993                     | 0.14     | 0.42        | 0.08 | 0.11   | 0.10    | 0.30      | 0.18     | 0.30   | 0.12   | 0.05   | 0.12 | 0.14   | 0.01         |
| 1994                     | 0.14     | 0.43        | 0.08 | 0.11   | 0.10    | 0.30      | 0.18     | 0.31   | 0.12   | 0.05   | 0.12 | 0.14   | 0.01         |
| 1995                     | 0.15     | 0.43        | 0.08 | 0.11   | 0.10    | 0.31      | 0.19     | 0.31   | 0.12   | 0.05   | 0.12 | 0.14   | 0.01         |
| 1996                     | 0.15     | 0.44        | 0.08 | 0.11   | 0.10    | 0.31      | 0.19     | 0.31   | 0.12   | 0.04   | 0.12 | 0.14   | 0.01         |
| 1997                     | 0.15     | 0.44        | 0.08 | 0.11   | 0.11    | 0.31      | 0.19     | 0.31   | 0.12   | 0.02   | 0.12 | 0.15   | 0.02         |
| 1998                     | 0.16     | 0.45        | 0.09 | 0.12   | 0.11    | 0.32      | 0.20     | 0.32   | 0.13   | 0.05   | 0.13 | 0.15   | 0.02         |
| 1999                     | 0.16     | 0.46        | 0.09 | 0.12   | 0.12    | 0.33      | 0.20     | 0.33   | 0.13   | 0.05   | 0.13 | 0.16   | 0.02         |
| 2000                     | 0.16     | 0.46        | 0.09 | 0.12   | 0.11    | 0.32      | 0.20     | 0.32   | 0.13   | 0.04   | 0.13 | 0.16   | 0.02         |
| 2001                     | 0.16     | 0.46        | 0.09 | 0.12   | 0.12    | 0.32      | 0.20     | 0.31   | 0.13   | 0.02   | 0.13 | 0.16   | 0.02         |
| 2002                     | 0.16     | 0.46        | 0.09 | 0.13   | 0.12    | 0.32      | 0.20     | 0.32   | 0.13   | 0.02   | 0.14 | 0.17   | 0.02         |
| 2003                     | 0.17     | 0.47        | 0.09 | 0.13   | 0.12    | 0.33      | 0.21     | 0.32   | 0.14   | 0.02   | 0.14 | 0.17   | 0.02         |
| 2004                     | 0.17     | 0.47        | 0.10 | 0.14   | 0.13    | 0.33      | 0.21     | 0.33   | 0.14   | 0.03   | 0.15 | 0.18   | 0.02         |
| 2005                     | 0.18     | 0.49        | 0.11 | 0.15   | 0.14    | 0.34      | 0.23     | 0.34   | 0.15   | 0.05   | 0.16 | 0.19   | 0.02         |
| 2006                     | 0.19     | 0.50        | 0.12 | 0.16   | 0.15    | 0.35      | 0.24     | 0.35   | 0.16   | 0.06   | 0.17 | 0.20   | 0.02         |
| 2007                     | 0.21     | 0.51        | 0.13 | 0.17   | 0.16    | 0.36      | 0.25     | 0.36   | 0.17   | 0.08   | 0.18 | 0.22   | 0.02         |
| 2008                     | 0.22     | 0.52        | 0.14 | 0.18   | 0.18    | 0.38      | 0.27     | 0.37   | 0.19   | 0.09   | 0.20 | 0.23   | 0.02         |
| 2009                     | 0.23     | 0.53        | 0.16 | 0.20   | 0.19    | 0.39      | 0.29     | 0.39   | 0.20   | 0.11   | 0.21 | 0.25   | 0.02         |
| 2010                     | 0.25     | 0.55        | 0.17 | 0.21   | 0.21    | 0.40      | 0.30     | 0.40   | 0.22   | 0.12   | 0.23 | 0.26   | 0.02         |
| 2011                     | 0.26     | 0.56        | 0.18 | 0.22   | 0.22    | 0.42      | 0.32     | 0.41   | 0.23   | 0.13   | 0.24 | 0.27   | 0.02         |
| 2012                     | 0.27     | 0.57        | 0.19 | 0.23   | 0.24    | 0.42      | 0.33     | 0.42   | 0.24   | 0.14   | 0.25 | 0.28   | 0.02         |
| 2013                     | 0.28     | 0.58        | 0.20 | 0.25   | 0.25    | 0.44      | 0.34     | 0.43   | 0.25   | 0.15   | 0.26 | 0.30   | 0.02         |
| 2014                     | 0.29     | 0.59        | 0.21 | 0.26   | 0.26    | 0.45      | 0.35     | 0.44   | 0.27   | 0.16   | 0.28 | 0.31   | 0.02         |
| 2015                     | 0.30     | 0.60        | 0.22 | 0.27   | 0.27    | 0.46      | 0.37     | 0.45   | 0.27   | 0.16   | 0.29 | 0.32   | 0.02         |
| 2016                     | 0.31     | 0.61        | 0.23 | 0.28   | 0.28    | 0.47      | 0.38     | 0.46   | 0.29   | 0.17   | 0.30 | 0.33   | 0.02         |
| 2017                     | 0.32     | 0.62        | 0.24 | 0.29   | 0.30    | 0.48      | 0.39     | 0.48   | 0.30   | 0.18   | 0.31 | 0.34   | 0.02         |
| 2018                     | 0.33     | 0.63        | 0.25 | 0.30   | 0.31    | 0.49      | 0.40     | 0.49   | 0.31   | 0.19   | 0.32 | 0.35   | 0.02         |
| 2019                     | 0.34     | 0.64        | 0.26 | 0.31   | 0.32    | 0.50      | 0.41     | 0.49   | 0.32   | 0.19   | 0.33 | 0.36   | 0.02         |
| % change from, 1990-2019 |          |             |      |        |         |           |          |        |        |        |      |        | -54%         |

Table S2. LE for regions and chartered cities, both sexes, females and males in Ethiopia, 1990 to 2019

| Location       | Both Sex                   |                            |                                  | Females                    |                            |                                  | Males                      |                            |                              |
|----------------|----------------------------|----------------------------|----------------------------------|----------------------------|----------------------------|----------------------------------|----------------------------|----------------------------|------------------------------|
|                | LE ,1990<br>(95% UI)       | LE,2019<br>(95% UI)        | LE<br>increase,<br>1990-<br>2019 | LE ,1990<br>(95% UI)       | LE,2019(95<br>% UI)        | LE<br>increase,<br>1990-<br>2019 | LE<br>,1990(95%<br>UI)     | LE,2019(<br>95% UI)        | LE<br>increase,<br>1990-2019 |
| Ethiopia       | 46.91<br>(45.71-<br>48.11) | 68.84<br>(67.51-<br>70.18) | 21.93                            | 49.5<br>(48.04-<br>51.05)  | 70.8<br>(69.24-<br>72.27)  | 21.3                             | 44.71<br>(43.25-<br>46.15) | 67.13<br>(65.12-<br>69.2)  | 22.42                        |
| Addis<br>Ababa | 53.55<br>(51.67-<br>55.41) | 70.86<br>(68.91-<br>72.65) | 17.31                            | 55.05<br>(52.43-<br>57.83) | 72.19<br>(69.26-<br>74.92) | 17.14                            | 52.03<br>(49.65-<br>54.19) | 69.45<br>(66.8-<br>72.68)  | 17.42                        |
| Afar           | 40.61<br>(38.71-<br>42.68) | 63.74<br>(61.53-<br>66.01) | 23.13                            | 39.54<br>(36.7-<br>42.61)  | 61.95<br>(58.83-<br>65.15) | 22.41                            | 41.78<br>(39.6-<br>44.17)  | 65.04<br>(61.82-<br>68.35) | 23.26                        |
| Amhara         | 46.18<br>(44.57-<br>47.7)  | 69.3<br>(67.54-71)         | 23.12                            | 48.51<br>(46.33-<br>50.77) | 72.33<br>(70.25-<br>73.83) | 23.82                            | 44.17<br>(42.45-<br>46.02) | 66.7<br>(64.17-<br>69.34)  | 22.53                        |
| B-Gumuz        | 39.44<br>(37.29-<br>41.37) | 64.28<br>(61.99-<br>66.63) | 24.84                            | 37.89<br>(35.07-<br>40.81) | 62.91<br>(59.84-<br>66.12) | 25.02                            | 41.23<br>(38.86-<br>43.68) | 65.55<br>(62.24-<br>68.86) | 24.32                        |
| Dire<br>Dawa   | 48.72<br>(46.63-<br>51.02) | 70.04<br>(68.06-<br>71.85) | 21.32                            | 52.1<br>(49.01-<br>55.41)  | 71.89<br>(69.2-<br>73.97)  | 19.79                            | 45.73<br>(43.63-<br>48.05) | 68.26<br>(65.28-<br>70.81) | 22.53                        |
| Gambella       | 46.6<br>(44.64-<br>48.66)  | 67.76<br>(65.63-<br>69.68) | 21.16                            | 52.8<br>(49.92-<br>55.96)  | 72.68<br>(70.66-<br>74.53) | 19.88                            | 41.39<br>(39.27-<br>43.52) | 64<br>(61.02-<br>66.96)    | 22.61                        |
| Harari         | 46.17<br>(44.09-<br>48.45) | 69.37<br>(67.34-<br>71.44) | 23.20                            | 50.47<br>(47.15-<br>53.85) | 71.65<br>(68.79-<br>74.3)  | 21.18                            | 41.85<br>(39.83-<br>44.2)  | 67.16<br>(64.21-<br>70.34) | 25.31                        |
| Oromia         | 47.24<br>(45.71-<br>48.78) | 70.03<br>(68.39-<br>71.58) | 22.79                            | 49.77<br>(47.58-<br>51.9)  | 71.05<br>(69.16-<br>73.03) | 21.28                            | 45.11<br>(43.33-<br>46.95) | 69.1<br>(66.68-<br>71.59)  | 23.99                        |
| Somali         | 51.69<br>(49.8-<br>53.76)  | 65.44<br>(63.13-<br>67.78) | 13.75                            | 49.45<br>(46.95-<br>52.25) | 66.14<br>(63.19-<br>69.08) | 16.69                            | 54.64<br>(52.35-57)        | 64.96<br>(61.81-<br>68.42) | 10.32                        |
| SNNP           | 46.28<br>(44.69-<br>47.87) | 67.36<br>(65.66-<br>69.09) | 21.08                            | 49.7<br>(47.45-<br>52.1)   | 69.79<br>(67.39-<br>71.98) | 20.09                            | 43.67(41.7<br>6-45.56)     | 65.26(62.<br>84-68.09)     | 21.59                        |
| Tigray         | 46.66(44.79<br>-48.6)      | 70.3(68.5<br>2-72.19)      | 23.64                            | 48.96(46.<br>58-51.61)     | 71.7(69.18-<br>74.1)       | 22.74                            | 44.61(42.4<br>7-46.85)     | 68.97(66.<br>34-71.59)     | 24.36                        |

Table S3. LE and TFR variance and percent change between regions and chartered cities in Ethiopia, 1990-2019

| Years                    | LE          | LE            | LE          | TFR        |
|--------------------------|-------------|---------------|-------------|------------|
|                          | <i>Male</i> | <i>Female</i> | <i>Both</i> | <i>TFR</i> |
| 1990                     | 19.29       | 27.52         | 16.68       | 0.723      |
| 2000                     | 8.43        | 30.60         | 13.03       | 1.128      |
| 2010                     | 7.85        | 20.83         | 11.25       | 0.895      |
| 2019                     | 3.75        | 15.48         | 6.43        | 1.122      |
| % change from, 1990-2019 | 81%         | 44%           | 61%         | -55%       |

Table S4. Female LE and TFR in regions and chartered cities in Ethiopia, 2019

| Location    | Female LE, 2019 | Level | TFR, 2019 | Level |
|-------------|-----------------|-------|-----------|-------|
| Addis Ababa | 72.19           | High  | 1.50      | Low   |
| Dire Dawa   | 71.89           | High  | 2.95      | Low   |
| Gambella    | 72.68           | High  | 2.79      | Low   |
| Amhara      | 72.33           | High  | 3.87      | Low   |
| Harari      | 71.65           | High  | 3.01      | Low   |
| Tigray      | 71.7            | High  | 3.65      | Low   |
| Oromia      | 71.05           | High  | 4.98      | High  |
| Somali      | 66.14           | Low   | 6.41      | High  |
| B-Gumuz     | 62.91           | Low   | 4.32      | High  |
| SNNP        | 69.79           | Low   | 4.59      | High  |
| Afar        | 61.95           | Low   | 4.95      | High  |

Table S5. Age-standardised death, YLL, YLD and DALY rates per 100 000 populations for all causes combined and leading ten causes in Ethiopia's regions and cities, both sexes, 2019

|                            | Causes and conditions        | Ethiopia                   | Addis Ababa                  | Afar                          | Amhara                     | B/Gumuz                      | Dire Dawa                  | Gambella                     | Harari                       | Oromia                         | Somali                           | SNNP                           | Tigray                         |
|----------------------------|------------------------------|----------------------------|------------------------------|-------------------------------|----------------------------|------------------------------|----------------------------|------------------------------|------------------------------|--------------------------------|----------------------------------|--------------------------------|--------------------------------|
| Death both sexes           | All causes                   | 993.52<br>(914.97-1070.55) | 943.24<br>(836.87-1055.38)   | 1353.38<br>(1195.69-1526.19)  | 955.41<br>(855.37-1065.85) | 1215.37<br>(1046.64-1394.05) | 930.76<br>(824.93-1054.72) | 1097.57<br>(985.2-1238.38)   | 981.41<br>(865.09-1101.04)   | 931.40(84<br>2.89-<br>1028.21) | 1175.51<br>(1007.84-<br>1366.86) | 1091.62<br>(982.79-<br>1211.4) | 982.61<br>(869.47-<br>1098.19) |
|                            | Stroke                       | 90.18(70.62-<br>110.04)    | 116.16(96.<br>78-<br>137.59) | 129.95(10<br>1.08-<br>160.22) | 89.38(63.8<br>5-113.96)    | 114.07(87.<br>35-<br>144.52) | 90.11(66.5<br>1-113.88)    | 113.51(82.<br>92-<br>142.58) | 102.69(78.<br>39-<br>126.79) | 77.46(57.5<br>3-98.33)         | 106.3(76.9<br>2-137.63)          | 90.64(70.5<br>3-112.85)        | 117.89(91<br>.08-<br>147.91)   |
|                            | Lower respiratory infections | 86.44(75.36-<br>97.65)     | 59.41(49.8<br>1-71.44)       | 103.71(86.<br>62-<br>122.62)  | 74.37(59.4<br>-91.02)      | 101.84(84.<br>02-<br>121.72) | 69.94(56.5<br>5-84)        | 82.41(68.3<br>9-97.19)       | 77.06(63.0<br>9-92.52)       | 89.33(75.9<br>1-103.18)        | 97.58(79.2<br>6-118.67)          | 99(83.81-<br>116.65)           | 95.97(67.<br>34-<br>123.71)    |
|                            | Ischemic heart disease       | 84.24(62.56-<br>105.75)    | 116.47(93.<br>99-<br>139.84) | 118.22(88.<br>68-<br>154.84)  | 82.64(57.2<br>5-108.94)    | 103.98(76.<br>61-<br>136.98) | 84.28(57.6<br>2-109.99)    | 106.02(75.<br>34-<br>139.83) | 91.96(67.7<br>1-116.29)      | 74.99(52.0<br>8-97.73)         | 93.89(67-<br>126.02)             | 86.85(65.0<br>2-111.24)        | 84.63(69.<br>26-<br>100.15)    |
|                            | Diarrheal diseases           | 76.45(45.12-<br>112.15)    | 24.42(9.55<br>-44.34)        | 101.11(55.<br>82-<br>151.57)  | 83.64(42.9<br>-130.29)     | 106.56(58.<br>68-<br>168.74) | 49.08(26.1<br>5-79.26)     | 66.2(31.72<br>-106.05)       | 52.24(26.8<br>1-86.27)       | 71.44(43.9<br>2-110.98)        | 99.69(55.9<br>9-155.16)          | 83.72(51.2<br>-124.32)         | 61.69(32.<br>58-98.04)         |
|                            | Tuberculosis                 | 60.9(50.44-<br>71.5)       | 45.2(37.71<br>-55.2)         | 140.35(11<br>3.05-<br>171.19) | 59.77(42.3<br>6-79.78)     | 100.81(81.<br>21-<br>123.74) | 47.07(36.5<br>8-58.63)     | 76.77(61.2<br>9-94.68)       | 61.04(46.0<br>6-75.71)       | 52.46(42.9<br>4-64.03)         | 105.8(78.4<br>-148.83)           | 67.41(55.7<br>3-81.7)          | 50.18(39.<br>61-62.96)         |
|                            | Cirrhosis and other CLD      | 52.18(44.17-<br>62.07)     | 47.21(38.1<br>4-58.42)       | 63.37(48.4<br>1-82.03)        | 50.3(37.16<br>-73.63)      | 55.8(42.99<br>-73.42)        | 47.32(35.8<br>-63.72)      | 55.58(44.5<br>3-68.52)       | 50.43(39.3<br>5-64.7)        | 49.92(40.8<br>5-60.24)         | 55.48(41.2<br>3-75.1)            | 62.08(50.8<br>9-74.44)         | 33.76(19.<br>21-50.31)         |
|                            | Neonatal disorders           | 44.31(34.92-<br>56.99)     | 12.89(8.85<br>-18.16)        | 37.53(28.9<br>9-49.26)        | 48.01(37.4<br>4-62.34)     | 53.97(41.4<br>5-71.03)       | 40.5(30.27<br>-53.58)      | 31.55(23.5<br>7-41.73)       | 40.2(30.05<br>-53.01)        | 44.61(35.4<br>7-56.81)         | 48.92(38.5<br>8-62.57)           | 44.61(34.6<br>-58.11)          | 36.64(19.<br>77-61.88)         |
|                            | Diabetes mellitus            | 36(31.01-<br>41.43)        | 39.85(33-<br>47.63)          | 44.72(37.4<br>4-53.71)        | 31.52(25.1<br>3-39.14)     | 39.14(32.1<br>2-47.98)       | 34.1(26.7-<br>42.03)       | 38.48(31.5<br>2-46.44)       | 37.03(29.1<br>8-45.21)       | 35.35(29.1<br>6-41.8)          | 35.99(28.4<br>9-44.91)           | 42.62(35.4<br>2-50.85)         | 45.32(36.<br>11-56.03)         |
|                            | HIV/AIDS                     | 33.56(28.68-<br>39.58)     | 95.61(71.2<br>3-125.38)      | 60.67(40.5<br>6-86.47)        | 40.12(29.0<br>7-53.18)     | 26.19(14.9<br>-43.64)        | 67.09(40.5<br>1-103.01)    | 91.96(56.8<br>5-139.75)      | 38.84(24.5<br>-65.11)        | 23.86(16.3<br>8-33.96)         | 42.96(31.4<br>-59.89)            | 20.22(13.6<br>1-29.17)         | 30.77(23.<br>75-40.55)         |
| Hypertensive heart disease | 31.97(17.85-<br>53.09)       | 34.42(16.9<br>1-54.07)     | 37.37(20.8<br>9-59.95)       | 31.51(16.7<br>6-54.86)        | 36.42(19.5<br>4-59.42)     | 31.79(16.0<br>6-56.11)       | 34.41(18.7<br>2-62.25)     | 36.17(18.4<br>3-61.89)       | 29.85(16.1<br>2-51.79)       | 31.74(16.6<br>8-56.83)         | 34.04(20.0<br>2-53.15)           | 28.76(6.8<br>1-76.63)          |                                |

|                        | <b>Causes and conditions</b>               | <b>Ethiopia</b>             | <b>Addis Ababa</b>          | <b>Afar</b>                 | <b>Amhara</b>               | <b>B/Gumuz</b>              | <b>Dire Dawa</b>            | <b>Gambella</b>             | <b>Harari</b>               | <b>Oromia</b>               | <b>Somali</b>               | <b>SNNP</b>                 | <b>Tigray</b>               |
|------------------------|--------------------------------------------|-----------------------------|-----------------------------|-----------------------------|-----------------------------|-----------------------------|-----------------------------|-----------------------------|-----------------------------|-----------------------------|-----------------------------|-----------------------------|-----------------------------|
| <i>YLLs both sexes</i> | All causes                                 | 30188.15(27335.78-33522.76) | 24587.96(21376.63-28479.55) | 40646.83(35269.66-46519.61) | 29627.03(26153.31-33252.03) | 40246.93(34763.93-46458.09) | 27923.42(24318.73-31972.61) | 31423.03(27436.21-36073.92) | 29023.21(25052.82-33498.29) | 27993.55(24822.94-31877.11) | 37678.08(32787.59-43171.12) | 32890.51(29184.45-37155.55) | 26435.52(22998.71-30181.61) |
|                        | Neonatal disorders                         | 3936(3102.02-5062.36)       | 1144.89(786.19-1613.71)     | 3334.17(2575.7-4376.74)     | 4263.88(3325.45-5535.56)    | 4794.17(3682.23-6308.66)    | 3598.47(2689.6-4760.63)     | 2802.72(2094.7-3707.8)      | 3571.17(2669.98-4709.61)    | 3962.85(3151.45-5047.45)    | 4346.19(3427.41-5558.73)    | 3963.41(3074.49-5162.24)    | 2734.15(2110.52-3602.85)    |
|                        | Diarrheal diseases                         | 2679.41(1823.93-3760.22)    | 706.94(346.09-1160)         | 3028.74(1858.68-4359.95)    | 2872.53(1619.57-4669.36)    | 3468.05(2075.83-5236.29)    | 1527.28(863.89-2479.98)     | 1765.71(941.39-2671.89)     | 1696.78(949.97-2706.74)     | 2636.66(1799.45-3752.16)    | 3189.06(2085.43-4620.42)    | 2883.22(1933.89-4093.83)    | 1885.83(1160.09-2787.08)    |
|                        | Lower respiratory infections               | 2404.57(2059.41-2833.31)    | 1285.69(1065.07-1561.83)    | 2824.7(2323.08-3414.07)     | 2016.49(1551.49-2541.83)    | 3571.17(2772.41-4510.79)    | 1832.81(1407.35-2363.18)    | 1937.46(1567.7-2344.65)     | 2060.45(1595.62-2623.15)    | 2433.84(2042.25-2879.55)    | 3236.48(2537.45-4006.03)    | 2698.2(2243.52-3250.28)     | 1977.15(1593.94-2395.05)    |
|                        | Tuberculosis                               | 1729.19(1421.57-2049.86)    | 1257.74(987.65-1637.78)     | 4224.43(3303.11-5286.23)    | 1694(1206.7-2252.3)         | 3122.54(2515.9-3818.3)      | 1265.73(961.97-1615.11)     | 2108.48(1620.78-2668.38)    | 1708.9(1268.87-2211.91)     | 1424.64(1145.31-1764.27)    | 3114.68(2316.65-4344.2)     | 1932.74(1568.38-2350.92)    | 1353.68(1052.73-1707.25)    |
|                        | Stroke                                     | 1639.45(1277.27-1998.83)    | 2076.73(1734.67-2511.62)    | 2643.28(2063.5-3255.2)      | 1585.87(1113.95-2048.27)    | 2265.59(1735.78-2873.04)    | 1572.81(1132.77-2021.77)    | 2089.66(1505.93-2660.73)    | 1844.51(1379.32-2326.34)    | 1382.54(1033.51-1753.97)    | 2029.76(1472.25-2610.22)    | 1694.69(1329.04-2112.14)    | 2065.02(1571.61-2618.6)     |
|                        | HIV/AIDS                                   | 1581.17(1311.51-1935.43)    | 4381.86(3213.4-5800.05)     | 2828.57(1852.03-4134.58)    | 1922(1387.5-2530.78)        | 1323.3(734.37-2257.41)      | 3369.6(2037.19-5146.92)     | 4584.14(2776.25-7087.13)    | 2102.84(1264.16-3429.05)    | 1154.69(791.12-1689.22)     | 2024.87(1418.98-2847.11)    | 954.79(610.25-1395.8)       | 1592.44(895.8-2417.13)      |
|                        | Ischemic heart disease                     | 1524.69(1133.11-1925.66)    | 2119.12(1686.63-2595.35)    | 2391.79(1823.27-3112.12)    | 1469(1013.35-1978.65)       | 2036.72(1495.64-2644.13)    | 1460.62(979.94-1944.49)     | 1968.05(1389.57-2644.08)    | 1636.32(1184.83-2099.02)    | 1317.64(915.29-1719.34)     | 1786.75(1267.81-2396.47)    | 1615.9(1213.31-2075.9)      | 1691.52(1175.78-2229.61)    |
|                        | Cirrhosis and other chronic liver diseases | 1331.56(1095.91-1625.94)    | 1227.62(953.12-1582.71)     | 1693.13(1249.58-2210.45)    | 1269.74(912.09-1954.72)     | 1492.25(1132.75-1986.18)    | 1171.79(852.79-1648.64)     | 1400.83(1101.59-1750.5)     | 1282.17(959.15-1731.43)     | 1250.89(1002-1549.27)       | 1451.64(1072.82-2016.43)    | 1612.03(1281.65-1974.9)     | 1119.7(857.99-1431.6)       |
|                        | Congenital birth defects                   | 735.83(447.45-1200.08)      | 294.29(148.31-529.45)       | 583.05(363.12-963.96)       | 866.04(441.58-1475.29)      | 1023.6(524.59-1778.98)      | 614.3(370.17-995.81)        | 444.15(286.9-696.67)        | 607.49(374.86-972.76)       | 689.72(427.97-1142.24)      | 862.47(474.74-1444.55)      | 745.48(429.23-1259.86)      | 552.78(362.72-840.05)       |

|                 | Causes and conditions              | Ethiopia                  | Addis Ababa                | Afar                      | Amhara                     | B/Gumuz                    | Dire Dawa                  | Gambella                   | Harari                     | Oromia                     | Somali                     | SNNP                       | Tigray                    |
|-----------------|------------------------------------|---------------------------|----------------------------|---------------------------|----------------------------|----------------------------|----------------------------|----------------------------|----------------------------|----------------------------|----------------------------|----------------------------|---------------------------|
|                 | Diabetes mellitus                  | 706.24(606.7-813.68)      | 781.49(643.35-962.41)      | 948.96(782.94-1140.39)    | 609.84(478.05-767.44)      | 822.09(655.85-1010.38)     | 641.84(496.93-804.18)      | 758.63(610.59-934.72)      | 722.81(567.26-908.61)      | 676.1(557.15-807.1)        | 730.31(576.84-909.92)      | 858.25(705.57-1039.85)     | 727.59(589.3-884.16)      |
| YLDs both sexes | All causes                         | 10802.18(8088.52-13958.5) | 10425.76(7851.91-13353.63) | 11290.94(8406.9-14586.17) | 10674.64(7935.83-13944.33) | 10773.61(8074.54-13898.43) | 11053.29(8287.48-14208.54) | 11340.23(8536.87-14745.69) | 10943.17(8202.74-14065.21) | 10788.48(8029.18-13971.66) | 11507.02(8592.43-14929.86) | 10810.59(8100.11-14049.02) | 10640.49(8034.05-13798.2) |
|                 | Depressive disorders               | 808.7(562.26-1115.11)     | 815.88(565.46-1131.74)     | 784.23(545.69-1097.05)    | 809(558.62-1110.67)        | 796.47(554.36-1096.28)     | 803.15(559.64-1104.89)     | 802.73(557.59-1097.05)     | 803.37(557.81-1115.31)     | 815.62(566.05-1125.68)     | 775.5(538.06-1064.77)      | 807.2(560.9-1108.03)       | 805.12(560.02-1111.36)    |
|                 | Low back pain                      | 700.06(491.3-935.19)      | 636.61(446.46-858.78)      | 676.16(475.66-911.8)      | 693.74(489.41-929.96)      | 699.34(489.67-938.81)      | 650.5(456.87-872.68)       | 697.75(492.01-936.59)      | 649.95(457.22-872.7)       | 714.15(502.15-955.39)      | 680.59(478.97-918.01)      | 708.7(496.05-948.98)       | 696.2(491.44-939.63)      |
|                 | Age-related and other hearing loss | 552.7(377.77-779.89)      | 497.84(339.19-705.42)      | 570.96(390.61-803.1)      | 556.77(381.14-783.62)      | 555.14(380.23-783.62)      | 522.77(355.95-735.71)      | 534.19(363.88-753.38)      | 521.43(356.4-732.51)       | 555.32(382.38-785.18)      | 581.23(399.65-815.78)      | 548.43(375.68-766.77)      | 546.33(378.45-764.55)     |
|                 | Gynecological diseases             | 470.78(322.13-659.38)     | 481.29(328.21-675.5)       | 455.22(312.7-644.82)      | 469.82(319.18-658.88)      | 449.66(306.39-628.28)      | 470.41(321.92-661.86)      | 495.18(337.64-693.84)      | 460.07(315.67-644.58)      | 466.96(319.69-653.75)      | 465.32(316.53-653.11)      | 474.78(326.61-668.56)      | 481.39(328-672.86)        |
|                 | Blindness and vision loss          | 420.96(303.1-568.56)      | 377.4(269.11-513.85)       | 345.37(246.9-475.25)      | 398.11(287.31-538.57)      | 340.08(243.35-466.43)      | 460.07(326.94-618.74)      | 433.44(309.91-586.76)      | 480.91(345.92-648.06)      | 398.76(285.04-540.94)      | 361.65(257.49-494.55)      | 561.13(399.88-752.72)      | 373.54(265.27-508.91)     |
|                 | Dietary iron deficiency            | 396.03(261.75-579.23)     | 270.78(170.88-410)         | 677.33(445.84-1002.21)    | 279.26(178.41-425.24)      | 295.35(188.69-443.84)      | 655.76(428.15-947.89)      | 384.96(237.99-575.77)      | 498.52(309.93-740.57)      | 419.97(271.37-623.79)      | 880.51(584.83-1267.92)     | 317.82(203.95-467.85)      | 363.84(229.32-542.94)     |
|                 | Headache disorders                 | 353.16(95.74-736.24)      | 356.48(95.1-742.66)        | 361.15(100.71-741.56)     | 354.09(94.52-733.63)       | 366.38(103.59-758.09)      | 369.69(106-758.05)         | 371.41(104.49-770.89)      | 368.03(105.07-769.93)      | 353.14(94.41-734.78)       | 359.97(101.68-735.93)      | 341.02(92.98-711.45)       | 371.54(104.53-763.61)     |
|                 | Anxiety disorders                  | 331.14(230.89-451.16)     | 337.91(236.5-467.1)        | 323.11(222.71-450.05)     | 331.25(227.31-458.4)       | 327.69(228.42-452.45)      | 332.8(232.93-452.71)       | 333.21(231.46-459.7)       | 331.18(228.85-454.05)      | 331.21(231.77-452.36)      | 321.53(223.56-443.42)      | 331.6(231.11-453.17)       | 333.77(234.71-463.46)     |



|                  | Causes and conditions        | Ethiopia                    | Addis Ababa                 | Afar                        | Amhara                      | B/Gumuz                   | Dire Dawa                   | Gambella                    | Harari                     | Oromia                      | Somali                      | SNNP                       | Tigray                      |
|------------------|------------------------------|-----------------------------|-----------------------------|-----------------------------|-----------------------------|---------------------------|-----------------------------|-----------------------------|----------------------------|-----------------------------|-----------------------------|----------------------------|-----------------------------|
|                  | Neonatal disorders           | 307.52(235.31-386.04)       | 415.97(324.17-521.25)       | 343.94(261.06-430.83)       | 296.22(222.38-381.17)       | 244.58(178.2-320.99)      | 320.54(242.03-415.85)       | 332.68(253.74-416.02)       | 311.07(232.47-396.07)      | 316.12(236.97-400.83)       | 294.52(225.09-375.65)       | 278.85(207.04-362.21)      | 340.95(264.91-428.56)       |
|                  | Diabetes mellitus            | 273.67(189.12-376.26)       | 304.6(208.84-414.09)        | 329.58(226.31-454.22)       | 252.09(172.3-347.55)        | 305.7(209.15-416.91)      | 272.21(184.97-375.16)       | 286.69(197.43-390.81)       | 294.59(199.71-403.99)      | 267.03(183.63-366.12)       | 292.86(200.32-401.45)       | 301.49(206.14-415.61)      | 275.06(188.07-377.79)       |
| DALYs both sexes | All causes                   | 40990.33(36897.07-45655.97) | 35013.73(30677.01-39789.77) | 51937.77(45903.75-58657.52) | 40301.67(35840.43-45093.49) | 51020.53(44712.4-58120.7) | 38976.71(34231.93-44244.43) | 42763.26(37387.28-48345.43) | 39966.38(34978.88-45495.8) | 38782.03(34594.62-43761.05) | 49185.09(43088.93-55654.39) | 43701.09(38844.18-49315.4) | 37076.01(32498.49-42007.13) |
|                  | Neonatal disorders           | 4243.53(3407.87-5383.87)    | 1560.86(1184.97-2048.87)    | 3678.11(2912.53-4714.01)    | 4560.1(3632.64-5842.72)     | 5038.75(3911.71-6573.12)  | 3919.01(3014.94-5092.33)    | 3135.4(24092.92-4068.21)    | 3882.25(2963.08-5013.78)   | 4278.97(3442.66-5377.99)    | 4640.71(3725.92-5857.79)    | 4242.27(3354.08-5420.3)    | 3075.1(2470.85-3937.54)     |
|                  | Diarrheal diseases           | 2898.12(2035.97-3973.63)    | 883.62(519.22-1368.2)       | 3238.45(2060.54-4572.55)    | 3096.17(1847.57-4883.5)     | 3719.35(2338.4-5472.5)    | 1709.42(1023.41-2655.86)    | 1985.51(1155.12-2895.64)    | 1896.61(1151.37-2918.7)    | 2852.77(1992.59-3944.49)    | 3419.24(2318.61-4840.49)    | 3110.23(2148.2-4327.32)    | 2090.39(1346.77-3000.98)    |
|                  | Lower respiratory infections | 2415.69(2067.8-2845.72)     | 1294.6(1075.94-1572.77)     | 2837.33(2338.11-3426.68)    | 2026.77(1558.85-2552.84)    | 3583.45(2784.79-4520.95)  | 1842.26(1415.77-2373.02)    | 1947.45(1579.22-2359.05)    | 2069.93(1605.95-2631.56)   | 2445.48(2052.39-2890.3)     | 3248.92(2550.29-4023.32)    | 2709.11(2251.06-3261.28)   | 1988.83(1603.35-2405.1)     |
|                  | Tuberculosis                 | 1853.05(1539.82-2163.82)    | 1365.9(1091.7-1739.66)      | 4394.22(3500.95-5424.73)    | 1827.64(1334.64-2397.19)    | 3282.33(2672.85-3988.04)  | 1366.14(1062.32-1718.69)    | 2230.8(1742.13-2787.01)     | 1827.61(1389.91-2335.15)   | 1535.95(1263.04-1869.92)    | 3281.42(2478.07-4529.64)    | 2059.99(1690.93-2495.88)   | 1459.48(1160.08-1813.77)    |
|                  | Stroke                       | 1777.86(1411.33-2139.63)    | 2288.71(1939.56-2701.26)    | 2803.48(2234.98-3407.61)    | 1718.41(1236.2-2180.15)     | 2424.41(1880.92-3038.22)  | 1738.91(1294.21-2185.32)    | 2250.63(1655.91-2814.25)    | 2023(1549.06-2524.64)      | 1516.09(1161.15-1880.54)    | 2176.19(1619.33-2760.15)    | 1821.65(1445.18-2239.56)   | 2214.29(1709.96-2762.43)    |
|                  | HIV/AIDS                     | 1699.06(1423.54-2050.66)    | 4741.01(3524.37-6230.74)    | 3009.81(1996.96-4377.88)    | 2064.31(1522-2726.2)        | 1427.33(807.87-2364.19)   | 3639.48(2268.8-5497)        | 4982.49(3126.23-7529.25)    | 2325.68(1429.12-3748.3)    | 1242.27(852.62-1783.85)     | 2118.08(1495.38-2961.89)    | 1023.02(668.79-1488.18)    | 1723(990.03-2584.84)        |

| <b>Causes and conditions</b> | <b>Ethiopia</b>                  | <b>Addis Ababa</b>              | <b>Afar</b>                      | <b>Amhara</b>                    | <b>B/Gumuz</b>                   | <b>Dire Dawa</b>                 | <b>Gambella</b>                  | <b>Harari</b>                    | <b>Oromia</b>                   | <b>Somali</b>                    | <b>SNNP</b>                      | <b>Tigray</b>                    |
|------------------------------|----------------------------------|---------------------------------|----------------------------------|----------------------------------|----------------------------------|----------------------------------|----------------------------------|----------------------------------|---------------------------------|----------------------------------|----------------------------------|----------------------------------|
| Ischemic heart disease       | 1579.98(118<br>4.72-1974)        | 2180.6(17<br>45.92-<br>2649.5)  | 2456.51(1<br>886.94-<br>3173.22) | 1522.95(1<br>064.49-<br>2027.62) | 2097(1554<br>.05-<br>2731.21)    | 1517.08(1<br>036.11-<br>1987.75) | 2025.26(1<br>449.91-<br>2693.88) | 1692.41(1<br>239.79-<br>2153.44) | 1373.85(9<br>73.66-<br>1775.11) | 1851.79(1<br>326.42-<br>2450.78) | 1666.45(1<br>265.22-<br>2134.93) | 1746.38(1<br>234.34-<br>2282.81) |
| Cirrhosis and other CLD      | 1341.44(110<br>6.26-<br>1637.42) | 1238.39(9<br>63.18-<br>1594.02) | 1703.31(1<br>258.23-<br>2219.46) | 1279.48(9<br>22.03-<br>1965.74)  | 1502.28(1<br>142.48-<br>1994.06) | 1181(860.<br>54-<br>1659.72)     | 1410.27(1<br>109.31-<br>1758.63) | 1291.36(9<br>69.83-<br>1740.35)  | 1260.5(10<br>15.22-<br>1559.15) | 1461.72(1<br>084.96-<br>2028.88) | 1622.55(1<br>292.62-<br>1985.18) | 1129.05(8<br>66.49-<br>1440.11)  |
| Diabetes mellitus            | 979.91(849.7<br>9-1115.68)       | 1086.09(9<br>16.96-<br>1276.16) | 1278.55(1<br>076.67-<br>1489.03) | 861.93(70<br>2.22-<br>1040.72)   | 1127.8(93<br>2.74-<br>1340.89)   | 914.06(75<br>0.84-<br>1091.97)   | 1045.32(8<br>70.92-<br>1233.25)  | 1017.41(8<br>28.7-<br>1218.99)   | 943.12(80<br>4.51-<br>1093.68)  | 1023.16(8<br>45.73-<br>1228.82)  | 1159.74(9<br>74.45-<br>1365.04)  | 1002.65(8<br>25.12-<br>1181.7)   |

Table S6. Age-standardised death, YLL, YLD, and DALY rates for 100 000 population, both sexes for the leading 11<sup>th</sup>-20<sup>th</sup> causes in Ethiopia's regions and chartered cities, 2019

|                  | Conditions and causes                   | Ethiopia           | Addis Ababa        | Afar               | Amhara             | B/Gumuz            | Dire Dawa          | Gambella           | Harari             | Oromia             | Somali             | SNNP               | Tigray             |
|------------------|-----------------------------------------|--------------------|--------------------|--------------------|--------------------|--------------------|--------------------|--------------------|--------------------|--------------------|--------------------|--------------------|--------------------|
| Death both sexes | Chronic obstructive pulmonary disease   | 28.32(22.6-33.35)  | 22.85(16.88-28.26) | 32.05(21.92-45.83) | 28.46(22.17-38.11) | 27.64(17.93-40.11) | 20.12(14.43-26.6)  | 26.21(19.13-34)    | 23.16(16.54-29.01) | 26.99(20.6-32.21)  | 29.44(18.85-50.63) | 31.21(24.15-37.86) | 37.98(30.89-45.87) |
|                  | Alzheimer's disease and other dementias | 27.82(6.68-75.12)  | 27.13(6.6-74.56)   | 23.6(5.43-65.31)   | 26.58(6.62-72.44)  | 24.48(5.78-67.95)  | 26.36(6.36-70.85)  | 25.2(6.01-68.84)   | 26.77(6.46-73.23)  | 28.93(6.93-77.37)  | 24.13(5.66-65.44)  | 28.8(6.99-77.05)   | 26.8(21.83-32.75)  |
|                  | Chronic kidney disease                  | 26.17(22.48-30.08) | 26.99(22.3-32.27)  | 31.6(26.11-38.81)  | 22.6(17.82-27.8)   | 28(22.56-34.65)    | 25.79(21.13-30.78) | 27.24(22.08-32.77) | 28.07(23.25-33.34) | 26.4(21.43-31.3)   | 26.14(20.38-33.81) | 30.8(25.61-36.63)  | 30.54(23.71-39.76) |
|                  | Road injuries                           | 14.51(12.16-17.36) | 12.86(9.89-16.03)  | 19.37(15.31-24.19) | 12.94(10.13-16.31) | 17.11(13.84-21.17) | 14.06(9.05-22)     | 15.42(12.09-19.85) | 14.57(10.15-23.99) | 13.87(11.31-17.1)  | 16.37(12.71-20.75) | 17.79(14.31-22.52) | 10.35(7.63-13.6)   |
|                  | Meningitis                              | 14.14(12-16.55)    | 10.15(8.25-12.51)  | 23.78(19.04-29.34) | 12.88(9.83-16.55)  | 20.01(15.89-24.49) | 10.35(8.16-12.92)  | 13.09(10.51-16.1)  | 12.9(10.12-16.16)  | 13.11(10.81-15.78) | 20.68(16.1-26.3)   | 16.05(13.33-19.23) | 8.95(5.82-14.27)   |
|                  | Protein-energy malnutrition             | 12.9(9.77-16.7)    | 11.21(9.2-13.43)   | 35.56(27.54-45.51) | 5.93(2.54-11.14)   | 27.52(21.07-34.18) | 12.57(8.93-18.56)  | 12.9(8.84-17.04)   | 12.23(8.47-18.06)  | 14.2(10.71-17.95)  | 33.34(23.07-46.02) | 13.89(10.2-18.57)  | 8.09(5.12-12.16)   |
|                  | Self-harm                               | 10.13(8.21-12.9)   | 9.12(6.95-12.18)   | 13.45(10.53-17.6)  | 8.83(6.37-12.88)   | 11.14(8.69-14.44)  | 7.82(5.79-10.93)   | 10.39(7.56-14.69)  | 8.75(6.49-12.25)   | 9.48(7.42-12.49)   | 10.77(8.07-14.8)   | 13.89(11.11-17.56) | 11.14(8.18-14.88)  |
|                  | Breast cancer                           | 9.71(7.96-11.64)   | 15.45(11.29-20.74) | 10.59(7.83-14.02)  | 7.67(5.28-11.31)   | 11.29(8.44-14.91)  | 10.76(8.02-14.88)  | 8.81(6.5-12.45)    | 11.89(8.81-15.64)  | 9.86(7.89-11.85)   | 6.41(4.24-9.72)    | 11.36(9.05-13.65)  | 11.38(8.58-13.97)  |
|                  | Interpersonal violence                  | 9.68(7.94-11.89)   | 7.45(5.53-9.96)    | 14.17(10.04-20.08) | 9.61(6.93-12.96)   | 11.74(8.89-15.43)  | 8.45(6.12-11.46)   | 11.23(8.23-15.69)  | 9.15(6.57-12.5)    | 8.15(6.43-10.38)   | 12.33(8.6-17.16)   | 11.87(9.05-15.09)  | 8.73(5.92-13.9)    |

|                |                                       |                       |                       |                        |                       |                         |                         |                         |                       |                        |                        |                        |                        |
|----------------|---------------------------------------|-----------------------|-----------------------|------------------------|-----------------------|-------------------------|-------------------------|-------------------------|-----------------------|------------------------|------------------------|------------------------|------------------------|
|                | Falls                                 | 9.60(8.09-11.29)      | 8.24(6.8-10.08)       | 9.36(7.14-11.83)       | 9.4(7.26-12.24)       | 8.71(6.64-11.45)        | 8.58(6.79-10.78)        | 9.21(6.89-11.8)         | 9.17(7.39-11.16)      | 9.23(7.53-11.12)       | 8.48(6.52-11)          | 11.36(9.12-13.72)      | 6.82(0.88-22.47)       |
| YLL both sexes | Malaria                               | 683(134.17-1805.31)   | 80.82(4.95-322.86)    | 373.87(31.02-1173.15)  | 642.99(81.19-1704.74) | 1326.48(162.19-3879.9)  | 1569.61(176.86-3767.72) | 1145.93(255.32-2841.13) | 1389.51(208.1-3554.6) | 654.69(117.28-1814.73) | 634.24(78.43-1750.82)  | 861.55(194.07-2475.56) | 499.02(67.98-1567.23)  |
|                | Meningitis                            | 610.64(507.11-731.76) | 356.77(278.5-453.27)  | 965.31(758.53-1204.6)  | 536.11(404.85-691.23) | 975.27(750.02-1240.64)  | 423.99(311.33-565.46)   | 481.7(370.82-603.58)    | 527.38(389-694.81)    | 563.94(448.04-715.52)  | 959.33(743.79-1226.97) | 700.02(558.84-860.09)  | 421.36(323.54-526.07)  |
|                | Hypertensive heart disease            | 537.33(299.59-899.12) | 578.68(280.46-923.66) | 730.6(406.49-1138.62)  | 516.1(273.57-892.85)  | 683.18(369.07-1100.28)  | 513.21(260.79-902.74)   | 566.79(312.11-1012.36)  | 590.42(300.06-993.86) | 494.93(265.37-867.22)  | 573.97(304.92-1032.18) | 582.15(345.94-918.28)  | 599.56(321.39-1034.76) |
|                | Chronic kidney disease                | 522.69(454.91-600.02) | 531.12(436.12-648.14) | 686.48(561.31-835.23)  | 446.59(351.84-556.86) | 620.57(500.31-770.69)   | 490.61(397.47-602.27)   | 531.62(422.7-654.89)    | 550.98(448.82-669.85) | 511.23(426.59-603.31)  | 545.93(425.15-696.46)  | 634.24(531.74-754.82)  | 515.25(417.04-637)     |
|                | Road injuries                         | 510.67(422.65-615.89) | 431.32(325.37-556.51) | 684.58(516.43-873.82)  | 459.7(359.92-585.84)  | 667.9(537.38-822.97)    | 474.43(303.11-745.92)   | 519.61(393.92-685.82)   | 507.52(342.8-840.62)  | 471.67(380.87-589.71)  | 600.39(463.71-775.64)  | 633.39(499.45-830.87)  | 434.66(333.41-567.46)  |
|                | Chronic obstructive pulmonary disease | 484.13(385.65-573.47) | 392.68(290.4-489.06)  | 554.22(377-806.65)     | 486.77(375.22-671.88) | 480.06(309.41-728.93)   | 291.6(93.2-668.05)      | 454.32(327.31-593.83)   | 397.06(274.17-504.33) | 451.63(338.94-543.17)  | 501.8(322.05-880.26)   | 550.34(423.27-671.85)  | 518.63(396.85-679.95)  |
|                | Protein-energy malnutrition           | 446.03(336.29-605.03) | 228.99(186.79-280.27) | 923.33(690.56-1193.61) | 233.46(94.69-473.93)  | 1044.34(736.16-1426.44) | 339.45(211.67-544.92)   | 289.91(194.23-416.24)   | 323.28(201.45-527.07) | 477.67(335.81-649.84)  | 1133.4(724.21-1669.51) | 436.11(304.55-641.83)  | 258.09(182.33-359.42)  |
|                | Maternal disorders                    | 439.96(318.87-599.92) | 151.91(89.11-257.77)  | 1233.67(784.3-1875.55) | 284.02(174.82-426.28) | 1094.4(729.35-1510)     | 246.24(158.28-411.69)   | 160.01(98.58-236.7)     | 279.98(169.34-481.56) | 435.84(286.62-644.6)   | 876.6(554.04-1265.93)  | 480.66(309.6-703.08)   | 430.55(269.75-645.46)  |
|                | Interpersonal violence                | 408.09(332.52-504.84) | 315.89(226.89-434.94) | 599.25(409.86-876.16)  | 402.14(290.01-550.62) | 512.11(387.88-676.98)   | 353.52(247.69-490.2)    | 468.18(329.91-668.58)   | 386.75(271.26-541.91) | 340.47(263.93-445.33)  | 524.71(369.67-725.35)  | 500.62(380.86-643.56)  | 402.9(296.58-535.61)   |
|                | Whooping cough                        | 399.45(41.75-1131.46) | 69.49(2.14-279.08)    | 605.69(26.91-2154.91)  | 441.06(18.96-1702.75) | 453.37(12.5-2061.47)    | 207.36(8.53-925.82)     | 282.13(11.17-1086.73)   | 384.82(10.98-1622.83) | 377.68(25.31-1198.75)  | 643.63(27.19-2382.19)  | 385.42(15.38-1556.24)  | 174.25(6.72-710.16)    |

|                 |                                                   |                       |                       |                       |                       |                       |                       |                       |                       |                       |                       |                       |                       |
|-----------------|---------------------------------------------------|-----------------------|-----------------------|-----------------------|-----------------------|-----------------------|-----------------------|-----------------------|-----------------------|-----------------------|-----------------------|-----------------------|-----------------------|
| YLDs both sexes | Alcohol use disorders                             | 258.35(173.38-365.67) | 263.07(177.42-374.29) | 278.53(184.98-390.16) | 256.58(169.65-360.88) | 265.89(177.63-373.74) | 264.27(177.46-375.05) | 257.1(173.01-368.25)  | 275.12(185.67-388.14) | 255.57(170.31-360.68) | 273.52(183.9-384.42)  | 259.27(174.9-370.16)  | 252.95(169.28-357.57) |
|                 | Oral disorders                                    | 246.16(129.76-416.59) | 248.4(129.14-431.29)  | 243.95(129.65-414.65) | 246.49(131.25-418.36) | 245.45(131.1-415.58)  | 247.01(129.06-422.72) | 246.23(129.35-415.76) | 247.24(129.24-425.4)  | 246.09(129.79-416.38) | 244.45(131.01-411.42) | 245.65(130.32-414.37) | 246.45(129.85-416.4)  |
|                 | Endocrine, metabolic, blood, and immune disorders | 228.77(152.94-320.67) | 255.22(169.35-359.71) | 236.44(159.15-329.32) | 221.47(148.14-311.69) | 217.19(145.93-307.37) | 263.9(176.42-371.57)  | 233.31(155.5-327.42)  | 251.24(168.69-353.06) | 228.08(152.15-323.81) | 248.62(168.22-344.39) | 222.57(148.65-313.72) | 228.82(154.19-319.6)  |
|                 | Diarrheal diseases                                | 218.7(150.52-299.77)  | 176.68(122.81-245.54) | 209.71(145.84-292.82) | 223.64(156.27-309.68) | 251.3(172.87-345.88)  | 182.14(126.39-251.31) | 219.81(151.88-302.6)  | 199.83(139.07-274.6)  | 216.11(148.87-299.91) | 230.19(157.37-314.9)  | 227.01(156.14-313.95) | 204.56(141.9-282.09)  |
|                 | Conflict and war                                  | 212.31(115.82-430.6)  | 213.27(122.93-394.7)  | 168.13(89.47-342.39)  | 263.32(155.72-448.99) | 181.51(97.23-361.93)  | 190.12(103.33-358.93) | 422.18(256.94-661.78) | 378.76(227.87-610.05) | 175.98(95.44-337.52)  | 226.3(130.22-381.26)  | 161.42(54.73-585.96)  | 341.03(208.08-546.08) |
|                 | Road injuries                                     | 201.72(147.96-265.31) | 193.4(140.27-257.54)  | 211.68(155.19-277.83) | 188.64(138.28-248.04) | 214.62(157.15-282.01) | 207.87(151.85-273.7)  | 180.14(131.89-235.8)  | 209.83(153.68-275.71) | 201.76(147.54-265.83) | 229.15(167.96-300.98) | 216.33(157.43-284.18) | 190.96(139.94-251.95) |
|                 | Osteoarthritis                                    | 194.89(99.24-382.4)   | 210.16(106.58-416.52) | 189.44(96.53-370.53)  | 194.58(98.98-382.12)  | 192.66(97.08-377.22)  | 202.34(102.98-395.07) | 197.04(99.85-385.88)  | 202.17(103.04-395.2)  | 194.23(98.83-379.98)  | 188.37(95.25-371.36)  | 193.57(98.38-381.83)  | 196.57(98.84-384.49)  |
|                 | Other musculoskeletal disorders                   | 192.11(103.34-287.74) | 264.94(152.63-390.04) | 183.21(101.39-273.26) | 178.91(93.01-272.56)  | 196.05(113.42-293.29) | 227.49(130.48-336.11) | 177.19(85.93-281.91)  | 192.39(94.95-303.75)  | 198.88(112.13-297.37) | 151.25(79.39-236.41)  | 195.61(98.79-291.5)   | 174.06(87.62-275.68)  |
|                 | Schistosomiasis                                   | 165.23(81.25-310.87)  | 0(0-0)                | 51(27.64-86.75)       | 248.86(119.54-474.65) | 22.01(10.4-44.17)     | 99.65(50.5-184.12)    | 22.02(11.0-42.06)     | 0(0-0)                | 151.08(74.53-278.07)  | 29.22(17.15-47.18)    | 192.05(93.89-366.78)  | 164.12(80.2-304.06)   |
|                 | Chronic obstructive pulmonary disease             | 144.95(119.38-168.06) | 178.64(147.19-206.83) | 157.24(130.47-181.61) | 137.75(113.32-160.94) | 158.74(130.56-184.49) | 172.51(143.63-200.13) | 165.25(136.23-192.33) | 190.43(157.31-219.35) | 137.22(112.63-161.52) | 147.17(120.25-171.6)  | 155.83(126.70-182.61) | 149.66(123.63-173.44) |

|                  |                                       |                        |                        |                         |                        |                         |                         |                         |                        |                        |                        |                        |                        |
|------------------|---------------------------------------|------------------------|------------------------|-------------------------|------------------------|-------------------------|-------------------------|-------------------------|------------------------|------------------------|------------------------|------------------------|------------------------|
| DALYs both sexes | Depressive disorders                  | 808.70(562.26-1115.11) | 815.88(565.46-1131.74) | 784.23(545.69-1097.05)  | 809.00(558.62-1110.67) | 796.47(554.36-1096.28)  | 803.15(559.64-1104.89)  | 802.73(557.59-1097.05)  | 803.37(557.81-1115.31) | 815.62(566.05-1125.67) | 775.5(538.06-1064.77)  | 807.20(560.9-1108.03)  | 805.12(560.02-1111.36) |
|                  | Malaria                               | 738.85(186.18-1870.55) | 96.43(20.36-337.73)    | 443.42(95.82-1235.14)   | 679.26(110.86-1741.08) | 1420.35(246.31-3969.51) | 1637.04(251.95-3843.53) | 1273.04(362.73-2983.18) | 1467.02(296-3605.31)   | 716.99(172.57-1862.25) | 727.08(168.74-1831.42) | 919.45(247.26-2582.9)  | 542.42(109.00-1620.8)  |
|                  | Road injuries                         | 712.39(604.39-836.71)  | 624.72(495.27-759.17)  | 896.26(724.56-1103.52)  | 648.33(526.86-793.24)  | 882.53(738.36-1042.26)  | 682.3(495.57-953.58)    | 699.75(559.02-879.69)   | 717.35(539.13-1052.66) | 673.42(565.26-812.11)  | 829.54(677.26-1006.22) | 849.72(696.35-1044.57) | 625.61(500.91-769.01)  |
|                  | Low back pain                         | 700.06(491.31-935.19)  | 636.61(446.46-858.78)  | 676.16(475.66-911.8)    | 693.74(489.41-929.96)  | 699.34(489.67-938.81)   | 650.5(456.87-872.68)    | 697.75(492.01-936.58)   | 649.95(457.22-872.7)   | 714.15(502.15-955.39)  | 680.59(478.97-918.01)  | 708.7(496.05-948.98)   | 696.2(491.44-939.63)   |
|                  | Meningitis                            | 640.2(534.77-760.73)   | 372.36(294.04-471.01)  | 1002.98(799.35-1243.99) | 563.2(432.4-719.2)     | 1004.4(777.04-1269.52)  | 444.76(330.82-585.71)   | 507.81(400.15-630.14)   | 550.66(413.14-718.66)  | 594.21(478.28-742.92)  | 999.09(779.7-1267.92)  | 732.12(592.47-890.9)   | 445.12(346.12-549.25)  |
|                  | Chronic obstructive pulmonary disease | 629.09(524.55-724.2)   | 571.32(462.65-672.01)  | 711.46(533.63-970.8)    | 624.52(507.73-803.78)  | 638.81(464.86-885.93)   | 503.66(402.01-616.94)   | 619.57(486.23-762.74)   | 587.49(463.2-701.6)    | 588.86(477.89-682.22)  | 648.97(468.27-1029.33) | 706.17(574.89-837.08)  | 668.29(540.5-834.52)   |
|                  | Chronic kidney disease                | 592.99(523.05-674.12)  | 607.25(508.77-727.05)  | 754.46(435.85-1165.64)  | 512.67(417.44-625.64)  | 694.84(569.71-847.82)   | 562.57(466.24-680.14)   | 598.98(489.72-726.77)   | 623.11(516.29-748.69)  | 582.04(494.14-676.87)  | 613.81(493.16-768.75)  | 706.71(604.57-829.49)  | 585.83(484.93-706.86)  |
|                  | Hypertensive heart disease            | 559.74(322.52-920.44)  | 602.37(304.22-951.28)  | 754.46(435.85-1165.64)  | 538.25(295.71-913.49)  | 706.46(390.76-1130.4)   | 535.48(281.93-927.18)   | 589.37(334.23-1030.84)  | 612.22(320.23-1017.6)  | 517.73(288.16-896.15)  | 598.59(331.88-1062.61) | 603.09(364.65-944.18)  | 621.83(348.98-1054.59) |
|                  | Age-related and other hearing loss    | 552.7(377.77-779.89)   | 497.84(339.19-705.42)  | 570.96(390.61-803.1)    | 556.77(381.14-783.62)  | 555.14(380.23-783.61)   | 522.77(355.95-735.71)   | 534.19(363.88-753.38)   | 521.43(356.4-732.51)   | 555.32(382.38-785.18)  | 581.23(399.65-815.78)  | 548.43(375.68-766.77)  | 546.33(378.45-764.55)  |
|                  | Maternal disorders                    | 496.94(378.56-657.72)  | 166.92(103.82-272.88)  | 1297.95(840.11-1942.44) | 338.52(232.42-485.61)  | 1159.42(798.72-1581.93) | 295.72(205.98-462.42)   | 200.08(137.04-273.75)   | 327.54(212.87-523.65)  | 496.46(345.68-705.16)  | 971.55(648.99-1344.7)  | 537.97(367.29-760.3)   | 470.46(307.68-685.8)   |

Table S7. SDI and LE for both sexes by age-standardised YLL rates for 5 leading causes in Ethiopia's regions and chartered cities, both sexes, 2019

| Location    | SDI  | Level  | LE, both sexes | Level  | Neonatal disorders       | Diarrheal diseases       | Lower respiratory infections | Tuberculosis             | Stroke                   | Level of YLL |
|-------------|------|--------|----------------|--------|--------------------------|--------------------------|------------------------------|--------------------------|--------------------------|--------------|
| Addis Ababa | 0.64 | High   | 71.6           | High   | 1144.89(786.19-1613.71)  | 706.94(346.09-1160)      | 1285.69(1065.07-1561.83)     | 1257.74(987.65-1637.78)  | 2076.73(1734.67-2511.62) | Low          |
| Dire Dawa   | 0.50 | High   | 72.4           | High   | 3598.47(2689.6-4760.63)  | 1527.28(863.89-2479.98)  | 1832.81(1407.35-2363.18)     | 1265.73(961.97-1615.11)  | 1572.81(1132.77-2021.77) | Low          |
| Harari      | 0.49 | High   | 70.9           | High   | 3571.17(2669.98-4709.61) | 1696.78(949.97-2706.74)  | 2060.45(1595.62-2623.15)     | 1708.9(1268.87-2211.91)  | 1844.51(1379.32-2326.34) | Low          |
| Gambella    | 0.41 | High   | 69.5           | Low    | 2802.72(2094.7-3707.8)   | 1765.71(941.39-2671.89)  | 1937.46(1567.7-2344.65)      | 2108.48(1620.78-2668.38) | 2089.66(1505.93-2660.73) | Moderate     |
| Tigray      | 0.36 | Middle | 71.1           | High   | 2734.15(2110.52-3602.85) | 1885.83(1160.09-2787.08) | 1977.15(1593.94-2395.05)     | 1353.68(1052.73-1707.25) | 2065.02(1571.61-2618.6)  | Moderate     |
| SNNP        | 0.33 | Middle | 67.5           | Middle | 3963.41(3074.49-5162.24) | 2883.22(1933.89-4093.83) | 2698.2(2243.52-3250.28)      | 1932.74(1568.38-2350.92) | 1694.69(1329.04-2112.14) | Moderate     |
| B-Gumuz     | 0.32 | Middle | 65             | Low    | 4794.17(3682.23-6308.66) | 3468.05(2075.83-5236.29) | 3571.17(2772.41-4510.79)     | 3122.54(2515.9-3818.3)   | 2265.59(1735.78-2873.04) | Moderate     |
| Oromia      | 0.32 | Middle | 70.8           | High   | 3962.85(3151.45-5047.45) | 2636.66(1799.45-3752.16) | 2433.84(2042.25-2879.55)     | 1424.64(1145.31-1764.27) | 1382.54(1033.51-1753.97) | Moderate     |
| Amhara      | 0.31 | Middle | 70.2           | High   | 4263.88(3325.45-5535.56) | 2872.53(1619.57-4669.36) | 2016.49(1551.49-2541.83)     | 1694(1206.7-2252.3)      | 1585.87(1113.95-2048.27) | Moderate     |
| Afar        | 0.26 | Low    | 62.7           | Low    | 3334.17(2575.7-4376.74)  | 3028.74(1858.68-4359.95) | 2824.7(2323.08-3414.07)      | 4224.43(3303.11-5286.23) | 2643.28(2063.5-3255.2)   | High         |
| Somali      | 0.19 | Low    | 65.1           | Low    | 4346.19(3427.41-5558.73) | 3189.06(2085.43-4620.42) | 3236.48(2537.45-4006.03)     | 3114.68(2316.65-4344.2)  | 2029.76(1472.25-2610.22) | High         |

Table S8. Age-standardised death rates per 100 000 population for all causes combined and leading 20 causes in Ethiopia's regions and chartered cities, women and men, 2019

|               | Causes of death                         | Ethiopia                  | Addis Ababa              | Afar                        | Amhara                     | B/Gumuz                      | Dire Dawa                 | Gambella                 | Harari                    | Oromia                    | Somali                  | SNNP                       | Tigray                    |
|---------------|-----------------------------------------|---------------------------|--------------------------|-----------------------------|----------------------------|------------------------------|---------------------------|--------------------------|---------------------------|---------------------------|-------------------------|----------------------------|---------------------------|
| Female deaths | All causes                              | 881.70<br>(802.03-952.61) | 846.31<br>(711.5-1023.2) | 1567.50<br>(1326.77-1849.8) | 783.278<br>(708.57-891.13) | 1345.61<br>(1106.78-1601.98) | 822.79<br>(720.96-961.82) | 779.4<br>(692.41-875.05) | 851.94<br>(709.24-999.46) | 875.11<br>(769.61-965.82) | 1127.46(963.58-1339.99) | 935.89<br>(818.59-1065.21) | 896.02<br>(763.35-1051.7) |
|               | Stroke                                  | 87.74<br>(67.45-107.29)   | 107.73<br>(83.57-136.9)  | 175.02(130.7-227.98)        | 78.8(51.92-103.05)         | 148.31(108.5-193.38)         | 84.7(59.15-113.29)        | 77.27(47.25-106.31)      | 95.93(70.49-123.4)        | 80.88(58.78-102.48)       | 114.34(83.86-151.05)    | 86.38(65.46-108.22)        | 119.47(85.52-153.77)      |
|               | Ischemic heart disease                  | 79.84<br>(56.94-99.74)    | 100.46<br>(76-130.69)    | 155.16(113.87-209.83)       | 68.76(45.2-93.56)          | 133.97(97.87-175.16)         | 79.4(50.82-108.69)        | 71.66(42.49-97.74)       | 86.42(60.58-112.71)       | 79.12(53.48-103.93)       | 100.89(72.17-136.02)    | 81.17(58.31-104.6)         | 92.34(61.12-124)          |
|               | Lower respiratory infections            | 71.82<br>(60.22-82.99)    | 47.1<br>(35.53-62.56)    | 112.45(87.3-142.38)         | 57.96(44.15-73.73)         | 109.25(82.62-138.82)         | 56.25(42.54-71.38)        | 47.99(34.65-60.18)       | 63.04(49.07-79.93)        | 77.35(62.08-92.42)        | 88.33(69.03-111.44)     | 79.26(63.54-95.26)         | 73.3(56-93.5)             |
|               | Diarrheal diseases                      | 63.48<br>(30.23-128.99)   | 16.4<br>(4.78-53.55)     | 112.73(45.68-218.65)        | 63.2(29.61-132.41)         | 99.13(40.42-214.31)          | 40.34(17.39-86.3)         | 46.97(20.53-94.41)       | 42.6(22.61-59.84)         | 64.94(29.28-137.66)       | 86.06(37.25-171.15)     | 72.33(33.43-145.29)        | 47.24(19.3-109.85)        |
|               | Tuberculosis                            | 44.93<br>(35.5-59.38)     | 30.72(22.11-42.63)       | 149.54(109.24-202.94)       | 39.73(25.04-64.16)         | 108.2(77.97-142.03)          | 32.66(20.12-45.32)        | 34.07(22.91-45.81)       | 42.13(17.86-90.96)        | 41.86(31.69-60.24)        | 94.1(63.16-169.61)      | 47.44(35.92-66.11)         | 37.07(27.09-55.42)        |
|               | HIV/AIDS                                | 41.66<br>(34.41-49.73)    | 127.63(92.71-167.76)     | 73.8(50.07-104.95)          | 45.83(30.41-62.28)         | 30.74(16.62-54.07)           | 77.18(45.62-122.27)       | 120.78(68.63-185.47)     | 40.33(17.86-74.54)        | 30.97(21.62-43.65)        | 52.24(37.41-71.58)      | 25.05(17.06-35.52)         | 41.93(23.4-61.82)         |
|               | Hypertensive heart disease              | 38.3<br>(21.34-60.49)     | 37.56(16.72-63.7)        | 68.26(34.28-113.82)         | 34.8(17.86-62.71)          | 57.5(30.06-85.12)            | 36.43(16.41-68.41)        | 33.71(16.45-77.48)       | 39.09(25.77-58.35)        | 37.96(20.27-61.9)         | 45.91(24.26-72.64)      | 40.4(21.6-58.63)           | 43.02(23.09-67.4)         |
|               | Cirrhosis and other CLD                 | 36.08<br>(28.24-44.05)    | 31.99(23.7-43.66)        | 59(42.49-78.73)             | 31.15(19.77-46.22)         | 49.54(33.21-67.55)           | 33.22(22.46-49.31)        | 28.27(17.58-43.28)       | 34.79(24.96-47.6)         | 37.23(28.43-46.42)        | 38.96(27.9-52.42)       | 40.58(30.9-51.04)          | 36.28(26.48-47.79)        |
|               | Neonatal disorders                      | 35.44<br>(28.32-44.58)    | 9.52(6.41-13.33)         | 30.15(23.61-39.05)          | 38.23(30.04-48.62)         | 43.2(33.67-55.62)            | 32.12(24.23-41.71)        | 24.86(18.82-32.64)       | 31.84(23.55-41.52)        | 35.89(28.68-45.2)         | 39.1(31.28-49.02)       | 35.54(27.99-45.59)         | 24.54(19.21-31.48)        |
|               | Alzheimer's disease and other dementias | 30.08(7.38-79.52)         | 29.17(7.15-77.02)        | 27.14(6.2-76.24)            | 28.24(6.99-75.65)          | 28.73(6.74-80.04)            | 27.75(6.74-75.12)         | 25.59(6.16-69.16)        | 28.75(21.12-36.99)        | 31.66(7.67-82.15)         | 27.44(6.58-74.37)       | 30.8(7.14-81.38)           | 31.16(7.47-83.36)         |
|               | Diabetes mellitus                       | 28.84(24.01-33.26)        | 29.16(22.61-38.23)       | 49.92(38.64-63.37)          | 22.93(17.13-29.26)         | 43.64(32.55-57.1)            | 26.05(18.91-33.65)        | 20.25(13.83-25.7)        | 28.05(6.54-77.74)         | 30.47(24-37.3)            | 32.77(24.63-43.32)      | 32.33(25.66-39.52)         | 31.74(24.3-40.78)         |
|               | Chronic kidney disease                  | 21.51(18.03-25.19)        | 23.2(17.26-30.57)        | 33.61(25.76-44.61)          | 16.13(12.23-21.79)         | 29.82(21.8-40.39)            | 21.26(15.93-27.31)        | 15.6(12.32-20.89)        | 23.21(17.57-29.34)        | 23.69(18.34-28.61)        | 21.68(16.07-30.04)      | 24.81(19.81-30.31)         | 22.19(16.75-29.5)         |
|               | Chronic obstructive pulmonary disease   | 19.1(13.29-24.52)         | 15.57(5.22-21.77)        | 23.35(12.6-46.68)           | 18.51(12.52-28.6)          | 21.51(10.98-42.95)           | 11.9(7.01-18.45)          | 10.02(6.32-17.71)        | 14.91(8.82-20.45)         | 19.07(13.18-24.74)        | 18.13(9.63-33.54)       | 19.96(13.35-26.95)         | 21.74(13.12-29.96)        |
|               | Breast cancer                           | 17.36(14.3-20.5)          | 26.65(18.78-37.71)       | 25.08(18.34-34.29)          | 12.91(8.57-19.48)          | 23.03(16.71-31.31)           | 18.37(13.46-26.05)        | 14.18(9.86-20.85)        | 19.88(14.21-27.05)        | 18.03(14.14-21.93)        | 13.7(8.74-21.98)        | 20.21(15.82-24.82)         | 17.77(12.77-23.85)        |



|             | Causes of death                       | Ethiopia                | Addis Ababa             | Afar                    | Amhara                  | B/Gumuz                 | Dire Dawa               | Gambella                 | Harari                 | Oromia                 | Somali                  | SNNP                     | Tigray                 |
|-------------|---------------------------------------|-------------------------|-------------------------|-------------------------|-------------------------|-------------------------|-------------------------|--------------------------|------------------------|------------------------|-------------------------|--------------------------|------------------------|
|             | Cervical Cancer                       | 16.82(11.73-27.12)      | 15.09(10.28-21.48)      | 34.01(21.55-48.43)      | 13.18(8.33-24.4)        | 27.78(17.79-38.67)      | 13.37(8.9-21.67)        | 11.22(7.6-20.15)         | 14.91(8.82-20.45)      | 17.41(11.21-30.29)     | 21.1(13.39-34.52)       | 18.96(12.22-29.51)       | 17.51(11.38-27.92)     |
|             | Maternal disorders                    | 16.16(11.8-21.87)       | 5.18(3.03-8.8)          | 46.85(29.72-70.75)      | 10.47(6.52-15.73)       | 41.22(27.33-58.26)      | 9.19(5.86-15.15)        | 5.66(3.48-8.39)          | 10.78(6.53-18.29)      | 16.17(10.62-23.96)     | 33.47(21.19-48.46)      | 17.26(11.19-25.15)       | 15.57(9.84-23.47)      |
|             | Protein-energy malnutrition           | 12.95(8.71-18.15)       | 9.78(7.31-12.97)        | 39.48(26.06-57.35)      | 7.03(1.75-15.78)        | 30.56(22.38-40.3)       | 11.87(7.5-17.15)        | 9.44(4.12-14.72)         | 12.08(7.15-18.48)      | 14.53(9.56-20.5)       | 40(20.85-64.67)         | 13.27(8.45-19.75)        | 11.03(7.11-16.67)      |
|             | Meningitis                            | 12.79(10.45-15.71)      | 8.95(6.55-12.23)        | 29.97(22.17-39.65)      | 10.86(7.77-15.73)       | 23.43(16.61-30.74)      | 9.01(6.64-12.25)        | 8.07(6.02-11.48)         | 11.2(8.02-15.54)       | 12.4(9.43-15.66)       | 21.58(15.43-30.51)      | 13.92(10.95-17.37)       | 10.59(7.52-14.08)      |
|             | Asthma                                | 8.81(4.22-14.89)        | 5.43(2.46-9)            | 17.99(10.24-31.2)       | 8.75(3.27-20.33)        | 14.67(8.83-22.76)       | 6.33(3.89-10.99)        | 6.63(3.26-15.88)         | 6.99(3.8-11.22)        | 8.14(3.68-12.61)       | 12.79(6.98-23.96)       | 9.5(4.51-14.75)          | 9.22(4.36-15.48)       |
|             | Malaria                               | 8.58(1.69-22.61)        | 1.08(0.07-4.62)         | 5.78(0.46-18.79)        | 7.69(0.98-21.3)         | 17.57(2.12-52.78)       | 20.8(2.25-52.04)        | 15.04(3.3-23.23)         | 20.04(2.65-54.09)      | 8.4(1.47-23.56)        | 8.42(1.02-23.5)         | 10.81(2.34-31.16)        | 6.41(0.85-20.58)       |
| Male deaths | All causes                            | 1101.46(963.36-1246.05) | 1059.10(828.17-1256.09) | 1249.80(1015.7-1517.27) | 1135.70(943.66-1355.44) | 1119.87(899.63-1381.09) | 1048.83(879.18-1283.72) | 1436.37(1204.81-1721.87) | 1134.65(917.31-1377.4) | 984.89(823.06-1159.58) | 1202.89(958.93-1461.27) | 1245.90(1031.54-1461.81) | 1073.23(889.9-1259.76) |
|             | Lower respiratory infections          | 100.69(84.1-121.43)     | 73.63(55.07-98.34)      | 98.77(76.97-127.31)     | 92.51(70.55-122.17)     | 95.84(74.66-124.17)     | 85.42(67.38-109.56)     | 120.22(95.68-149.57)     | 95.76(72.59-123.47)    | 100.36(79.9-123.59)    | 101.76(77.26-130.74)    | 118.82(94.31-146.36)     | 96.96(74.83-122.33)    |
|             | Stroke                                | 92.67(66.85-119.93)     | 126.31(91.11-159.68)    | 111.33(77.7-148.51)     | 100.51(67.2-138.47)     | 91.14(58.28-128.96)     | 96.31(65.79-132.78)     | 151.61(108.67-198.99)    | 110.64(76.5-150.67)    | 74.55(49.93-102.39)    | 103.17(68.26-144.18)    | 95.11(66.94-128.47)      | 115.85(79.9-154.57)    |
|             | Diarrheal diseases                    | 89.34(41.45-128.01)     | 33.49(7.26-60.01)       | 97.4(44.17-157.09)      | 106.29(38.7-181.12)     | 110.43(47.8-192.69)     | 59.29(23.45-92.79)      | 88.53(30.51-144.95)      | 65.96(24.09-114.39)    | 77.84(38.48-122.86)    | 106.66(51.24-188.67)    | 95.42(45.47-137.08)      | 77.51(27.87-126.99)    |
|             | Ischemic heart disease                | 88.72(62.41-116.59)     | 135.31(95.32-172.79)    | 105.88(71.3-147.12)     | 96.89(63.78-135.1)      | 85.72(53.26-125.99)     | 89.99(58.09-129.33)     | 142.85(100.1-194.45)     | 97.65(65.89-133.44)    | 71.85(47.04-100.45)    | 92.57(59.73-133.74)     | 92.64(64.98-127.18)      | 99.4(64.61-135.93)     |
|             | Tuberculosis                          | 76.46(61.34-93.14)      | 62.14(45.26-89.51)      | 136.28(100.82-180.56)   | 80.8(56.71-110.07)      | 94.59(67.04-128.4)      | 62.21(44.22-83.16)      | 125.02(94.38-160.1)      | 81.5(56.85-110.45)     | 62.46(48.47-80.16)     | 114.37(80.19-166.41)    | 87.4(67.77-110.63)       | 64.22(47.27-83.21)     |
|             | Cirrhosis and other CLD               | 67.77(54.36-84.71)      | 64.39(47.11-85.13)      | 67.69(47.91-96.86)      | 69.81(49.77-109.52)     | 61.27(41.97-95.02)      | 62.76(45.59-89.76)      | 85.23(63.09-110.6)       | 68.26(47.51-94.67)     | 62.08(47.46-79.96)     | 65.66(45.54-97.44)      | 83.29(63.9-105.55)       | 54.92(41.48-71.44)     |
|             | Neonatal disorders                    | 52.71(40.9-68.5)        | 16.1(11.09-22.75)       | 44.45(33.87-59.47)      | 57.29(44.18-76.61)      | 64.17(48.66-86.03)      | 48.45(35.4-64.97)       | 37.86(27.9-50.97)        | 48.12(35.08-64.51)     | 52.87(41.23-68.44)     | 58.13(45.01-75.57)      | 53.22(40.71-70.05)       | 36.68(28.12-48.97)     |
|             | Diabetes mellitus                     | 42.91(34.55-52.79)      | 52.16(38.03-66.76)      | 41.46(31.06-54.04)      | 40.78(30.07-54.27)      | 35.05(25.65-47.99)      | 42.99(32.07-56.64)      | 58.06(45.27-73.95)       | 47.66(34.6-62.99)      | 39.82(30.73-50.81)     | 37.28(26.72-50.43)      | 52.85(40.81-69.06)       | 44.74(34.01-57.75)     |
|             | Chronic obstructive pulmonary disease | 37.23(27.45-47.01)      | 31.25(21.58-40.55)      | 34.26(21.06-52.36)      | 39.54(26.94-56.88)      | 30.45(18.09-48.03)      | 29.39(19.87-40.86)      | 43.72(29.8-59.1)         | 34.55(23.27-47.07)     | 34.14(24.57-44.04)     | 33.95(19.8-66.13)       | 42.49(30.37-55.67)       | 40.26(28.31-56.43)     |
|             | Chronic kidney disease                | 30.52(24.68-37.3)       | 31.53(22.68-40.73)      | 30.22(22.83-39.45)      | 29.39(21.35-38.88)      | 26.46(18.69-35.83)      | 30.69(23.02-40.35)      | 38.92(29.18-49.46)       | 34.09(25.47-44.98)     | 28.79(21.38-37.04)     | 27.97(20.07-37.89)      | 36.57(27.88-46.89)       | 31.6(22.98-40.67)      |
|             | Hypertensive heart disease            | 25.76(11.84-54.39)      | 30.92(13.4-52.74)       | 26.83(12.93-52.48)      | 27.35(11.19-57.97)      | 24.05(10.64-48.36)      | 26.43(12.28-52.06)      | 34.09(17.54-64.32)       | 29.5(13.73-53.34)      | 22.54(8.66-51.2)       | 25.98(11.52-54.62)      | 27.47(13.37-55.78)       | 29.27(12.05-64.52)     |

|  | <b>Causes of death</b>                     | <b>Ethiopia</b>    | <b>Addis Ababa</b> | <b>Afar</b>        | <b>Amhara</b>      | <b>B/Gumuz</b>     | <b>Dire Dawa</b>   | <b>Gambella</b>    | <b>Harari</b>      | <b>Oromia</b>      | <b>Somali</b>      | <b>SNNP</b>        | <b>Tigray</b>      |
|--|--------------------------------------------|--------------------|--------------------|--------------------|--------------------|--------------------|--------------------|--------------------|--------------------|--------------------|--------------------|--------------------|--------------------|
|  | Alzheimer's disease and other dementias    | 25.49(6.12-72.01)  | 24.87(5.72-71.32)  | 22.9(5.34-64.22)   | 24.45(5.63-67.59)  | 22.7(5.32-64.39)   | 24.57(5.67-69.63)  | 24.44(5.63-69.92)  | 24.42(5.66-66.97)  | 26.36(6.32-72.44)  | 22.91(5.33-62.43)  | 26.62(6.19-72.11)  | 25.83(6.71-88)     |
|  | HIV/AIDS                                   | 25.4(20.93-30.96)  | 62.14(45.26-89.51) | 48.16(31.55-70.79) | 34.2(25.57-44.78)  | 21.95(12.86-36.41) | 56.99(32.15-86.93) | 58.41(42.26-89.85) | 38.77(22.88-76.17) | 16.9(10.64-25.06)  | 34.3(24.58-47.63)  | 15.27(9.85-22.29)  | 24.97(14.46-37.83) |
|  | Road injuries                              | 20.83(16.67-26.02) | 20.03(13.98-26.5)  | 22.34(16.05-30.68) | 20(14.72-26.67)    | 19.62(14.61-26.71) | 21.82(13.19-36.55) | 26.74(19.75-35.92) | 22.25(14.52-42.38) | 18.78(14.39-24.68) | 20.54(15.28-28.14) | 26.48(20.11-35.51) | 19.18(14.05-26.25) |
|  | Meningitis                                 | 15.43(12.72-18.73) | 11.55(8.4-15.21)   | 20.19(14.85-27.24) | 14.94(10.95-20.14) | 17.23(13.11-22.46) | 11.62(8.54-15.71)  | 18.45(13.61-23.94) | 14.53(10.43-19.51) | 13.78(10.71-17.58) | 20.39(14.63-27.46) | 18.15(14.02-22.86) | 12.2(8.57-16.33)   |
|  | Self-harm                                  | 14.5(10.89-19.63)  | 15.07(10.63-21.6)  | 14.94(10.59-21.77) | 14.25(9.73-22.46)  | 12.61(8.76-18.43)  | 12.18(8.45-18.42)  | 18.44(12.7-27.25)  | 13.79(9.47-21.16)  | 13.25(9.55-18.64)  | 13.43(9.28-19.52)  | 18.23(13.2-25.04)  | 12.69(8.29-20.7)   |
|  | Interpersonal violence                     | 14.45(11.39-18.39) | 11.91(8.14-16.93)  | 19.36(12.16-29.28) | 14.89(10.36-21.03) | 16.23(10.94-23.11) | 12.85(8.55-19.23)  | 19(12.76-28.25)    | 13.85(8.76-20.32)  | 11.87(8.71-16.11)  | 17.41(11.21-25.53) | 17.35(12.55-23.27) | 15.29(10.9-21.37)  |
|  | Prostate cancer                            | 13.83(7.51-22.04)  | 13.99(9.21-24.26)  | 10.68(6.04-16.39)  | 13.69(6.88-22.55)  | 11.1(5.56-18.46)   | 14.39(8.96-22.64)  | 15.04(10.62-22.31) | 14.76(9.76-22.57)  | 13.87(6.62-22.46)  | 10.77(5.04-17.78)  | 14.68(8.41-23.19)  | 15.47(8.11-24.84)  |
|  | Protein-energy malnutrition                | 12.87(9.87-17.19)  | 12.86(9.19-16.93)  | 33.48(24.29-46.28) | 4.73(2.93-10.23)   | 25.22(18.15-32.83) | 13.43(8.69-22.91)  | 16.73(12.18-23.43) | 12.46(8.14-20.46)  | 13.93(9.97-19.17)  | 29.72(20.7-43.45)  | 14.53(10.22-21.12) | 11.24(7.82-16.85)  |
|  | Paralytic ileus and intestinal obstruction | 11.51(8.4-16.56)   | 9.5(5.5-13.75)     | 10.86(6.99-17.19)  | 12.17(7.92-23.52)  | 10.95(7.09-19.16)  | 10.87(6.72-15.72)  | 12.57(8.46-17.35)  | 11.3(6.76-16.38)   | 10.15(7.17-14.42)  | 11.2(7.09-19.13)   | 14.35(9.29-18.98)  | 11.09(7.43-16.58)  |

Table S9. Age-standardised YLL rates per 100 000 population for all causes combined and leading fifteen causes in Ethiopia's regions and chartered cities, women and men, 2019  
YLLs = years of life lost

|             | Causes of YLL                              | Ethiopia                    | Addis Ababa                 | Afar                        | Amhara                     | B/Gumuz                    | Dire Dawa                  | Gambella                    | Harari                      | Oromia                      | Somali                      | SNNP                     | Tigray                      |
|-------------|--------------------------------------------|-----------------------------|-----------------------------|-----------------------------|----------------------------|----------------------------|----------------------------|-----------------------------|-----------------------------|-----------------------------|-----------------------------|--------------------------|-----------------------------|
| Female YLLs | All causes                                 | 26577.35(23737.66-29963.79) | 22406.34(18156.65-27566.68) | 45082.71(36941.74-54439.29) | 24309.9(21344.28-28052.02) | 42714.8(35285.33-51216.37) | 24472.68(20774.4-29063.37) | 23062.71(19659.37-26958.46) | 24647.64(20438.86-29811.54) | 25729.51(22546.55-29787.68) | 35828.89(29916.14-42775.25) | 27971(24105.43-32513.63) | 23650.79(19714.42-28204.49) |
|             | Neonatal disorders                         | 3148.55(2515.94-3959.73)    | 845.69(569.77-1184.48)      | 2678.72(2097.97-3468.9)     | 3395.67(2668.31-4318.45)   | 3837.75(2990.51-4941.23)   | 2854.04(2152.98-3705.69)   | 2208.36(1672.4-2899.85)     | 2828.51(2092.64-3688.39)    | 3188.83(2548.29-4015.62)    | 3473.65(2778.67-4355.3)     | 3157.79(2486.5-4050.02)  | 2180.68(1706.41-2797.08)    |
|             | Diarrheal diseases                         | 2321.88(1370.91-3911.37)    | 488.11(210.28-1202.45)      | 3147.85(1569.68-5463.39)    | 2395(1153.12-4816.22)      | 3322.39(1541.19-6372.74)   | 1319.21(593.17-2736.4)     | 1275.36(614.08-2347.17)     | 1435.04(651.44-2843.69)     | 2379.2(1348.64-4037.61)     | 2871.89(1452.32-5136.38)    | 2551.31(1411.14-4385.83) | 1520.6(776.09-2856.77)      |
|             | Lower respiratory infections               | 2134.4(1740.34-2579.97)     | 1046.19(790.46-1410.55)     | 3054.65(2338.89-3934.38)    | 1700.11(1184.09-2282.95)   | 3737.87(2779.7-4868.22)    | 1547.03(1096.03-2134.76)   | 1187.88(842.38-1528.97)     | 1753.37(12370.1)            | 2229.48(1787.05-2805.78)    | 3074.32(2310.11-3959.32)    | 2331.2(1821.45-2922.89)  | 1745.12(1338.15-2238.23)    |
|             | HIV/AIDS                                   | 1958.84(1578.86-2410.44)    | 5824.14(4215.45-7698.71)    | 3453.64(2290.68-4969.28)    | 2194.97(1493.34-2966.22)   | 1539.13(818.23-2696.06)    | 3862.23(2306.24-6102.92)   | 5929.51(3325.69-9305.26)    | 2124.49(1356.55-3218.93)    | 1482.6(1015.03-2120.63)     | 2476.2(1736.93-3439.63)     | 1181.33(772.06-1711.1)   | 1973.52(1100-2960.14)       |
|             | Stroke                                     | 1549.95(1188.54-1908.07)    | 1865.75(1407.33-2463.55)    | 3527.46(2600.12-4658.75)    | 1328.22(867.97-1799.31)    | 2943.71(2179.7-3911.56)    | 1418.44(981.27-1938.88)    | 1264.9(750.55-1753.67)      | 1645.74(1170.26-2210.21)    | 1420.12(1045.42-1835.18)    | 2155.22(1555.69-2878.22)    | 1554.69(1173.35-1993.9)  | 2037.08(1475.52-2694.31)    |
|             | Ischemic heart disease                     | 1340.16(959.64-1698.12)     | 1686.6(1241.23-2262.52)     | 2989.17(2190.61-4095.93)    | 1101.42(707.03-1529.79)    | 2539.66(1828.7-3373.8)     | 1273.5(806.95-1767.24)     | 1127.4(639.42-1538.09)      | 1417.63(988.87-1898.24)     | 1309.83(875.52-1731.84)     | 1810.37(1277.27-2480)       | 1380.92(1003.59-1801.52) | 1526.85(1017.9-2119.85)     |
|             | Tuberculosis                               | 1202.54(930.48-1590.75)     | 791.41(534.48-1177.11)      | 4417.79(3125.46-6021.84)    | 1010.9(607.79-1616.5)      | 3303.63(2355.17-4443.97)   | 792.09(476.05-1149.52)     | 785.79(527.74-1056.19)      | 1069.01(532.39-1610.62)     | 1068.02(774.6-1255.65)      | 2671.86(1748.81-4700.12)    | 1279.33(936.28-1786.35)  | 915.56(639-1363.33)         |
|             | Maternal disorders                         | 870.11(630.75-1186.06)      | 284.7(167.43-482.47)        | 2473.91(1568.46-3755.96)    | 560.35(345.66-840.3)       | 2223.66(1479.96-3070.27)   | 493.51(317.46-823.28)      | 302.64(186.91-446.7)        | 580.13(351.82-996.02)       | 870.93(573.24-1286.61)      | 1798.67(1135.6-2579.23)     | 938.37(603.7-1374.17)    | 828.59(518.14-1241.9)       |
|             | Cirrhosis and other chronic liver diseases | 844.92(643.41-1081.32)      | 767.23(530.19-1111)         | 1477.11(1005.71-2111.13)    | 705.08(438.81-1094.11)     | 1268.13(823.35-1788.96)    | 742.46(487.63-1153.92)     | 616.51(374.23-967.24)       | 797.97(538.4-1177.01)       | 854.55(632.2-1108.8)        | 965.63(678.23-1334.07)      | 975.09(722.61-1286.58)   | 834.15(581.82-1151.11)      |
|             | Malaria                                    | 661.8(132.28-1729.36)       | 75.01(4.88-291.22)          | 388.58(32.36-1241.73)       | 619.21(75.96-1724.78)      | 1329.62(162.8-3889.59)     | 1500.31(174.59-3555.44)    | 1073.79(246.87-2660)        | 1354.94(187.95-3465.16)     | 628.85(109.15-1728.03)      | 634.96(76.66-1764.77)       | 836.64(186.45-2363.05)   | 480.01(66.43-1500.34)       |
|             | Hypertensive heart disease                 | 615.33(344.14-975.83)       | 599.93(258.29-1046.83)      | 1236.02(622.82-1912.4)      | 538.24(281.05-969.91)      | 1027.97(523.23-1560.39)    | 558.14(249.52-1056.61)     | 501.45(250.79-1172.39)      | 630.54(274.1-1163.21)       | 603.45(319.28-947.26)       | 786.53(420.09-1264.21)      | 661.84(355.42-957.68)    | 676.24(363.84-1061.57)      |
|             | Congenital birth defects                   | 606.05(365.52-984.56)       | 270.1(125.64-502.34)        | 497.05(289.37-830.67)       | 695.16(334.44-1304.29)     | 875.04(398.84-1634.63)     | 511.78(284.73-887.71)      | 356.98(211.42-594.68)       | 505.02(290.54-854.73)       | 570.35(336.97-957.47)       | 711.22(390.55-1284.29)      | 622.16(347.11-1101.79)   | 455.95(276.31-731.45)       |

|                                            | Causes of YLL                         | Ethiopia                            | Addis Ababa                        | Afar                                | Amhara                              | B/Gumuz                            | Dire Dawa                           | Gambella                           | Harari                              | Oromia                              | Somali                              | SNNP                               | Tigray                        |
|--------------------------------------------|---------------------------------------|-------------------------------------|------------------------------------|-------------------------------------|-------------------------------------|------------------------------------|-------------------------------------|------------------------------------|-------------------------------------|-------------------------------------|-------------------------------------|------------------------------------|-------------------------------|
| Male YLLs                                  | Diabetes mellitus                     | 559.48(46<br>0.23-<br>657.75)       | 564.4(409<br>765.33)               | 1099.2(816<br>.39-<br>1427.18)      | 425.86(30<br>7.67-<br>558.48)       | 947.03(692<br>.62-<br>1251.85)     | 479.39(34<br>1.43-<br>641.5)        | 360.77(249<br>.04-<br>460.82)      | 541.34(39<br>0.53-<br>737.61)       | 581.79(450<br>.19-<br>738.19)       | 680.47(495<br>.44-<br>920.26)       | 643.57(504<br>.23-<br>808.72)      | 598.37(44<br>5.45-<br>781.74) |
|                                            | Meningitis                            | 536.36(42<br>8.35-<br>669.49)       | 310.97(22<br>1.63-<br>442.47)      | 1130.56(82<br>0.29-<br>1495.09)     | 446.59(30<br>7.74-<br>654.68)       | 1059.11(74<br>8.76-<br>1417.27)    | 356.18(24<br>3.63-<br>509.64)       | 285.66(202<br>.13-<br>414.96)      | 444.02(29<br>5.24-<br>645.76)       | 506.49(378<br>.55-<br>677.64)       | 946.33(669<br>.45-<br>1321.31)      | 592.89(441<br>.26-<br>774.39)      | 378.53(27<br>3.67-<br>518.53) |
|                                            | Cervical cancer                       | 489.24(33<br>7.23-<br>795.31)       | 449.12(29<br>3.76-<br>664.13)      | 1065.1(657<br>.58-<br>1551.95)      | 369.08(22<br>8.7-<br>704.76)        | 871.23(535<br>.28-<br>1240.63)     | 370.92(24<br>6.31-<br>610.4)        | 306.97(203<br>.46-<br>565.12)      | 421.69(26<br>8.74-<br>646.41)       | 497.91(314<br>.48-<br>880.77)       | 638.55(392<br>.84-<br>1067.6)       | 560.52(361<br>.66-<br>898.57)      | 504.26(31<br>7.08-<br>837.09) |
|                                            | Protein-energy malnutrition           | 466.88(30<br>6.54-<br>683.44)       | 196.2(144<br>.48-<br>262.1)        | 1030.89(65<br>2.86-<br>1511.77)     | 285.2(64.0<br>4-693.92)             | 1141.64(74<br>5.78-<br>1649.2)     | 331.33(18<br>4.68-<br>542.16)       | 214.04(94.<br>9-358.96)            | 328.79(17<br>0.54-<br>565.35)       | 490.84(289<br>.54-<br>763.99)       | 1359.62(67<br>1.37-<br>2322.56)     | 429.08(246<br>.38-<br>691.79)      | 251.69(15<br>2.82-<br>386.79) |
|                                            | Breast cancer                         | 453.81(36<br>0.68-<br>557.49)       | 788.38(52<br>2.16-<br>1160.51)     | 715.81(503<br>.68-<br>1006.69)      | 325.87(21<br>3.22-<br>517.15)       | 663.97(463<br>.72-<br>947.21)      | 461.65(32<br>8.44-<br>684.08)       | 349.62(242<br>.06-<br>523.01)      | 516.12(35<br>4.4-<br>748.03)        | 452.22(343<br>.8-572.35)            | 380.76(239<br>.35-<br>623.46)       | 532.9(393.<br>26-676.65)           | 463.27(31<br>6.12-<br>655.03) |
|                                            | Whooping cough                        | 430.96(44.<br>89-<br>1217.46)       | 74.84(2.4<br>7-298.53)             | 659.95(30.<br>18-2290.3)            | 465.57(19.<br>61-<br>1764.87)       | 498.17(14.<br>66-<br>2265.84)      | 219.03(8.<br>87-989.3)              | 292.78(11.<br>76-<br>1097.14)      | 408.03(12.<br>23-<br>1589.82)       | 410.78(27.<br>89-<br>1267.09)       | 699.7(30.8<br>9-2582.5)             | 418.83(16.<br>06-<br>1646.67)      | 189.83(7.<br>24-<br>772.12)   |
|                                            | Chronic kidney disease                | 425.36(35<br>4.19-<br>503.84)       | 277.1(100<br>.25-<br>398.32)       | 747.87(546<br>.21-<br>1025.87)      | 307.95(23<br>2.31-<br>424.16)       | 682.5(489.<br>02-934.19)           | 391.72(28<br>8.42-<br>533.73)       | 273.01(214<br>.33-<br>377.31)      | 440.6(323.<br>47-<br>608.57)        | 454.6(352.<br>43-552.98)            | 467.07(336<br>.11-<br>661.46)       | 506.68(396<br>.63-<br>624.49)      | 416.32(30<br>6.92-<br>572.72) |
|                                            | Chronic obstructive pulmonary disease | 338.09(23<br>1.23-<br>446.98)       | 55.64(38.<br>66-79.93)             | 450.84(232<br>.44-<br>956.79)       | 320.67(21<br>0.93-<br>500.49)       | 416.11(197<br>.32-877.8)           | 200.19(11<br>8.93-<br>317.31)       | 162.91(102<br>.25-<br>290.17)      | 256.54(15<br>4.7-<br>367.31)        | 335.7(228.<br>75-447.28)            | 337.76(174<br>.18-<br>657.04)       | 364.81(241<br>.08-<br>501.35)      | 379.08(23<br>2.17-<br>549.52) |
| All causes                                 | 33656.53(<br>29329.57-<br>38434.03)   | 27213.18(<br>21615.54-<br>33156.63) | 38024.59(3<br>0891.2-<br>46081.88) | 34944.14(<br>29673.75-<br>40742.87) | 38301.56(3<br>1537.43-<br>45911.41) | 31504.05(<br>26574.2-<br>37743.06) | 40161.08(3<br>3217.41-<br>48311.31) | 33638.8(2<br>7653.79-<br>40521.79) | 30159.08(2<br>5750.84-<br>35341.45) | 39100.96(3<br>2276.84-<br>46571.16) | 37724.94(3<br>1927.22-<br>44383.04) | 29250.6(2<br>4341.36-<br>34727.67) |                               |
| Neonatal disorders                         | 4682.38(3<br>633.09-<br>6085.01)      | 1430.26(9<br>85.73-<br>2021.49)     | 3948.63(30<br>09.22-<br>5283.55)   | 5088.34(3<br>923.98-<br>6804.45)    | 5700.11(43<br>21.17-<br>7641.59)    | 4304.31(3<br>145.2-<br>5772.5)     | 3363.55(24<br>78.88-<br>4529.27)    | 4275.07(3<br>116.29-<br>5732.05)   | 4697.04(36<br>63.04-<br>6079.78)    | 5163.87(39<br>98.38-<br>6714.02)    | 4727.98(36<br>16.51-<br>6223.29)    | 3259.17(2<br>498.22-<br>4351.09)   |                               |
| Diarrheal diseases                         | 3025.56(1<br>811.69-<br>4105.96)      | 950.49(30<br>8.5-<br>1640.3)        | 3037.6(166<br>5.27-<br>4678.37)    | 3364.44(1<br>517.97-<br>5428.03)    | 3580.36(18<br>85.73-<br>5841.46)    | 1751.52(8<br>68.27-<br>2704.4)     | 2293.72(10<br>16.02-<br>3551.67)    | 1991.36(9<br>60.55-<br>3129.7)     | 2884.32(17<br>69.56-<br>4279.79)    | 3405.3(202<br>5.35-<br>5314.91)     | 3209.66(19<br>35.99-<br>4563.03)    | 2264.94(1<br>098.16-<br>3390.06)   |                               |
| Lower respiratory infections               | 2664.11(2<br>219.4-<br>3258.11)       | 1564.82(1<br>198.17-<br>2064.01)    | 2679.49(20<br>59.02-<br>3452.98)   | 2346.51(1<br>757.18-<br>3136.8)     | 3431.02(25<br>21.89-<br>4594.11)    | 2139.78(1<br>634.49-<br>2791.32)   | 2731.26(21<br>20.34-<br>3413.15)    | 2417.27(1<br>818.81-<br>3169.53)   | 2622.97(20<br>73.95-<br>3281.37)    | 3332.03(25<br>20.57-<br>4287.02)    | 3059.89(24<br>41.07-<br>3791.68)    | 2220.79(1<br>719.29-<br>2794.87)   |                               |
| Tuberculosis                               | 2251.18(1<br>806.41-<br>2749.76)      | 1779.88(1<br>304.02-<br>2437.84)    | 4156.58(29<br>51.01-<br>5670.73)   | 2392.68(1<br>679.45-<br>3319.8)     | 2966.72(21<br>31.16-<br>4031.18)    | 1753.34(1<br>233.41-<br>2412.94)   | 3591.54(26<br>03.4-<br>4792.09)     | 2352.81(1<br>627.98-<br>3212.92)   | 1771.28(13<br>68.8-<br>2282.32)     | 3510.85(24<br>84.87-<br>5036.19)    | 2593.55(19<br>98.93-<br>3326.96)    | 1818.94(1<br>331.07-<br>2400.92)   |                               |
| Cirrhosis and other chronic liver diseases | 1804.71(1<br>430.63-<br>2302.66)      | 1739.01(1<br>243.83-<br>2364.8)     | 1892.92(13<br>01.77-<br>2823.22)   | 1836.64(1<br>289.9-<br>2998.4)      | 1697.07(11<br>53.74-<br>2690.87)    | 1626.37(1<br>142.18-<br>2415.62)   | 2264.16(16<br>30.5-<br>3005.34)     | 1790.5(12<br>06.21-<br>2554.03)    | 1633.51(12<br>06.25-<br>2115.94)    | 1794.7(122<br>8.08-<br>2745.58)     | 2241.64(16<br>86.15-<br>2866.89)    | 1419.93(1<br>031.37-<br>1929.97)   |                               |
| Stroke                                     | 1728.49(1<br>241.17-<br>2251.22)      | 2329.5(16<br>46.94-<br>3020.93)     | 2181.21(15<br>03.97-<br>2948.8)    | 1847.02(1<br>229.59-<br>2602.38)    | 1745.62(11<br>15.99-<br>2526.67)    | 1741.3(11<br>65.67-<br>2451.38)    | 2961.1(205<br>9.18-<br>3962.38)     | 2061.13(1<br>385.18-<br>2857.7)    | 1353.04(89<br>4.72-<br>1863.23)     | 1979.69(13<br>10.41-<br>2479.74)    | 1836.74(12<br>92.24-<br>2479.74)    | 2092.17(1<br>414.39-<br>2834.27)   |                               |

| Causes of YLL                         | Ethiopia                | Addis Ababa              | Afar                     | Amhara                   | B/Gumuz                  | Dire Dawa                | Gambella                 | Harari                   | Oromia                  | Somali                   | SNNP                    | Tigray                  |
|---------------------------------------|-------------------------|--------------------------|--------------------------|--------------------------|--------------------------|--------------------------|--------------------------|--------------------------|-------------------------|--------------------------|-------------------------|-------------------------|
| Ischemic heart disease                | 1706.61(192.62-2270.82) | 2620.28(1821.43-3428.99) | 2142.03(1446.55-3057.05) | 1837.38(183.31-2613.28)  | 1681.97(1034.33-2517.89) | 1665.25(1048.82-2446.4)  | 2872.96(1953.81-3993.65) | 1862.4(1238.14-2606.79)  | 1337.48(867.41-1898.39) | 1820.8(1160.19-2655.37)  | 1851.36(1286.26-2565.1) | 1860.4(1177.85-2618.59) |
| HIV/AIDS                              | 1197.32(977.12-1503.43) | 2860.18(2090.46-4049.43) | 2212.1(1441.51-3285.91)  | 1637.83(1216.13-2146.01) | 1118.4(649.87-1856.06)   | 2876.88(1703.04-4341.24) | 3010.49(2158.53-4559.08) | 2088.36(1195.27-3874.96) | 830.63(537.47-1258.84)  | 1592.43(1099.36-2247.18) | 719.67(449.97-1065.04)  | 1179.29(652.42-1832.12) |
| Congenital birth defects              | 859.32(486.01-1440.44)  | 318.41(156.82-626.32)    | 663.56(380.05-1116.94)   | 1029.22(497.97-1792.39)  | 1164.71(536.84-2046.96)  | 711.94(407.46-1166.35)   | 527.06(332.78-829.87)    | 704.95(398.78-1171.16)   | 803.36(466.08-1376.69)  | 1003.66(482.15-1711.62)  | 863.26(449.03-1490.38)  | 645.1(397.43-992.97)    |
| Diabetes mellitus                     | 846.38(679.54-1043.36)  | 1030.07(738.34-1366.95)  | 854.19(623.77-1128.5)    | 798.14(583.25-1074.09)   | 711.9(505.2-1000.09)     | 816.96(599.2-1109.51)    | 1183.11(883.3-1533.67)   | 931.89(677.21-1254.05)   | 763.6(587.32-981.7)     | 758.47(539.56-1038.67)   | 1068.39(808.35-1399.24) | 862.85(645.72-1120.5)   |
| Road injuries                         | 749(600.42-939.13)      | 695.67(491.98-949.94)    | 833.6(573.91-1182.21)    | 717.81(540.81-955.11)    | 793.27(595.75-1057.79)   | 748.64(449.97-1239.03)   | 926.36(668.52-1272.24)   | 779.25(496.65-1476.92)   | 680.08(117.89-1924.22)  | 784.97(575.7-1078.84)    | 958.74(727.81-1295.06)  | 660.74(485.09-925.27)   |
| Malaria                               | 703.9(134.7-1873.08)    | 86.93(4.62-372.32)       | 364.63(30.35-1148.23)    | 666.7(80.36-1774.44)     | 1324.42(152.65-3826.95)  | 1634.74(10.17-3979.14)   | 1215.64(262.28-3063.17)  | 1420.69(210.17-3595.05)  | 680.08(117.89-1924.22)  | 632.53(76.45-1741.94)    | 886.8(194.34-2654.64)   | 518.77(65.58-1650.59)   |
| Meningitis                            | 683.37(556.69-842.07)   | 410.88(298.05-560.18)    | 852.26(622.25-1163.27)   | 626.28(466.37-826.02)    | 901.69(663.65-1206.68)   | 491.16(350.83-691.99)    | 691.89(502.55-919.16)    | 608.34(427.59-830.4)     | 620.1(472.96-804.25)    | 984.46(730.1-1324.73)    | 806.79(623.93-1033.79)  | 465.64(339.56-627.05)   |
| Interpersonal violence                | 625.61(495.71-794.8)    | 531(355.18-773.73)       | 870.01(533.21-1347.84)   | 635.64(442.84-898.88)    | 734.56(501.23-1036.96)   | 552.43(358.97-828.32)    | 813.35(526.23-1233.34)   | 595.66(370.01-883.93)    | 514.63(377.14-706.59)   | 768.96(502.3-1133.53)    | 747.7(543.47-1015.77)   | 651.95(458.51-921.14)   |
| Chronic obstructive pulmonary disease | 622.52(452.07-802.81)   | 527.5(365.06-696.7)      | 586.62(359.04-923.57)    | 660.62(429.85-988.3)     | 512.01(297.02-829.87)    | 475.64(317-681.16)       | 754.35(511.05-1034.17)   | 573.89(377.13-796.41)    | 556.21(393.6-739.41)    | 574.79(328.01-1175.1)    | 731.22(507.64-980.09)   | 666.46(451.77-956.9)    |
| Chronic kidney disease                | 614.99(503.4-754.81)    | 636.63(465.16-828.23)    | 638.54(476.47-835.13)    | 587.56(422.19-784.42)    | 565.15(400.4-773.66)     | 596.8(443.17-797.34)     | 794.3(585.45-1039.93)    | 679.13(499.6-915.59)     | 563.26(428.67-724.42)   | 584.38(409.61-808.42)    | 758.71(578.93-976.18)   | 617.34(451.62-799.22)   |
| Self-harm                             | 467.22(347.56-620.06)   | 500.79(345.46-734.78)    | 510.65(344.94-742.64)    | 449.92(304.24-704.81)    | 431.45(300.62-616.18)    | 381.25(262.75-579.65)    | 597.85(393.79-900.46)    | 443.59(297.67-666.93)    | 416.89(293.5-575.56)    | 445.74(308.88-627.14)    | 599.95(431.96-796.88)   | 402.77(264.43-649.46)   |
| Hypertensive heart disease            | 463.51(210.4-971.39)    | 553.77(240.32-974.1)     | 501.27(241.63-988.92)    | 487.5(193.6-1048.26)     | 439.79(193.66-898.45)    | 463.16(211.79-903.69)    | 635.09(323.36-1206.21)   | 527.81(242.86-952.33)    | 398.22(150.21-931.14)   | 476.78(210.46-1040.72)   | 503.8(244.09-1042.08)   | 515.21(208.54-1174.33)  |
| Protein-energy malnutrition           | 426.48(318.27-595.75)   | 266.9(191.65-353.5)      | 851.03(604.72-1184.1)    | 182.71(98.05-371.9)      | 960.06(634.55-1426.32)   | 349.96(204.64-646.63)    | 372.35(267.44-547.31)    | 319.48(192.7-564.42)     | 465.7(318.65-687.01)    | 962.59(638.38-1464.1)    | 443.78(296.98-699.74)   | 264.78(182.69-402.11)   |
| Whooping cough                        | 369.4(39.15-1054.07)    | 64.23(1.77-260.38)       | 556.51(22.57-2066.22)    | 417.53(16.2-1591.76)     | 410.61(10.73-1875.28)    | 196.21(7.89-909.65)      | 272.25(10.58-1063.16)    | 362.67(9.84-1596.67)     | 346.01(22.15-1136.36)   | 592.82(24.75-2223.26)    | 353.38(13.89-1457.77)   | 159.35(5.74-659.4)      |

Table S10. Age-standardised YLDs rates per 100 000 population for all causes combined and leading fifteen causes in Ethiopia's regions and chartered cities, women, men, 2019

YLDs = years lived with disability

|             | Causes of YLDs                                    | Ethiopia                   | Addis Ababa                | Afar                       | Amhara                     | B/Gumuz                    | Dire Dawa                  | Gambella                   | Harari                     | Oromia                     | Somali                    | SNNP                       | Tigray                     |
|-------------|---------------------------------------------------|----------------------------|----------------------------|----------------------------|----------------------------|----------------------------|----------------------------|----------------------------|----------------------------|----------------------------|---------------------------|----------------------------|----------------------------|
| Female YLDs | All causes                                        | 11382.48(8537.97-14723.99) | 11055.27(8288.81-14217.11) | 12125.07(9023.58-15673.76) | 11175.31(8326.77-14595.53) | 11527.37(8635.24-14939.59) | 11753.92(8818.05-15166.15) | 11861.81(8936.95-15380.08) | 11596.95(8665.25-14917.64) | 11374.66(8486.34-14721.09) | 12660.26(9472.6-16439.19) | 11371.26(8499.87-14701.67) | 11060.79(8342.68-14331.51) |
|             | Gynecological diseases                            | 937.02(641312.53)          | 918.8(624.96-1294.82)      | 955.65(660.15-1348.46)     | 928.48(630.7-1301.29)      | 930.44(634-1301.9)         | 936.74(641.82-1318.45)     | 931.95(634.96-1307.48)     | 943.22(647.53-1324.24)     | 938.51(641314.15)          | 988.34(680.57-1372.16)    | 935.48(643.78-1315.47)     | 929.52(632.56-1296.85)     |
|             | Depressive disorders                              | 876.14(607.07-1200.73)     | 916.24(636.27-1255.78)     | 852.18(592.17-1181.42)     | 874.95(604.9-1200.22)      | 861.44(601.17-1188.5)      | 865.97(603.95-1191.27)     | 864.72(601.48-1189.01)     | 867.43(602.3-1195.76)      | 880.88(604.99-1211.79)     | 841.97(585.54-1159.84)    | 871.94(608.29-1199.31)     | 869.54(610.51-1200.61)     |
|             | Low back pain                                     | 670.17(474.44-901.3)       | 610.38(431.4-815.61)       | 645.72(454.55-869.53)      | 664.55(469.47-884.29)      | 668.49(468.35-901.15)      | 621.55(438.71-829.77)      | 670.45(475.74-906.56)      | 620.65(438.08-831.55)      | 683.47(483.4-921.45)       | 649.04(458.05-877.26)     | 678.98(481.97-901.61)      | 667.66(469.41-904.11)      |
|             | Age-related and other hearing loss                | 533.56(367.08-750.82)      | 480.5(327.01-682.39)       | 548.22(376.41-773.21)      | 539.28(369.02-752.63)      | 535.05(367.46-752.65)      | 503.75(344.34-704.76)      | 517.58(354.58-730.11)      | 504.17(345.13-703.92)      | 536.02(366.36-750.36)      | 558.39(385.62-775.93)     | 529.69(361.56-737.69)      | 527.87(361.94-739.36)      |
|             | Blindness and vision loss                         | 460.45(331.27-616)         | 403.88(287.54-548.44)      | 393.28(282.66-538.97)      | 438.74(314.83-592.04)      | 377.07(271.74-514.48)      | 505.52(360.74-677.85)      | 483.33(347.43-651.86)      | 524.75(377.43-699.71)      | 430.31(115.55-892.03)      | 390.69(280.76-528.2)      | 616.96(440.03-829.3)       | 404.81(286.89-550.62)      |
|             | Headache disorders                                | 428.86(117.86-896.33)      | 426.05(116.88-897)         | 444.19(127.36-898.29)      | 430.17(117.19-898.85)      | 445.93(126.44-920.54)      | 445.79(127.66-922.1)       | 444.82(127.73-924.4)       | 445.49(125.8-923.36)       | 430.73(308.99-579.99)      | 442.53(126.45-911.67)     | 413.04(116.25-864.73)      | 446.98(128.18-935.73)      |
|             | Dietary iron deficiency                           | 422.68(281.03-611)         | 350.86(215.03-535.74)      | 715.33(470.55-1066.79)     | 282.54(178.89-424.94)      | 324.08(205.82-490.27)      | 678.41(429.33-995.17)      | 412.14(248.05-621.67)      | 480.73(298.53-717.71)      | 422.87(273.58-626.97)      | 1168.84(790.81-1671.83)   | 368.03(236.25-554.69)      | 342.33(210.91-515.64)      |
|             | Anxiety disorders                                 | 403.21(281.23-552.51)      | 404.4(283.99-559.84)       | 403.68(279.87-561.64)      | 402.96(277.71-555.64)      | 401.66(277.35-558.7)       | 403.63(280.09-551.56)      | 402.92(275.61-555.76)      | 402.96(276.03-550.8)       | 403.47(279.41-553.15)      | 401.69(282.15-552.95)     | 402.62(282.61-550.75)      | 404.68(283.62-568.33)      |
|             | Neonatal disorders                                | 296.71(226.62-374.97)      | 402.75(313.39-508.02)      | 314.7(236.49-397.52)       | 301.29(227.66-389.19)      | 250.4(183.01-324.58)       | 326.26(248.93-417.8)       | 327.27(249.11-411.58)      | 310.51(233.29-394.34)      | 299.99(225.03-382.64)      | 317.35(244.01-400.1)      | 250.44(181.41-331.08)      | 329.58(255.4-418.33)       |
|             | Endocrine, metabolic, blood, and immune disorders | 286.75(192.59-401.36)      | 318.76(211.34-451.67)      | 303.95(204.52-423.37)      | 276.52(184.25-392.69)      | 274.36(184.71-391.15)      | 326.91(217.21-458.86)      | 288.3(190.89-405.24)       | 311.82(209.69-441.6)       | 284.41(194.09-405.25)      | 332.83(224.43-463.63)     | 280.05(187.08-401.02)      | 282.06(188.28-396.03)      |
|             | Diabetes mellitus                                 | 261.61(180.32-360.2)       | 288.75(195.41-394.88)      | 324.29(221.35-443.78)      | 228.22(155.96-313.83)      | 323.22(220.09-436.84)      | 260.86(177.36-359.58)      | 236.78(161.84-324.27)      | 285.98(191.4-394.51)       | 252.17(136.35-422.88)      | 292.06(201.72-403.65)     | 280.11(191.42-384.21)      | 272.51(186.63-375.76)      |
|             | Oral disorders                                    | 252.28(135.77-422.93)      | 253.22(134.69-434.24)      | 250.74(136.58-421.79)      | 252.75(136.72-423.71)      | 251.46(135.77-422.33)      | 252.29(132.91-427.44)      | 251.85(134.97-422.91)      | 252.34(134.1-425.91)       | 252.17(136.35-422.88)      | 250.56(135.88-415.86)     | 252.14(137.56-425.66)      | 252.16(135.44-422.43)      |

|                                    | Causes of YLDs                        | Ethiopia                           | Addis Ababa                       | Afar                               | Amhara                             | B/Gumuz                            | Dire Dawa                         | Gambella                           | Harari                             | Oromia                             | Somali                             | SNNP                             | Tigray                             |
|------------------------------------|---------------------------------------|------------------------------------|-----------------------------------|------------------------------------|------------------------------------|------------------------------------|-----------------------------------|------------------------------------|------------------------------------|------------------------------------|------------------------------------|----------------------------------|------------------------------------|
|                                    | Other musculoskeletal disorders       | 251.86(15<br>5.73-<br>361.59)      | 323.12(20<br>1.14-<br>465.18)     | 240.29(14<br>8.11-<br>348.95)      | 243.84(14<br>4.01-<br>356.41)      | 253.26(16<br>0.07-<br>366.83)      | 276.43(17<br>1.66-<br>402.24)     | 239.43(14<br>0.54-<br>357.84)      | 249.27(13<br>9.68-<br>377.28)      | 252.99(15<br>8.71-<br>368.33)      | 219.68(13<br>3.82-<br>322.98)      | 251.51(14<br>9.94-<br>364.58)    | 239.56(13<br>8.56-<br>358.86)      |
|                                    | Osteoarthritis                        | 210.2(107<br>.05-<br>410.19)       | 224.16(11<br>3.43-<br>444.55)     | 208.58(10<br>5.74-<br>408.88)      | 209.52(10<br>5.72-<br>413.28)      | 209.02(10<br>5.44-<br>409.35)      | 216.68(10<br>9.85-<br>425.61)     | 211.35(10<br>7.22-<br>417.6)       | 215.78(10<br>8.62-<br>424.27)      | 209.38(10<br>6.9-<br>414.66)       | 207.09(10<br>4.32-<br>412.58)      | 208.73(10<br>6.33-<br>409.52)    | 211.29(10<br>7.16-<br>415.59)      |
|                                    | Diarrheal diseases                    | 206.87(14<br>3.22-<br>286.77)      | 167.07(11<br>4-230.52)            | 202.73(13<br>9.58-<br>282.51)      | 202.77(14<br>0.57-<br>282.78)      | 246.98(16<br>9.23-<br>342.5)       | 179.09(12<br>3.43-<br>247.02)     | 216.99(14<br>8.71-<br>299.52)      | 200.79(13<br>8.17-<br>277.23)      | 210.63(14<br>5.06-<br>292.03)      | 217.36(14<br>9.38-<br>299.66)      | 215.46(14<br>8.52-<br>299.17)    | 187.56(12<br>9.36-<br>262.76)      |
|                                    | Schistosomiasis                       | 167.61(86<br>.66-<br>307.59)       | 0(0-0)                            | 65.03(36.<br>69-<br>104.29)        | 244.52(12<br>2.95-<br>460.12)      | 23.66(11.<br>92-43)                | 106.18(57<br>.15-<br>188.45)      | 21.26(11.<br>21-38.35)             | 0(0-0)                             | 155.11(80<br>.52-<br>286.17)       | 49.6(29.6<br>2-77.54)              | 192.4(99.<br>68-<br>352.41)      | 158.67(80<br>.48-<br>290.02)       |
|                                    | Stroke                                | 162.88(11<br>6.71-<br>208.92)      | 248.01(17<br>6.92-<br>321.06)     | 211.68(15<br>2.9-<br>270.83)       | 151.16(10<br>7.65-<br>193.51)      | 206.47(14<br>8.68-<br>264.66)      | 195.56(13<br>8.41-<br>251.49)     | 178.37(12<br>9.1-227.5)            | 209.87(15<br>2.17-<br>270.08)      | 158.68(11<br>3.92-<br>202.66)      | 186.98(13<br>5.48-<br>240.41)      | 147.93(10<br>6.74-<br>189.84)    | 179.18(12<br>8.3-<br>230.88)       |
|                                    | Chronic obstructive pulmonary disease | 151.09(12<br>3.1-<br>177.92)       | 188.54(15<br>3.53-<br>223.58)     | 181.48(14<br>8.29-<br>215.08)      | 134.31(10<br>8.37-<br>159.73)      | 183.4(149<br>.71-<br>217.96)       | 218.14(17<br>7.62-<br>256.85)     | 181.88(14<br>9.98-<br>213.58)      | 240.51(19<br>6.93-<br>283.87)      | 148.3(119<br>.4-176.39)            | 159.52(12<br>8.41-<br>189.35)      | 159.95(12<br>7.65-<br>190.39)    | 156.42(12<br>6.69-<br>185.52)      |
|                                    | HIV/AIDS                              | 150.26(99<br>.38-<br>216.86)       | 457.01(28<br>9.67-<br>677.42)     | 226.78(12<br>9.17-<br>378.78)      | 179.14(11<br>4.75-<br>273.77)      | 133.11(77<br>.18-<br>220.11)       | 340.71(20<br>1.84-<br>548.76)     | 509.28(29<br>3.82-<br>832.48)      | 280.87(16<br>5.97-<br>433.2)       | 111.86(69<br>.31-<br>179.19)       | 116.81(60<br>.64-<br>219.27)       | 86.01(50.<br>6-137.57)           | 163.64(95<br>.66-<br>248.21)       |
|                                    | Neck pain                             | 144.92(96<br>.17-<br>208.83)       | 145.27(95<br>.88-<br>209.07)      | 144.56(95<br>.17-209.1)            | 144.96(95<br>.47-<br>209.13)       | 144.84(95<br>.47-<br>209.26)       | 144.82(94<br>.56-<br>208.44)      | 144.56(95<br>.47-<br>208.44)       | 144.75(94<br>.72-<br>208.69)       | 144.88(95<br>.17-<br>207.27)       | 144.28(95<br>.01-<br>207.88)       | 144.91(95<br>.67-<br>209.24)     | 145.09(95<br>.74-<br>210.09)       |
|                                    | All causes                            | 10216.18(<br>7567.67-<br>13239.59) | 9733.58(7<br>310.32-<br>12486.45) | 10564.76(<br>7902.97-<br>13664.01) | 10159.72(<br>7543.61-<br>13229.83) | 10080.18(<br>7549.55-<br>13018.51) | 10341.9(7<br>684.04-<br>13313.56) | 10751.49(<br>8052.45-<br>13289.89) | 10302.94(<br>7651.18-<br>13253.29) | 10207.93(<br>7554.02-<br>13253.29) | 10526.65(<br>7856.67-<br>13631.36) | 10235.5(7<br>624.2-<br>13303.87) | 10180.33(<br>7611.62-<br>13237.34) |
|                                    | Male YLDs                             | Depressive disorders               | 741.81(51<br>2.52-<br>1026.44)    | 700.7(480<br>.68-<br>975.73)       | 729.47(50<br>5.54-<br>1017.69)     | 742.96(51<br>0.27-<br>1030.21)     | 734.51(50<br>7.26-<br>1014.71)    | 738.25(51<br>1.34-<br>1019.66)     | 734.69(50<br>5.63-<br>1011.85)     | 739.69(51<br>6-<br>1030.27)        | 751.31(51<br>8.31-<br>1038.79)     | 723.37(49<br>8.24-<br>1000.78)   | 741.38(51<br>2.52-<br>1021.5)      |
| Low back pain                      |                                       | 730.24(51<br>3.7-<br>979.26)       | 665.64(46<br>5.54-<br>897.5)      | 706.79(49<br>6.78-<br>950.63)      | 723.18(51<br>3.03-<br>978.85)      | 729.94(51<br>0.42-<br>985.79)      | 678.75(47<br>3.89-<br>914.66)     | 726.82(51<br>6.37-<br>972.22)      | 676.47(47<br>6.45-<br>913.36)      | 744.64(51<br>9.57-<br>1002.29)     | 710.84(49<br>6.12-<br>962.81)      | 739.37(51<br>6.13-<br>1000.25)   | 726.38(51<br>5.39-<br>982.37)      |
| Age-related and other hearing loss |                                       | 571.04(39<br>4.85-<br>807.16)      | 517.47(35<br>2.99-<br>731.13)     | 584.61(40<br>0.31-<br>821.36)      | 574.44(39<br>6.98-<br>807.08)      | 571.12(39<br>0.34-<br>807.11)      | 542.74(36<br>8.32-<br>765.14)     | 551.25(37<br>3.87-<br>772.34)      | 540.45(36<br>9.31-<br>762.93)      | 573.39(39<br>5.85-<br>809.99)      | 595.35(41<br>2.07-<br>839.43)      | 566.7(389<br>.42-796.4)          | 565.53(39<br>1.24-<br>792.69)      |
| Alcohol use disorders              |                                       | 454.28(30<br>4.77-<br>644.73)      | 486.49(32<br>6.32-<br>687.91)     | 460.66(30<br>5.57-<br>646.77)      | 453.56(29<br>9.91-<br>642.47)      | 454.53(30<br>2.95-<br>646.31)      | 462.37(31<br>0.01-<br>651.64)     | 471.21(31<br>7.44-<br>678.52)      | 472.05(31<br>6.66-<br>663.48)      | 446.17(29<br>6.36-<br>631.75)      | 450.36(29<br>9.67-<br>639.47)      | 460.92(30<br>8.39-<br>656.57)    | 455.11(30<br>5.64-<br>648.19)      |
| Blindness and vision loss          |                                       | 383.02(27<br>2.55-<br>519.95)      | 347.22(24<br>6.22-<br>474.95)     | 322.34(22<br>8.23-<br>445.97)      | 355.48(25<br>1.77-<br>483.78)      | 313.58(22<br>3.53-<br>430.77)      | 410.54(29<br>2-556.93)            | 379.93(27<br>1.01-<br>517.27)      | 428.49(30<br>6.6-<br>582.75)       | 369.14(26<br>4.12-<br>501.8)       | 347.36(24<br>8.19-<br>478.52)      | 505.96(36<br>1.64-<br>683.24)    | 340.33(23<br>9.33-<br>467.52)      |
| Dietary iron deficiency            |                                       | 370.51(24<br>3.97-<br>548.63)      | 184.58(11<br>3.75-<br>280.55)     | 651.89(41<br>5.68-<br>992.99)      | 275.52(17<br>1.3-<br>429.89)       | 271.12(16<br>4.3-<br>412.23)       | 635.62(41<br>2.52-<br>925.11)     | 513.32(32<br>5.35-<br>768.71)      | 418.16(26<br>1.33-<br>627.49)      | 651.12(41<br>0.67-<br>982.35)      | 269.64(16<br>6.49-<br>414.45)      | 384.24(23<br>3.2-<br>584.22)     |                                    |

| Causes of YLDs                                    | Ethiopia                      | Addis Ababa                   | Afar                          | Amhara                        | B/Gumuz                       | Dire Dawa                     | Gambella                      | Harari                        | Oromia                        | Somali                        | SNNP                          | Tigray                        |
|---------------------------------------------------|-------------------------------|-------------------------------|-------------------------------|-------------------------------|-------------------------------|-------------------------------|-------------------------------|-------------------------------|-------------------------------|-------------------------------|-------------------------------|-------------------------------|
| Neonatal disorders                                | 318.26(24<br>2.74-<br>401.72) | 430.65(33<br>2.45-<br>537.78) | 369.73(28<br>2.95-<br>465.34) | 291.19(21<br>5.26-<br>379.78) | 238.95(17<br>3.04-<br>321.49) | 314.68(23<br>0.77-<br>417.11) | 337.21(25<br>6.12-<br>425.91) | 311.39(22<br>9.45-<br>406.47) | 332.01(24<br>6.72-<br>426.18) | 276.19(20<br>6.47-<br>357.75) | 307.44(23<br>0.19-<br>401.02) | 352.41(26<br>7.68-<br>442.89) |
| Diabetes mellitus                                 | 284.78(19<br>4.89-<br>390.61) | 323.18(22<br>0.05-<br>439.75) | 320.29(21<br>9.37-<br>440.03) | 276.45(18<br>7.92-<br>379.25) | 287.19(19<br>4.82-<br>392.53) | 284.81(19<br>1.18-<br>394.94) | 338.26(23<br>1.61-<br>460.52) | 306.48(20<br>6.48-<br>418.28) | 267.4(182<br>.21-367.3)       | 289.49(19<br>7.2-<br>402.68)  | 322.02(22<br>0.05-<br>437.34) | 277.65(18<br>7.5-<br>380.72)  |
| Conflict and terrorism                            | 279(154.1<br>9-557.77)        | 271.33(16<br>0.72-<br>489.96) | 214.6(114<br>.68-427.4)       | 340.17(20<br>3.97-<br>576.85) | 246.01(13<br>1.92-<br>482.48) | 245.27(13<br>5.49-<br>457.06) | 543.22(34<br>0.76-<br>857.62) | 463.53(28<br>6.01-<br>729.05) | 236.68(12<br>9.29-<br>451.27) | 287.43(16<br>6.44-<br>480.22) | 214(73.76<br>-804.95)         | 451.64(28<br>0.24-<br>728.71) |
| Headache disorders                                | 277.63(74<br>.61-<br>577.65)  | 277.4(72.<br>53-<br>580.86)   | 291.8(80.<br>59-<br>608.79)   | 277.07(73<br>.01-<br>575.58)  | 291.88(82<br>.74-<br>606.93)  | 292.21(81<br>.59-<br>604.75)  | 290.85(79<br>.82-<br>602.06)  | 292.28(83<br>.92-<br>609.08)  | 277.11(73<br>.73-<br>579.11)  | 292.02(81<br>.97-<br>610.96)  | 267.41(71<br>.08-<br>562.47)  | 291.79(80<br>.39-<br>609.75)  |
| Road injuries                                     | 264.25(19<br>2.2-<br>349.48)  | 263.03(18<br>9.93-<br>349.3)  | 260.31(18<br>9.4-<br>342.81)  | 257.79(18<br>6.34-<br>340.94) | 263.3(192<br>.43-<br>347.29)  | 281.43(20<br>5.23-<br>371.12) | 258.12(18<br>7.77-<br>340.27) | 273.03(19<br>9.71-<br>361.7)  | 257.38(18<br>6.46-<br>338.68) | 288.74(21<br>0.83-<br>381.63) | 281.26(20<br>3.17-<br>369.49) | 253.73(18<br>5.36-<br>337.02) |
| Anxiety disorders                                 | 259.64(18<br>1.19-<br>358.14) | 260.58(18<br>1.6-<br>359.85)  | 260.1(176<br>7.21-<br>361.51) | 258.81(17<br>7.21-<br>361.34) | 259.39(18<br>0.4-<br>361.11)  | 260.13(18<br>0.85-<br>359.33) | 258.77(17<br>9.33-<br>361.13) | 258.98(18<br>1.02-<br>360.98) | 260.4(182<br>.33-<br>362.42)  | 259.09(18<br>0.43-<br>362.33) | 259.27(17<br>8.27-<br>359.15) | 259.21(18<br>0.01-<br>365.23) |
| Oral disorders                                    | 240.24(12<br>5.1-<br>412.26)  | 243.1(125<br>.36-<br>426.46)  | 239.19(12<br>5.12-<br>408.15) | 240.25(12<br>7.14-<br>411.69) | 240.14(12<br>7.71-<br>409.67) | 241.54(12<br>5.84-<br>419.84) | 240.22(12<br>3.37-<br>410.29) | 242.02(12<br>6.91-<br>423.99) | 240.28(12<br>5.19-<br>411.68) | 240.17(12<br>4.28-<br>410.97) | 239.23(12<br>3.05-<br>409.17) | 240.57(12<br>4.71-<br>408.85) |
| Diarrheal diseases                                | 230.45(15<br>8.63-<br>317.86) | 187.01(12<br>9.12-<br>260.69) | 215.15(14<br>9.67-<br>296.93) | 244.69(16<br>9.1-<br>341.01)  | 255.01(17<br>6.55-<br>353.67) | 185.55(12<br>7.59-<br>253.88) | 224.05(15<br>3.32-<br>309.95) | 198.81(13<br>9.29-<br>273.04) | 221.63(15<br>3.86-<br>306.26) | 240.43(16<br>2.76-<br>330.26) | 238.45(16<br>3.18-<br>328.45) | 222.57(15<br>5.64-<br>308.61) |
| Osteoarthritis                                    | 180.31(91<br>.58-<br>354.62)  | 194.19(98<br>.37-<br>385.27)  | 179.3(90.<br>36-<br>351.08)   | 179.44(91<br>.82-351.1)       | 179.81(91<br>.15-<br>352.96)  | 186.75(94<br>.69-364)         | 181.6(91.<br>03-<br>357.82)   | 186.61(94<br>.23-<br>365.53)  | 180.08(90<br>.95-<br>353.79)  | 178.06(90<br>.14-<br>350.09)  | 178.81(90<br>.5-355.07)       | 181.25(91<br>.05-353.8)       |
| Endocrine, metabolic, blood, and immune disorders | 171.98(11<br>5.02-<br>240.15) | 186.08(12<br>2.85-<br>262.29) | 183.8(124<br>.59-<br>258.24)  | 166.09(11<br>1.22-<br>234.1)  | 165.77(11<br>1.59-<br>234.31) | 199.23(13<br>3.65-<br>277.86) | 171.44(11<br>5.46-<br>238.11) | 191.04(12<br>7.37-<br>269.31) | 173.54(11<br>6.31-<br>245.43) | 182.99(12<br>3.69-<br>257.43) | 165.33(11<br>0.41-<br>233.3)  | 172.97(11<br>6.92-<br>243.93) |
| Schistosomiasis                                   | 162.51(76<br>.51-<br>314.62)  | 0 (0-0)                       | 37.53(16.<br>95-71.47)        | 253.12(11<br>6.39-<br>498.89) | 20.3(8.69-<br>41.57)          | 92.84(43.<br>27-<br>178.47)   | 22.68(10.<br>18-45.5)         | 0(0-0)                        | 146.58(68<br>.57-<br>276.04)  | 10.59(4.8<br>5-20.22)         | 191.13(89<br>.61-<br>382.07)  | 169.28(79<br>.35-<br>326.74)  |
| Schizophrenia                                     | 142.67(10<br>3.56-<br>182.86) | 146.7(106<br>.39-<br>190.52)  | 140.37(99<br>.49-<br>181.62)  | 142.78(10<br>3.39-<br>183.6)  | 141.49(10<br>1.88-<br>181.07) | 145.61(10<br>5.54-<br>186.18) | 140.44(10<br>0.23-<br>178.96) | 144.25(10<br>3.08-<br>183.88) | 143.53(10<br>3.84-<br>184.38) | 144.19(10<br>3.21-<br>184.21) | 139.8(101<br>.05-<br>180.04)  | 142.72(10<br>2.54-<br>184.03) |
| Fungal skin diseases                              | 139.06(56<br>.92-<br>293.08)  | 136.57(55<br>.29-<br>292.64)  | 136.5(55.<br>61-<br>285.27)   | 138.56(56<br>.03-<br>290.98)  | 135.4(54.<br>82-<br>283.39)   | 137.13(55<br>.27-<br>284.81)  | 136.76(56<br>.18-<br>285.58)  | 140.6(56.<br>5-294.31)        | 146.87(59<br>.86-<br>313.42)  | 131.66(52<br>.99-<br>277.51)  | 132.69(53<br>.51-<br>282.29)  | 129.54(52<br>.04-<br>275.35)  |
| Chronic obstructive pulmonary disease             | 138.74(11<br>4.53-<br>162.39) | 167.73(13<br>7.81-<br>197.73) | 137.58(11<br>1.99-<br>162.58) | 141.76(11<br>6.31-<br>166.31) | 135.41(11<br>0.05-<br>159.3)  | 124.37(10<br>1.25-<br>148.13) | 147.13(12<br>1.45-<br>173.17) | 138.4(112<br>.54-<br>162.92)  | 126.14(10<br>3.37-<br>151.04) | 136.48(11<br>0.97-<br>161.34) | 151.56(12<br>2.81-<br>180.25) | 142.77(11<br>6.7-170.3)       |



Table S11. Age-standardised DALY rates per 100 000 populations for leading causes in Ethiopia's 9 regions and 2 cities in 1990, 2019 and percentage changes for both sexes

| Diseases and conditions     |          | Ethiopia | Addis Ababa | Afar  | Amhara | B/Gumuz | Dire Dawa | Gambella | Harari | Oromia | Somali | SNNP  | Tigray |
|-----------------------------|----------|----------|-------------|-------|--------|---------|-----------|----------|--------|--------|--------|-------|--------|
| Maternal disorders          | 1990     | 2215     | 1099        | 5325  | 2093   | 5665    | 1349      | 1056     | 1678   | 2215   | 3194   | 1826  | 2812   |
|                             | 2019     | 497      | 167         | 1298  | 339    | 1159    | 296       | 200      | 328    | 496    | 972    | 538   | 470    |
|                             | % change | -78%     | -85%        | -76%  | -84%   | -80%    | -78%      | -81%     | -80%   | -78%   | -70%   | -71%  | -83%   |
| Neonatal disorders          | 1990     | 7009     | 4321        | 5807  | 7183   | 7924    | 7575      | 7379     | 7343   | 6948   | 5583   | 7785  | 6647   |
|                             | 2019     | 4244     | 1561        | 3678  | 4560   | 5039    | 3919      | 3135     | 3882   | 4279   | 4641   | 4242  | 3075   |
|                             | % change | -39%     | -64%        | -37%  | -37%   | -36%    | -48%      | -58%     | -47%   | -38%   | -17%   | -46%  | -54%   |
| Diarrheal diseases          | 1990     | 11579    | 5528        | 18433 | 11927  | 17118   | 9990      | 13568    | 12480  | 12330  | 9998   | 12009 | 8277   |
|                             | 2019     | 2898     | 884         | 3238  | 3096   | 3719    | 1709      | 1986     | 1897   | 2853   | 3419   | 3110  | 2090   |
|                             | % change | -75%     | -84%        | -82%  | -74%   | -78%    | -83%      | -85%     | -85%   | -77%   | -66%   | -74%  | -75%   |
| Tuberculosis                | 1990     | 10505    | 8581        | 20904 | 9513   | 18556   | 9343      | 11692    | 12954  | 11822  | 8369   | 9456  | 10117  |
|                             | 2019     | 1853     | 1366        | 4394  | 1828   | 3282    | 1366      | 2231     | 1828   | 1536   | 3281   | 2060  | 1459   |
|                             | % change | -82%     | -84%        | -79%  | -81%   | -82%    | -85%      | -81%     | -86%   | -87%   | -61%   | -78%  | -86%   |
| Lower respiratory infection | 1990     | 10208    | 6377        | 11014 | 8708   | 14986   | 11767     | 13194    | 12844  | 11237  | 6302   | 11651 | 10365  |
|                             | 2019     | 2416     | 1295        | 2837  | 2027   | 3583    | 1842      | 1947     | 2070   | 2445   | 3249   | 2709  | 1989   |
|                             | % change | -76%     | -80%        | -74%  | -77%   | -76%    | -84%      | -85%     | -84%   | -78%   | -48%   | -77%  | -81%   |
| Protein-energy malnutrition | 1990     | 4003     | 1642        | 7955  | 2935   | 7097    | 3593      | 3649     | 3193   | 4868   | 4273   | 4085  | 4415   |
|                             | 2019     | 492      | 260         | 998   | 281    | 1089    | 377       | 343      | 355    | 518    | 1214   | 481   | 293    |
|                             | % change | -88%     | -84%        | -87%  | -90%   | -85%    | -90%      | -91%     | -89%   | -89%   | -72%   | -88%  | -93%   |
| HIV/AIDS                    | 2005     | 8330     | 24442       | 9739  | 12370  | 6744    | 14234     | 15192    | 9697   | 6258   | 5404   | 3672  | 8756   |
|                             | 2019     | 372      | 4741        | 3010  | 2064   | 1427    | 3639      | 4982     | 2326   | 1242   | 2118   | 1023  | 1723   |
|                             | % change | -80%     | -81%        | -69%  | -83%   | -79%    | -74%      | -67%     | -76%   | -80%   | -61%   | -72%  | -80%   |

Table S12. Age-standardised DALY rates per 100 000 populations for all causes combined and leading fifteen causes in Ethiopia's regions and chartered cities, women, men, 2019

DALY = disability-adjusted life year

|               | Causes of DALYs                            | Ethiopia | Addis Ababa | Afar  | Amhara | B/Gumuz | Dire Dawa | Gambella | Harari | Oromia | Somali | SNNP  | Tigray |
|---------------|--------------------------------------------|----------|-------------|-------|--------|---------|-----------|----------|--------|--------|--------|-------|--------|
| Female DALYs  | All causes                                 | 37960    | 33462       | 57208 | 35485  | 54242   | 36227     | 34925    | 36245  | 37104  | 48489  | 39342 | 34712  |
|               | Neonatal disorders                         | 3445     | 1248        | 2993  | 3697   | 4088    | 3180      | 2536     | 3139   | 3489   | 3791   | 3408  | 2510   |
|               | Diarrheal diseases                         | 2529     | 655         | 3351  | 2598   | 3569    | 1498      | 1492     | 1636   | 2590   | 3089   | 2767  | 1708   |
|               | Lower respiratory infections               | 2144     | 1054        | 3066  | 1709   | 3750    | 1555      | 1196     | 1763   | 2240   | 3085   | 2341  | 1756   |
|               | HIV/AIDS                                   | 2109     | 6281        | 3680  | 2374   | 1672    | 4203      | 6439     | 2405   | 1594   | 2593   | 1267  | 2137   |
|               | Stroke                                     | 1713     | 2114        | 3739  | 1479   | 3150    | 1614      | 1443     | 1856   | 1579   | 2342   | 1703  | 2216   |
|               | Ischemic heart disease                     | 1370     | 1721        | 3019  | 1131   | 2569    | 1305      | 1160     | 1450   | 1340   | 1840   | 1408  | 1557   |
|               | Tuberculosis                               | 1321     | 894         | 4591  | 1153   | 3482    | 886       | 891      | 1177   | 1169   | 2843   | 1398  | 997    |
|               | Maternal disorders                         | 982      | 312         | 2606  | 668    | 2355    | 592       | 378      | 677    | 992    | 1996   | 1050  | 905    |
|               | Gynecological diseases                     | 943      | 922         | 967   | 933    | 940     | 940       | 935      | 947    | 945    | 999    | 942   | 935    |
|               | Depressive disorders                       | 876      | 916         | 852   | 875    | 861     | 866       | 865      | 867    | 881    | 842    | 872   | 870    |
|               | Cirrhosis and other CLD                    | 854      | 777         | 1486  | 713    | 1278    | 750       | 624      | 805    | 863    | 975    | 984   | 843    |
|               | Diabetes mellitus                          | 821      | 853         | 1423  | 654    | 1270    | 740       | 598      | 827    | 848    | 973    | 924   | 871    |
|               | Malaria                                    | 732      | 92          | 481   | 662    | 1446    | 1585      | 1231     | 1453   | 709    | 769    | 910   | 530    |
|               | Congenital birth defects                   | 699      | 343         | 608   | 788    | 979     | 594       | 445      | 591    | 661    | 819    | 716   | 544    |
| Low back pain | 670                                        | 610      | 646         | 665   | 668    | 622     | 670       | 621      | 683    | 649    | 679    | 668   |        |
| Male DALYs    | All causes                                 | 43873    | 36947       | 48589 | 45104  | 48382   | 41846     | 50913    | 43942  | 40367  | 49628  | 47960 | 39431  |
|               | Neonatal disorders                         | 5001     | 1861        | 4318  | 5380   | 5939    | 4619      | 3701     | 4586   | 5029   | 5440   | 5035  | 3612   |
|               | Diarrheal diseases                         | 3256     | 1138        | 3253  | 3609   | 3835    | 1937      | 2518     | 2190   | 3106   | 3646   | 3448  | 2488   |
|               | Lower respiratory infections               | 2676     | 1575        | 2693  | 2358   | 3443    | 2151      | 2743     | 2427   | 2635   | 3345   | 3072  | 2234   |
|               | Tuberculosis                               | 2380     | 1895        | 4322  | 2518   | 3109    | 1861      | 3733     | 2483   | 1892   | 3674   | 2729  | 1951   |
|               | Stroke                                     | 1843     | 2500        | 2312  | 1960   | 1867    | 1876      | 3104     | 2203   | 1463   | 2103   | 1943  | 2210   |
|               | Cirrhosis and other chronic liver diseases | 1816     | 1751        | 1904  | 1848   | 1708    | 1637      | 2276     | 1801   | 1644   | 1806   | 2254  | 1430   |
|               | Ischemic heart disease                     | 1786     | 2713        | 2223  | 1916   | 1764    | 1749      | 2956     | 1948   | 1418   | 1904   | 1924  | 1941   |
|               | HIV/AIDS                                   | 1282     | 3116        | 2349  | 1742   | 1195    | 3075      | 3282     | 2257   | 894    | 1663   | 770   | 1274   |
|               | Diabetes mellitus                          | 1131     | 1353        | 1174  | 1075   | 999     | 1102      | 1521     | 1238   | 1031   | 1048   | 1390  | 1141   |
|               | Road injuries                              | 1013     | 959         | 1094  | 976    | 1057    | 1030      | 1184     | 1052   | 917    | 1074   | 1240  | 914    |
|               | Congenital birth defects                   | 954      | 390         | 772   | 1125   | 1266    | 795       | 619      | 791    | 896    | 1113   | 960   | 735    |
|               | Chronic obstructive pulmonary disease      | 761      | 695         | 724   | 802    | 647     | 600       | 901      | 712    | 682    | 711    | 883   | 809    |
|               | Malaria                                    | 745      | 101         | 414   | 696    | 1397    | 1684      | 1311     | 1478   | 725    | 690    | 929   | 555    |
|               | Depressive disorders                       | 742      | 701         | 729   | 743    | 735     | 738       | 735      | 740    | 751    | 723    | 741   | 737    |
| Low back pain | 730                                        | 666      | 707         | 723   | 730    | 679     | 727       | 676      | 745    | 711    | 739    | 726   |        |

Table S13. Patterns of age-standardised leading causes of premature mortality in Ethiopia and regions and chartered cities, 2019

|                                         | Ethiopia | Addis Ababa | Afar | Amhara | B-Gumuz | Dire Dawa | Gambella | Harari | Oromia | Somali | SNNP | Tigray |
|-----------------------------------------|----------|-------------|------|--------|---------|-----------|----------|--------|--------|--------|------|--------|
| Neonatal disorders                      | 1        | 7           | 2    | 1      | 1       | 1         | 2        | 1      | 1      | 1      | 1    | 1      |
| Diarrheal diseases                      | 2        | 9           | 3    | 2      | 3       | 6         | 7        | 6      | 2      | 3      | 2    | 4      |
| Lower respiratory infections            | 3        | 4           | 5    | 3      | 2       | 3         | 6        | 3      | 3      | 2      | 3    | 3      |
| Tuberculosis                            | 4        | 5           | 1    | 5      | 4       | 8         | 3        | 5      | 4      | 4      | 4    | 7      |
| Stroke                                  | 5        | 3           | 6    | 6      | 5       | 4         | 4        | 4      | 5      | 5      | 5    | 2      |
| HIV/AIDS                                | 6        | 1           | 4    | 4      | 9       | 2         | 1        | 2      | 8      | 6      | 8    | 6      |
| Ischemic heart disease                  | 7        | 2           | 7    | 7      | 6       | 7         | 5        | 7      | 6      | 7      | 6    | 5      |
| Cirrhosis and other CLD                 | 8        | 6           | 8    | 8      | 7       | 9         | 8        | 9      | 7      | 8      | 7    | 8      |
| Congenital birth defects                | 9        | 20          | 18   | 9      | 12      | 11        | 18       | 11     | 9      | 12     | 11   | 11     |
| Diabetes mellitus                       | 10       | 8           | 11   | 11     | 14      | 10        | 10       | 10     | 10     | 13     | 10   | 9      |
| Malaria                                 | 11       | 40          | 22   | 10     | 8       | 5         | 9        | 8      | 11     | 15     | 9    | 14     |
| Meningitis                              | 12       | 15          | 10   | 12     | 13      | 15        | 15       | 14     | 12     | 10     | 12   | 17     |
| Hypertensive heart disease              | 13       | 10          | 13   | 13     | 15      | 12        | 11       | 12     | 14     | 17     | 15   | 10     |
| Chronic kidney disease                  | 14       | 11          | 14   | 16     | 17      | 13        | 12       | 13     | 13     | 18     | 13   | 13     |
| Road injuries                           | 15       | 13          | 15   | 15     | 16      | 14        | 13       | 15     | 16     | 16     | 14   | 15     |
| Chronic obstructive pulmonary disease   | 16       | 14          | 19   | 14     | 19      | 18        | 17       | 16     | 17     | 20     | 16   | 12     |
| Protein-energy malnutrition             | 17       | 24          | 12   | 24     | 11      | 17        | 20       | 20     | 15     | 9      | 20   | 22     |
| Maternal disorders                      | 18       | 27          | 9    | 21     | 10      | 23        | 33       | 23     | 18     | 11     | 18   | 16     |
| Interpersonal violence                  | 19       | 16          | 17   | 19     | 18      | 16        | 16       | 17     | 20     | 19     | 17   | 18     |
| Whooping cough                          | 20       | 48          | 16   | 17     | 20      | 25        | 21       | 18     | 19     | 14     | 21   | 31     |
| Self-harm                               | 21       | 19          | 20   | 23     | 23      | 24        | 19       | 22     | 22     | 21     | 19   | 20     |
| Alzheimer's disease and other dementias | 22       | 21          | 28   | 22     | 26      | 20        | 22       | 24     | 21     | 27     | 24   | 19     |
| Leukemia                                | 23       | 22          | 26   | 20     | 22      | 22        | 23       | 25     | 23     | 22     | 23   | 24     |
| Breast cancer                           | 24       | 12          | 24   | 28     | 24      | 21        | 25       | 21     | 25     | 33     | 25   | 21     |
| Cervical cancer                         | 25       | 23          | 21   | 27     | 21      | 28        | 32       | 27     | 24     | 25     | 26   | 23     |

Table S14. Burden of leading risk factors attributable to age-standardised YLL, YLD and DALYs rates in Ethiopia, both sexes, 2019

SEV= summary exposure value, YLL= years of life lost, YLD= years lived with disability, DALYs=disability-adjusted life years

| Risk Factors                              | SEV per 100 | YLL per 100,000 | YLD per 100,000 | DALYs per 100,000 |
|-------------------------------------------|-------------|-----------------|-----------------|-------------------|
| Unsafe water, sanitation and hand washing | 97          | 3142            | 213             | 3355              |
| Air pollution                             | 69          | 4072            | 374             | 4447              |
| Dietary risks                             | 38          | 1782            | 154             | 1936              |
| Child and maternal malnutrition           | 18          | 5835            | 619             | 6454              |
| High systolic blood pressure              | 20          | 2281            | 170             | 2451              |
| High LDI cholesterol                      | 14          | 464             | 31              | 497               |
| High body mass index                      | 11          | 884             | 186             | 1071              |
| Tobacco use                               | 5           | 564             | 84              | 648               |
| High fasting plasma glucose               | 6           | 1385            | 334             | 1719              |
| Unsafe sex                                | -           | 1563            | 134             | 1698              |
| Alcohol Use                               | 4           | 1176            | 308             | 1485              |

Table S15. Risk factors attributable age-standardised DALY rates per 100 000 population for all risks combined and leading fifteen risk factors, in Ethiopia 9 regions and 2 cities, females, males, and both sexes, 2019  
 DALY=disability-adjusted life-year

|                                            |                                      | Ethiopia | Addis Ababa | Afar  | Amhara | B/Gumuz | Dawa  | Gambella | Harari | Oromia | Somali | SNNP  | Tigray |
|--------------------------------------------|--------------------------------------|----------|-------------|-------|--------|---------|-------|----------|--------|--------|--------|-------|--------|
| Risk factor-attributable DALYs, both sexes | All risk factors                     | 20093    | 17745       | 26563 | 19175  | 24693   | 18860 | 22056    | 18821  | 19306  | 25299  | 20749 | 17834  |
|                                            | Particulate matter pollution         | 4434     | 2223        | 5776  | 4227   | 5793    | 3298  | 4144     | 3492   | 4306   | 5788   | 4757  | 4136   |
|                                            | Low birth weight and short gestation | 3680     | 1338        | 3360  | 3701   | 4176    | 3328  | 2766     | 3181   | 3851   | 4235   | 3551  | 2749   |
|                                            | Unsafe water source                  | 2461     | 382         | 2756  | 2647   | 3219    | 1400  | 1642     | 1406   | 2434   | 2963   | 2664  | 1730   |
|                                            | High systolic blood pressure         | 2451     | 3513        | 3578  | 2322   | 3181    | 2433  | 2932     | 2778   | 2294   | 2692   | 2306  | 2780   |
|                                            | Child growth failure                 | 2201     | 460         | 2348  | 1998   | 3342    | 1244  | 933      | 1302   | 2320   | 3463   | 2174  | 1178   |
|                                            | Unsafe sanitation                    | 1922     | 432         | 2168  | 2074   | 2513    | 1070  | 1330     | 1242   | 1901   | 2269   | 2067  | 1328   |
|                                            | High fasting plasma glucose          | 1719     | 2094        | 2552  | 1514   | 2137    | 1632  | 2049     | 1878   | 1591   | 1927   | 2036  | 1806   |
|                                            | Unsafe sex                           | 1698     | 4361        | 3199  | 1870   | 1510    | 2886  | 4309     | 1677   | 1278   | 2171   | 1187  | 1736   |
|                                            | No access to hand washing facility   | 1522     | 474         | 1735  | 1502   | 2087    | 973   | 1096     | 1036   | 1517   | 1908   | 1668  | 1140   |
|                                            | Alcohol use                          | 1485     | 1485        | 1485  | 1485   | 1485    | 1485  | 1485     | 1485   | 1485   | 1485   | 1485  | 1485   |
|                                            | High body-mass index                 | 1071     | 2739        | 1336  | 874    | 1430    | 1622  | 1630     | 2009   | 930    | 765    | 1100  | 1310   |
|                                            | Kidney dysfunction                   | 824      | 945         | 1122  | 729    | 1010    | 790   | 891      | 884    | 784    | 875    | 945   | 859    |
|                                            | Smoking                              | 534      | 527         | 1207  | 226    | 718     | 1124  | 1677     | 1601   | 630    | 1426   | 615   | 181    |
|                                            | Occupational injuries                | 527      | 173         | 635   | 559    | 513     | 307   | 375      | 301    | 556    | 795    | 469   | 472    |

|                                        |                                      |       |       |       |       |       |       |       |       |       |       |       |       |
|----------------------------------------|--------------------------------------|-------|-------|-------|-------|-------|-------|-------|-------|-------|-------|-------|-------|
|                                        | High LDL cholesterol                 | 495   | 774   | 799   | 457   | 702   | 507   | 642   | 576   | 426   | 551   | 526   | 557   |
| Risk factor-attributable DALYs, Female | All risk factors                     | 17770 | 16731 | 28523 | 16302 | 25379 | 16641 | 17187 | 15572 | 17581 | 24045 | 17459 | 16116 |
|                                        | Particulate matter pollution         | 3903  | 1877  | 6445  | 3563  | 6299  | 2936  | 2755  | 3107  | 3953  | 5562  | 4013  | 3748  |
|                                        | Low birth weight and short gestation | 2940  | 1103  | 2629  | 3176  | 3536  | 2750  | 2206  | 2601  | 3046  | 3644  | 2596  | 2192  |
|                                        | High systolic blood pressure         | 2417  | 3086  | 4948  | 2018  | 4207  | 2296  | 1983  | 2590  | 2456  | 3035  | 2284  | 2772  |
|                                        | Unsafe sex                           | 2367  | 6128  | 4519  | 2379  | 2252  | 3643  | 5934  | 1995  | 1893  | 3032  | 1727  | 2409  |
|                                        | Child growth failure                 | 2204  | 403   | 2431  | 2068  | 3445  | 1215  | 849   | 1266  | 2301  | 3628  | 2168  | 1126  |
|                                        | Unsafe water source                  | 2148  | 280   | 2850  | 2219  | 3087  | 1226  | 1233  | 1213  | 2210  | 2676  | 2369  | 1411  |
|                                        | Unsafe sanitation                    | 1678  | 321   | 2243  | 1740  | 2411  | 938   | 999   | 1071  | 1726  | 2050  | 1839  | 1085  |
|                                        | High fasting plasma glucose          | 1462  | 1685  | 2871  | 1134  | 2512  | 1350  | 1085  | 1558  | 1480  | 1857  | 1639  | 1603  |
|                                        | No access to handwashing facility    | 1337  | 369   | 1825  | 1262  | 2077  | 839   | 763   | 889   | 1383  | 1760  | 1468  | 962   |
|                                        | High body-mass index                 | 1098  | 2680  | 1865  | 794   | 1948  | 1652  | 1155  | 1991  | 1010  | 894   | 1085  | 1380  |
|                                        | Kidney dysfunction                   | 732   | 838   | 1341  | 561   | 1201  | 688   | 523   | 767   | 758   | 847   | 816   | 770   |
|                                        | Iron deficiency                      | 609   | 397   | 1315  | 388   | 702   | 803   | 479   | 612   | 605   | 1747  | 551   | 488   |
|                                        | Intimate Partner Violence            | 544   | 871   | 552   | 635   | 372   | 649   | 1063  | 421   | 516   | 311   | 470   | 443   |
|                                        | Diet High in Sodium                  | 508   | 612   | 1087  | 426   | 913   | 477   | 424   | 542   | 494   | 678   | 522   | 601   |
| Alcohol use                            | 489                                  | 725   | 1072  | 292   | 704   | 489   | 354   | 445   | 602   | 448   | 470   | 508   |       |

|                                             |                                      |       |       |       |       |       |       |       |       |       |       |       |       |
|---------------------------------------------|--------------------------------------|-------|-------|-------|-------|-------|-------|-------|-------|-------|-------|-------|-------|
| <b>Risk factor-attributable DALYs, Male</b> | All risk factors                     | 22323 | 19008 | 25691 | 22050 | 24293 | 21196 | 27087 | 22287 | 20960 | 26234 | 23971 | 19560 |
|                                             | Particulate matter pollution         | 4944  | 2613  | 5475  | 4896  | 5411  | 3679  | 5608  | 3910  | 4641  | 5988  | 5481  | 4529  |
|                                             | Low birth weight and short gestation | 4382  | 1560  | 4043  | 4199  | 4782  | 3876  | 3294  | 3730  | 4616  | 4791  | 4459  | 3277  |
|                                             | Unsafe water source                  | 2765  | 495   | 2769  | 3088  | 3321  | 1587  | 2083  | 1624  | 2650  | 3160  | 2954  | 2061  |
|                                             | High systolic blood pressure         | 2487  | 4010  | 2901  | 2619  | 2409  | 2580  | 3952  | 2951  | 2156  | 2551  | 2330  | 2780  |
|                                             | Alcohol use                          | 2462  | 3502  | 2490  | 2082  | 2605  | 2829  | 4217  | 3390  | 2229  | 2232  | 3357  | 2124  |
|                                             | Child growth failure                 | 2199  | 522   | 2298  | 1930  | 3252  | 1276  | 1022  | 1339  | 2339  | 3350  | 2182  | 1228  |
|                                             | Unsafe sanitation                    | 2159  | 556   | 2178  | 2417  | 2591  | 1213  | 1686  | 1434  | 2070  | 2419  | 2292  | 1580  |
|                                             | High fasting plasma glucose          | 1964  | 2569  | 2325  | 1902  | 1820  | 1936  | 3048  | 2252  | 1694  | 1963  | 2423  | 2017  |
|                                             | No access to handwashing facility    | 1700  | 593   | 1706  | 1750  | 2092  | 1116  | 1452  | 1204  | 1645  | 2006  | 1866  | 1326  |
|                                             | High body-mass index                 | 1046  | 2795  | 1000  | 957   | 986   | 1584  | 2153  | 2013  | 854   | 693   | 1117  | 1237  |
|                                             | Unsafe sex                           | 1030  | 2490  | 2069  | 1348  | 842   | 2117  | 2433  | 1360  | 679   | 1446  | 642   | 1016  |
|                                             | Smoking                              | 975   | 1040  | 1845  | 423   | 1080  | 2122  | 3059  | 3148  | 1154  | 2231  | 1090  | 330   |
|                                             | Kidney dysfunction                   | 911   | 1076  | 990   | 899   | 856   | 900   | 1269  | 1016  | 808   | 889   | 1071  | 950   |
|                                             | Occupational injuries                | 808   | 276   | 990   | 844   | 825   | 465   | 551   | 448   | 846   | 1160  | 735   | 730   |
| Diet low in fruits                          | 534                                  | 674   | 651   | 550   | 521   | 505   | 848   | 586   | 439   | 573   | 609   | 586   |       |

Table S16. Leading risk factors attribution to all-cause age-standardised YLLs rate per 100 000 populations for Ethiopia, 9 regions and 2 cities, both sexes, all age, in 2019

YLLs=years of life lost

| Rank | Ethiopia                             | % of total YLL | Addis Ababa                          | % of total YLL | Afar                                 | % of total YLL | Amhara                               | % of total YLL |
|------|--------------------------------------|----------------|--------------------------------------|----------------|--------------------------------------|----------------|--------------------------------------|----------------|
| 1    | Particulate matter pollution         | 13.45%         | Unsafe sex                           | 16.30%         | Particulate matter pollution         | 13.23%         | Particulate matter pollution         | 13.06%         |
| 2    | Low birth weight and short gestation | 11.76%         | High systolic blood pressure         | 13.29%         | High systolic blood pressure         | 8.36%          | Low birth weight and short gestation | 12.10%         |
| 3    | High systolic blood pressure         | 7.57%          | High body-mass index                 | 9.33%          | Low birth weight and short gestation | 7.89%          | Unsafe water source                  | 8.29%          |
| 4    | Unsafe water source                  | 7.54%          | Particulate matter pollution         | 7.99%          | Unsafe sex                           | 7.40%          | High systolic blood pressure         | 7.29%          |
| 5    | Child growth failure                 | 7.13%          | High fasting plasma glucose          | 6.97%          | Unsafe water source                  | 6.34%          | Child growth failure                 | 6.58%          |
| 6    | Unsafe sanitation                    | 5.89%          | Alcohol use                          | 6.81%          | Child growth failure                 | 5.60%          | Unsafe sanitation                    | 6.49%          |
| 7    | Unsafe sex                           | 5.19%          | Low birth weight and short gestation | 4.60%          | High fasting plasma glucose          | 5.30%          | Unsafe sex                           | 5.80%          |
| 8    | No access to handwashing facility    | 4.79%          | Kidney dysfunction                   | 3.45%          | Unsafe sanitation                    | 4.99%          | No access to handwashing facility    | 4.81%          |
| 9    | High fasting plasma glucose          | 4.59%          | Low temperature                      | 3.00%          | No access to handwashing facility    | 4.09%          | High fasting plasma glucose          | 4.08%          |
| 10   | Alcohol use                          | 3.90%          | High LDL cholesterol                 | 2.96%          | Alcohol use                          | 3.75%          | Alcohol use                          | 2.99%          |
| Rank | B/Gumuz                              | % of total YLL | Dire Dawa                            | % of total YLL | Gambella                             | % of total YLL | Harari                               | % of total YLL |
| 1    | Particulate matter pollution         | 13.46%         | Low birth weight and short gestation | 11.49%         | Unsafe sex                           | 12.44%         | Particulate matter pollution         | 10.72%         |
| 2    | Low birth weight and short gestation | 10.19%         | Particulate matter pollution         | 10.51%         | Particulate matter pollution         | 11.96%         | Low birth weight and short gestation | 10.59%         |
| 3    | Child growth failure                 | 8.19%          | Unsafe sex                           | 9.35%          | High systolic blood pressure         | 8.75%          | High systolic blood pressure         | 8.90%          |
| 4    | Unsafe water source                  | 7.46%          | High systolic blood pressure         | 8.04%          | Low birth weight and short gestation | 8.35%          | High body-mass index                 | 5.71%          |
| 5    | High systolic blood pressure         | 7.45%          | High body-mass index                 | 4.70%          | Alcohol use                          | 5.91%          | Alcohol use                          | 5.25%          |
| 6    | Unsafe sanitation                    | 5.82%          | High fasting plasma glucose          | 4.64%          | High fasting plasma glucose          | 5.40%          | High fasting plasma glucose          | 5.21%          |
| 7    | No access to handwashing facility    | 4.97%          | Alcohol use                          | 4.64%          | Smoking                              | 4.75%          | Unsafe sex                           | 5.01%          |
| 8    | High fasting plasma glucose          | 4.39%          | Unsafe water source                  | 4.48%          | Unsafe water source                  | 4.65%          | Smoking                              | 4.80%          |
| 9    | Unsafe sex                           | 3.45%          | Child growth failure                 | 4.32%          | High body-mass index                 | 4.33%          | Child growth failure                 | 4.37%          |
| 10   | Alcohol use                          | 3.45%          | Smoking                              | 3.44%          | Unsafe sanitation                    | 3.77%          | Unsafe water source                  | 4.33%          |
| Rank | Oromia                               | % of total YLL | Somali                               | % of total YLL | SNNP                                 | % of total YLL | Tigray                               | % of total YLL |



|    |                                      |        |                                      |        |                                      |        |                                      |        |
|----|--------------------------------------|--------|--------------------------------------|--------|--------------------------------------|--------|--------------------------------------|--------|
| 1  | Particulate matter pollution         | 14.07% | Particulate matter pollution         | 0.1431 | Particulate matter pollution         | 13.11% | Particulate matter pollution         | 14.31% |
| 2  | Low birth weight and short gestation | 13.28% | Low birth weight and short gestation | 10.91% | Low birth weight and short gestation | 0.1049 | Low birth weight and short gestation | 9.88%  |
| 3  | Child growth failure                 | 8.13%  | Child growth failure                 | 8.98%  | Unsafe water source                  | 7.50%  | High systolic blood pressure         | 9.85%  |
| 4  | Unsafe water source                  | 8.04%  | Unsafe water source                  | 7.33%  | High systolic blood pressure         | 6.61%  | Unsafe sex                           | 6.02%  |
| 5  | High systolic blood pressure         | 7.57%  | High systolic blood pressure         | 6.69%  | Child growth failure                 | 6.47%  | Unsafe water source                  | 5.90%  |
| 6  | Unsafe sanitation                    | 6.28%  | Unsafe sanitation                    | 5.61%  | Unsafe sanitation                    | 5.83%  | High fasting plasma glucose          | 5.57%  |
| 7  | No access to handwashing facility    | 5.16%  | Unsafe sex                           | 5.48%  | High fasting plasma glucose          | 5.06%  | Unsafe sanitation                    | 4.53%  |
| 8  | High fasting plasma glucose          | 4.53%  | No access to handwashing facility    | 4.85%  | Alcohol use                          | 4.85%  | Child growth failure                 | 4.33%  |
| 9  | Unsafe sex                           | 4.19%  | High fasting plasma glucose          | 4.17%  | No access to handwashing facility    | 4.83%  | High body-mass index                 | 4.14%  |
| 10 | Alcohol use                          | 4.01%  | Smoking                              | 3.32%  | Unsafe sex                           | 3.35%  | No access to handwashing facility    | 4.05%  |

Table S17. Top 10 leading causes of national age-standardised death, YLL, YLD and DALY rates per 100,000 for both sexes in Ethiopia in 2019, and the percent change of variation from 1990

| <b>Age standardized death rate</b>         |                           |                                                  |                             |                      |
|--------------------------------------------|---------------------------|--------------------------------------------------|-----------------------------|----------------------|
|                                            | <i>National rate 2019</i> | <i>Mean % change of variation from 1990-2019</i> | <i>Highest region</i>       | <i>Lowest region</i> |
| Stroke                                     | 90.18(70.62-110.04)       | -41%                                             |                             |                      |
| Lower respiratory infections               | 86.44(75.36-97.65)        | -61%                                             |                             | Addis Ababa          |
| Ischemic heart disease                     | 84.24(62.56-105.75)       | -24%                                             |                             |                      |
| Diarrheal diseases                         | 76.45(45.12-112.15)       | -75%                                             |                             | Addis Ababa          |
| Tuberculosis                               | 60.9(50.44-71.5)          | -81%                                             | Afar, Somali, B-Gumuz       |                      |
| Cirrhosis and other chronic liver diseases | 52.18(44.17-62.07)        | -32%                                             |                             |                      |
| Neonatal disorders                         | 44.31(34.92-56.99)        | -43%                                             |                             | Addis Ababa          |
| Diabetes mellitus                          | 36(31.01-41.43)           | -38%                                             |                             |                      |
| HIV/AIDS*                                  | 33.56(28.68-39.58)        | -83.52%                                          | Afar, Gambella, Addis Ababa |                      |
| Hypertensive heart disease                 | 31.97(17.85-53.09)        | -45%                                             |                             |                      |

| <b>Age-standardized YLL rate</b>           |                           |                                                  |                                  |                      |
|--------------------------------------------|---------------------------|--------------------------------------------------|----------------------------------|----------------------|
|                                            | <i>National rate 2019</i> | <i>Mean % change of variation from 1990-2019</i> | <i>Highest region</i>            | <i>Lowest region</i> |
| Neonatal disorders                         | 3936(3102.02-5062.36)     | -43%                                             |                                  | Addis Ababa          |
| Diarrheal diseases                         | 2679.41(1823.93-3760.22)  | -76%                                             |                                  | Addis Ababa          |
| Lower respiratory infections               | 2404.57(2059.41-2833.31)  | -76%                                             |                                  | Addis Ababa          |
| Tuberculosis                               | 1729.19(1421.57-2049.86)  | -83%                                             | Afar, Somali, B-Gumuz            |                      |
| Stroke                                     | 1639.45(1277.27-1998.83)  | -51%                                             | Afar                             |                      |
| HIV/AIDS*                                  | 1581.17(1311.51-1935.43)  | -84.35%                                          | Dire Dawa, Gambella, Addis Ababa |                      |
| Ischemic heart disease                     | 1524.69(1133.11-1925.66)  | -38%                                             |                                  |                      |
| Cirrhosis and other chronic liver diseases | 1331.56(1095.91-1625.94)  | -38%                                             |                                  |                      |
| Congenital birth defects                   | 735.83(447.45-1200.08)    | -58%                                             |                                  |                      |
| Diabetes mellitus                          | 706.24(606.76-813.68)     | -49%                                             |                                  |                      |

| <b>Age-standardized YLD rate</b>   |                           |                                                  |                       |                      |
|------------------------------------|---------------------------|--------------------------------------------------|-----------------------|----------------------|
|                                    | <i>National rate 2019</i> | <i>Mean % change of variation from 1990-2019</i> | <i>Highest region</i> | <i>Lowest region</i> |
| Depressive disorders               | 808.7(562.26-1115.11)     | -9%                                              |                       |                      |
| Low back pain                      | 700.06(491.31-935.19)     | -1%                                              |                       |                      |
| Age-related and other hearing loss | 552.7(377.77-779.89)      | -5%                                              |                       |                      |
| Gynecological diseases             | 470.78(322.13-659.38)     | -2%                                              |                       |                      |
| Blindness and vision loss          | 420.96(303.1-568.56)      | -12%                                             |                       |                      |
| Dietary iron deficiency            | 396.03(261.75-579.23)     | -24%                                             | Somalia               |                      |
| Headache disorders                 | 353.16(95.74-736.24)      | -1%                                              |                       |                      |

|                    |                       |      |  |  |
|--------------------|-----------------------|------|--|--|
| Anxiety disorders  | 331.14(230.89-451.16) | -4%  |  |  |
| Neonatal disorders | 307.52(235.31-386.04) | 603% |  |  |
| Diabetes mellitus  | 273.67(189.12-376.26) | -6%  |  |  |

| <b>Age-standardized DALY rate</b>          |                           |                                                  |                                        |                      |
|--------------------------------------------|---------------------------|--------------------------------------------------|----------------------------------------|----------------------|
|                                            | <i>National rate 2019</i> | <i>Mean % change of variation from 1990-2019</i> | <i>Highest region</i>                  | <i>Lowest region</i> |
| Neonatal disorders                         | 4243.53(3407.87-5383.87)  | -39%                                             |                                        | Addis Ababa          |
| Diarrheal diseases                         | 2898.12(2035.97-3973.63)  | -75%                                             |                                        | Addis Ababa          |
| Lower respiratory infections               | 2415.69(2067.8-2845.72)   | -76%                                             |                                        | Addis Ababa          |
| Tuberculosis                               | 1853.05(1539.82-2163.82)  | -82%                                             | Afar, B/Gumuz Somali                   |                      |
| Stroke                                     | 1777.86(1411.33-2139.63)  | -50%                                             | Afar                                   |                      |
| HIV/AIDS*                                  | 1699.06(1423.54-2050.66)  | -83.83%                                          | Addis Ababa, Afar, Dire Dawa, Gambella |                      |
| Ischemic heart disease                     | 1579.98(1184.72-1974)     | -36%                                             |                                        |                      |
| Cirrhosis and other chronic liver diseases | 1341.44(1106.26-1637.42)  | -38%                                             |                                        |                      |
| Diabetes mellitus                          | 979.91(849.79-1115.68)    | -41%                                             |                                        |                      |
| Congenital birth defects                   | 829.43(540.82-1298.86)    | -56%                                             |                                        |                      |

Table S18. GATHER Checklist for “Progress in health among regions of Ethiopia, 1990-2019: a sub-national country analysis for the Global Burden of Disease Study 2019”

| #  | Checklist item                                                                                                                                                                                                                                                                                                                                                                            | Description of compliance                                                                                                                                                                                                                                         | Reference                                                                                                                                                                     |
|----|-------------------------------------------------------------------------------------------------------------------------------------------------------------------------------------------------------------------------------------------------------------------------------------------------------------------------------------------------------------------------------------------|-------------------------------------------------------------------------------------------------------------------------------------------------------------------------------------------------------------------------------------------------------------------|-------------------------------------------------------------------------------------------------------------------------------------------------------------------------------|
|    | <b>Objectives and funding</b>                                                                                                                                                                                                                                                                                                                                                             |                                                                                                                                                                                                                                                                   |                                                                                                                                                                               |
| 1  | Define the indicator(s), populations (including age, sex, and geographic entities), and time period(s) for which estimates were made.                                                                                                                                                                                                                                                     | Narrative provided in paper providing description of indicators, population, definitions, and time period                                                                                                                                                         | Main text                                                                                                                                                                     |
| 2  | List the funding sources for the work.                                                                                                                                                                                                                                                                                                                                                    | Funding source listed in paper                                                                                                                                                                                                                                    | Abstract (Funding)                                                                                                                                                            |
|    | <b>Data Inputs</b>                                                                                                                                                                                                                                                                                                                                                                        |                                                                                                                                                                                                                                                                   |                                                                                                                                                                               |
|    | <i>For all data inputs from multiple sources that are synthesized as part of the study:</i>                                                                                                                                                                                                                                                                                               |                                                                                                                                                                                                                                                                   |                                                                                                                                                                               |
| 3  | Describe how the data were identified and how the data were accessed.                                                                                                                                                                                                                                                                                                                     | Narrative description of data seeking methods provided                                                                                                                                                                                                            | Main text (Methods) and methods appendix                                                                                                                                      |
| 4  | Specify the inclusion and exclusion criteria. Identify all ad-hoc exclusions.                                                                                                                                                                                                                                                                                                             | Narrative about inclusion and exclusion criteria by data type provided                                                                                                                                                                                            | Main text (Methods) and methods appendix                                                                                                                                      |
| 5  | Provide information on all included data sources and their main characteristics. For each data source used, report reference information or contact name/institution, population represented, data collection method, year(s) of data collection, sex and age range, diagnostic criteria or measurement method, and sample size, as relevant.                                             | An interactive, online data source tool that provides metadata for data sources by component, geography, cause, risk, or impairment has been developed                                                                                                            | Online data citation tools                                                                                                                                                    |
| 6  | Identify and describe any categories of input data that have potentially important biases (e.g., based on characteristics listed in item 5).                                                                                                                                                                                                                                              | Summary of known biases by cause included in methods appendix                                                                                                                                                                                                     | Methods appendix                                                                                                                                                              |
|    | <i>For data inputs that contribute to the analysis but were not synthesized as part of the study:</i>                                                                                                                                                                                                                                                                                     |                                                                                                                                                                                                                                                                   |                                                                                                                                                                               |
| 7  | Describe and give sources for any other data inputs.                                                                                                                                                                                                                                                                                                                                      | Included in online data source tool, <a href="http://ghdx.healthdata.org/gbd-2019">http://ghdx.healthdata.org/gbd-2019</a>                                                                                                                                        | Online data citation tools                                                                                                                                                    |
|    | <i>For all data inputs:</i>                                                                                                                                                                                                                                                                                                                                                               |                                                                                                                                                                                                                                                                   |                                                                                                                                                                               |
| 8  | Provide all data inputs in a file format from which data can be efficiently extracted (e.g., a spreadsheet rather than a PDF), including all relevant meta-data listed in item 5. For any data inputs that cannot be shared because of ethical or legal reasons, such as third-party ownership, provide a contact name or the name of the institution that retains the right to the data. | Downloads of input data available through online tools, including data visualization tools and data query tools, <a href="http://ghdx.healthdata.org/gbd-2019">http://ghdx.healthdata.org/gbd-2019</a> ; input data not available in tools will be made available | Online data visualization tools, data query tools, and the Global Health Data Exchange, <a href="http://ghdx.healthdata.org/gbd-2019">http://ghdx.healthdata.org/gbd-2019</a> |
|    | <b>Data analysis</b>                                                                                                                                                                                                                                                                                                                                                                      |                                                                                                                                                                                                                                                                   |                                                                                                                                                                               |
| 9  | Provide a conceptual overview of the data analysis method. A diagram may be helpful.                                                                                                                                                                                                                                                                                                      | Flow diagrams of the overall methodological processes, as well as cause-specific modelling processes, have been provided                                                                                                                                          | Main text (Methods) and methods appendix                                                                                                                                      |
| 10 | Provide a detailed description of all steps of the analysis, including mathematical formulae. This description should cover, as relevant, data cleaning, data pre-processing, data adjustments and weighting of data sources, and mathematical or statistical model(s).                                                                                                                   | Flow diagrams and corresponding methodological write-ups for each cause, as well as the demographics and causes of death databases and modelling processes, have been provided                                                                                    | Main text (Methods) and methods appendix                                                                                                                                      |
| 11 | Describe how candidate models were evaluated and how the final model(s) were selected.                                                                                                                                                                                                                                                                                                    | Provided in the methodological write-ups                                                                                                                                                                                                                          | Methods appendix                                                                                                                                                              |
| 12 | Provide the results of an evaluation of model performance, if done, as well as the results of any relevant sensitivity analysis.                                                                                                                                                                                                                                                          | Provided in the methodological write-ups                                                                                                                                                                                                                          | Methods appendix                                                                                                                                                              |
| 13 | Describe methods for calculating uncertainty of the estimates. State which sources of uncertainty were, and were not, accounted for in the uncertainty analysis.                                                                                                                                                                                                                          | Provided in the methodological write-ups                                                                                                                                                                                                                          | Methods appendix                                                                                                                                                              |
| 14 | State how analytic or statistical source code used to generate estimates can be accessed.                                                                                                                                                                                                                                                                                                 | Access statement provided                                                                                                                                                                                                                                         | Code is provided in an online repository                                                                                                                                      |

| Results and Discussion |                                                                                                                                                          |                                                                                                                                                                                                                      |                                                                                                                                                                                                                              |
|------------------------|----------------------------------------------------------------------------------------------------------------------------------------------------------|----------------------------------------------------------------------------------------------------------------------------------------------------------------------------------------------------------------------|------------------------------------------------------------------------------------------------------------------------------------------------------------------------------------------------------------------------------|
| 15                     | Provide published estimates in a file format from which data can be efficiently extracted.                                                               | Results are available through online data visualization tools, the Global Health Data Exchange, and the online data query tool <a href="http://ghdx.healthdata.org/gbd-2019">http://ghdx.healthdata.org/gbd-2019</a> | Main text, methods appendix, and online data tools (data visualization tools, data query tools, and the Global Health Data Exchange, <a href="http://ghdx.healthdata.org/gbd-2019">http://ghdx.healthdata.org/gbd-2019</a> ) |
| 16                     | Report a quantitative measure of the uncertainty of the estimates (e.g. uncertainty intervals).                                                          | Uncertainty intervals are provided with all results                                                                                                                                                                  | Main text, methods appendix, and online data tools (data visualization tools, data query tools, and the Global Health Data Exchange, <a href="http://ghdx.healthdata.org/gbd-2019">http://ghdx.healthdata.org/gbd-2019</a> ) |
| 17                     | Interpret results in light of existing evidence. If updating a previous set of estimates, describe the reasons for changes in estimates.                 | Discussion of methodological changes between GBD rounds provided in the narrative of the Article and methods appendix                                                                                                | Main text (Methods and Discussion) and methods appendix                                                                                                                                                                      |
| 18                     | Discuss limitations of the estimates. Include a discussion of any modelling assumptions or data limitations that affect interpretation of the estimates. | Discussion of limitations provided in the narrative of the main paper, as well as in the methodological write-ups in the methods appendix                                                                            | Main text (Limitations) and methods appendix                                                                                                                                                                                 |

## Section 8: References

1. Central Statistical Agency (Ethiopia). Ethiopia Population and Housing Census 1984.
2. Central Statistical Agency (Ethiopia), United Nations Population Fund (UNFPA), United States Agency for International Development (USAID). Ethiopia Population and Housing Census 1994.
3. Central Statistical Agency (Ethiopia), Government of Ethiopia, United Nations Population Fund (UNFPA), United Nations Development Programme (UNDP). Ethiopia Population and Housing Census 2007. Addis Ababa, Ethiopia: Central Statistical Agency (Ethiopia).
4. Wang H, Abbas KM, Abbasifard M, Abbasi-Kangevari M, Abbastabar H, Abd-Allah F, et al. Global age-sex-specific fertility, mortality, healthy life expectancy (HALE), and population estimates in 204 countries and territories, 1950–2019: a comprehensive demographic analysis for the Global Burden of Disease Study 2019. *The Lancet* [Internet]. 2020 Oct 17 [cited 2021 Apr 15];396(10258):1160–203. Available from: [https://www.thelancet.com/journals/lancet/article/PIIS0140-6736\(20\)30977-6/abstract](https://www.thelancet.com/journals/lancet/article/PIIS0140-6736(20)30977-6/abstract)
5. Vos T, Lim SS, Abbafati C, Abbas KM, Abbasi M, Abbasifard M, et al. Global burden of 369 diseases and injuries in 204 countries and territories, 1990–2019: a systematic analysis for the Global Burden of Disease Study 2019. *The Lancet* [Internet]. 2020 Oct 17 [cited 2021 Apr 15];396(10258):1204–22. Available from: [https://www.thelancet.com/journals/lancet/article/PIIS0140-6736\(20\)30925-9/abstract](https://www.thelancet.com/journals/lancet/article/PIIS0140-6736(20)30925-9/abstract)
6. Achoki T, Miller-Petrie MK, Glenn SD, Kalra N, Lesego A, Gathecha GK, et al. Health disparities across the counties of Kenya and implications for policy makers, 1990–2016: a systematic analysis for the Global Burden of Disease Study 2016. *The Lancet Global Health* [Internet]. 2019 Jan 1 [cited 2021 Nov 28];7(1):e81–95. Available from: <https://www.sciencedirect.com/science/article/pii/S2214109X18304728>
7. James SL, Abate D, Abate KH, Abay SM, Abbafati C, Abbasi N, et al. Global, regional, and national incidence, prevalence, and years lived with disability for 354 diseases and injuries for 195 countries and territories, 1990–2017: a systematic analysis for the Global Burden of Disease Study 2017. *The Lancet* [Internet]. 2018 Nov 10 [cited 2021 Apr 15];392(10159):1789–858. Available from: [https://www.thelancet.com/journals/lancet/article/PIIS0140-6736\(18\)32279-7/abstract](https://www.thelancet.com/journals/lancet/article/PIIS0140-6736(18)32279-7/abstract)
8. Dicker D, Nguyen G, Abate D, Abate KH, Abay SM, Abbafati C, et al. Global, regional, and national age-sex-specific mortality and life expectancy, 1950–2017: a systematic analysis for the Global Burden of Disease Study 2017. *The Lancet* [Internet]. 2018 Nov 10 [cited 2021 Apr 15];392(10159):1684–735. Available from: [https://www.thelancet.com/journals/lancet/article/PIIS0140-6736\(18\)31891-9/abstract](https://www.thelancet.com/journals/lancet/article/PIIS0140-6736(18)31891-9/abstract)
9. Foreman KJ, Lozano R, Lopez AD, Murray CJ. Modeling causes of death: an integrated approach using CODEm. *Population Health Metrics* [Internet]. 2012 Jan 6 [cited 2021 Apr 16];10(1):1. Available from: <https://doi.org/10.1186/1478-7954-10-1>
10. Naghavi M, Abajobir AA, Abbafati C, Abbas KM, Abd-Allah F, Abera SF, et al. Global, regional, and national age-sex specific mortality for 264 causes of death, 1980–2016: a systematic analysis for the Global Burden of Disease Study 2016. *The Lancet* [Internet]. 2017 Sep 16 [cited 2021 Apr 16];390(10100):1151–210. Available from: [https://www.thelancet.com/journals/lancet/article/PIIS0140-6736\(17\)32152-9/abstract](https://www.thelancet.com/journals/lancet/article/PIIS0140-6736(17)32152-9/abstract)
11. Kyu HH, Abate D, Abate KH, Abay SM, Abbafati C, Abbasi N, et al. Global, regional, and national disability-adjusted life-years (DALYs) for 359 diseases and injuries and healthy life expectancy (HALE) for 195 countries and territories, 1990–2017: a systematic analysis for the Global Burden of Disease Study 2017. *The Lancet* [Internet]. 2018 Nov 10 [cited 2021 Apr 16];392(10159):1859–922. Available from: [https://www.thelancet.com/journals/lancet/article/PIIS0140-6736\(18\)32335-3/abstract](https://www.thelancet.com/journals/lancet/article/PIIS0140-6736(18)32335-3/abstract)
12. Hay SI, Abajobir AA, Abate KH, Abbafati C, Abbas KM, Abd-Allah F, et al. Global, regional, and national disability-adjusted life-years (DALYs) for 333 diseases and injuries and healthy life expectancy (HALE) for 195 countries and territories, 1990–2016: a systematic analysis for the Global Burden of Disease Study

2016. *The Lancet* [Internet]. 2017 Sep 16 [cited 2021 Apr 16];390(10100):1260–344. Available from: [https://www.thelancet.com/journals/lancet/article/PIIS0140-6736\(17\)32130-X/abstract](https://www.thelancet.com/journals/lancet/article/PIIS0140-6736(17)32130-X/abstract)
13. Stanaway JD, Afshin A, Gakidou E, Lim SS, Abate D, Abate KH, et al. Global, regional, and national comparative risk assessment of 84 behavioural, environmental and occupational, and metabolic risks or clusters of risks for 195 countries and territories, 1990–2017: a systematic analysis for the Global Burden of Disease Study 2017. *The Lancet* [Internet]. 2018 Nov 10 [cited 2021 Apr 15];392(10159):1923–94. Available from: [https://www.thelancet.com/journals/lancet/article/PIIS0140-6736\(18\)32225-6/abstract](https://www.thelancet.com/journals/lancet/article/PIIS0140-6736(18)32225-6/abstract)
14. Murray CJL, Aravkin AY, Zheng P, Abbafati C, Abbas KM, Abbasi-Kangevari M, et al. Global burden of 87 risk factors in 204 countries and territories, 1990–2019: a systematic analysis for the Global Burden of Disease Study 2019. *The Lancet* [Internet]. 2020 Oct 17 [cited 2021 Apr 15];396(10258):1223–49. Available from: [https://www.thelancet.com/journals/lancet/article/PIIS0140-6736\(20\)30752-2/abstract](https://www.thelancet.com/journals/lancet/article/PIIS0140-6736(20)30752-2/abstract)
